# Supplementary material for: Chemical characterization and synergetic source apportionment of PM 2.5 at multiple sites in the Beijing–Tianjin–Hebei region, China
Source: Copernicus journal article supplement (doi:10.5194/acp-2017-446), 2017-06-12
Supplement: Supplementary file [file acp-2017-446-AC1-supplement.pdf]

Dear editor and referees,

We appreciate the referees for very careful reading and valuable comments, which greatly contribute to improving the quality of this paper. We take these comments very seriously, modified the manuscript accordingly and replied in our point-by-point response attached below. In addition, the manuscript concerning the grammar and syntax has been improved by native English speaker. The response is highlighted in blue and changes in the manuscript are colored in red.

## **Response to Anonymous Referee #1**

Anonymous Referee #1

In this study, atmospheric PM<sub>2.5</sub> samples were collected for one year at three urban sites and one regional background site in the BTH and analyzed for their chemical compositions. Emission sources of PM<sub>2.5</sub> at the four sites were comprehensively investigated by using PMF and backward trajectory analysis. Some important findings were reported, which is helpful for readers to improve their understanding on the pollution situation in the region. Within this reviewer's knowledge, this work may be the first study using unified approach for sampling and subsequent analysis to perform synergetic source apportionment of PM<sub>2.5</sub> in BTH region. In general, this paper was well written, and the scientific contents fall in the scope and interest of the journal of ACP. Therefore, this referee recommends it to be accepted for final publication in Atmospheric Chemistry and Physics with minor revisions after addressing following questions.

General comments

1. The applied analysis method of PMF must be explained in more detail. How the authors prepared the error matrix and especially how they dealt with combining errors from different measurement techniques. In addition, the authors do not discuss how many solutions they explored (e.g. 1-10 solutions), and how similar or different the resulting factors are.

Response: The consideration of preparation error matrix for PMF are mainly based on the analytical error for each chemical species as the accuracy of the measurement techniques and analysis is different for different species. The particulate sulfate, nitrate and ammonium were abundant in PM<sub>2.5</sub> and their determination were with good quality control, then the error fractions for these three components were estimated at only 5%. The laser reflection correction method was used for the determination of OPC (organic pyrolyzed carbon) and the precise determination of its concentration is influenced by many factors, and EC2 and EC3 were with low concentrations. Thus, OPC, EC2 and EC3 may have relatively high analytical error, then the their error fractions were estimated at 15%. And we estimated 10% error fractions for other species. In addition, we made OPC, EC2, EC3 and Mg<sup>2+</sup> in Beijing, OPC in Shijiazhuang, and Cr in Xinglong a weak category since they had relatively low signal-to-noise ratios (S/N), and there were no excluded species at all four sites. Moreover, PMF analysis requires a complete data set, the samples with missing values of individual species were all excluded in order to reduce the error, rather than replaced by the geometric mean of the remaining observations.

In this study, we explored 8 PMF solutions (5–12 factors) at the urban sites and 7 solutions (3–9 factors) at the regional background site. The factor number was determined based on the interpretability of different PMF solutions as well stability across bootstrap-replicate data sets as

represented by factor matching rate (Xie et al., 2013a, 2013b).

2. Eight factors were identified for Beijing and Tianjin, while nine were identified for Shijiazhuang and only five were identified for Xinglong. Although the first six factors were well identified, the remaining factors were poor discussed. What are the differences of these factors among the three megacities? Furthermore, the source apportionment results of the presented manuscript should be compared with the previous studies.

Response: In this study, we have used united method to resolve the source apportionment at all four sites and have obtained different factors at each site (eight for Beijing and Tianjin, nine for Shijiazhuang and five for Xinglong) . To facilitate the discussion, we classified these factors into six categories, such as coal combustion, secondary aerosol/inorganic aerosol, motor vehicle emissions, biomass burning, mineral dust and industrial processes. Meanwhile, some categories may contain more than one factor, such as the category of secondary aerosol/inorganic aerosol includes secondary aerosol, secondary inorganic aerosol, or the sum of nitrate-rich secondary and sulfate-rich secondary aerosol; the category of mineral dust contains road dust and soil dust. Therefore, the listed six factors in the manuscript covers all the factors that resolved at all four sites.

The identified  $PM_{2.5}$  sources of this study have been compared with those of recently published studies and the results from the Beijing Municipal Environmental Protection Bureau (<http://www.bjepb.gov.cn/>), the Tianjin Municipal Environmental Protection Bureau (<http://www.tjhb.gov.cn/>) and the Shijiazhuang Municipal Environmental Protection Bureau (<http://www.sjzjh.gov.cn/>), which are shown in Table S3 in the Supplement. And related discussion has been added in the manuscript (Page 19, line 5–17 of the manuscript), as follows:

" In summary, secondary inorganic aerosol (40.5%) and motor vehicle exhaust (24.9%) were the largest  $PM_{2.5}$  sources in Beijing and have greater values than the results of the 2010 study by Wu et al. (2014). The contribution of motor vehicle exhaust was close to that provided by the Beijing Municipal Environmental Protection Bureau (19.9–22.4%, <http://www.bjepb.gov.cn/>) (Table S3). Compared with those of Beijing, there were more complicated sources of  $PM_{2.5}$  in Tianjin and Shijiazhuang. Motor vehicle exhaust was also an important source at the two sites, but the contribution (15.2% in Tianjin and 17.3% in Shijiazhuang ) was lower than that in Beijing, which was consistent with the results published by the Environmental Protection Bureau (EPB) (Table S3). However, coal combustion became an important source in Tianjin (12.4%) and Shijiazhuang (15.5%), which was slightly lower than that from the Environmental Protection Bureau and that given by Liu et al. (2017a) (16.5% in Tianjin). The biggest  $PM_{2.5}$  source in Tianjin (29.2%) and Shijiazhuang (36.4%) was still secondary inorganic aerosol, of which the contribution in Tianjin was close to that of Liu et al. (2017a) (26.1%)."

3. It would be more concise and easy to follow if the authors could condense the manuscript by removing the Section 3.2.2 to the Supplement, as the results of "Diurnal variation" is not essential to the expression of main points of this manuscript.

Response: we have removed this section to the Supplement.

**"Supplementary text for describing the day-night variations of  $PM_{2.5}$  and major chemical components**

The analysis of the day-night variations indicates that the differences in the  $PM_{2.5}$  annual average concentrations during the day and those during the night were significant at the urban sites, where the values were 8–19% higher at night than those during the day, while negligible differences were found on the annual scale in Xinglong (Fig. S7). This obvious day-night variation of the  $PM_{2.5}$  concentrations in urban areas was probably due to the apparent changes in the height of the mixing layer between day and night (Zhao et al., 2009). However, in Xinglong, the dominant source was from the regional or long-range transport, with fewer contributions from local emissions; thus, the nocturnal stable boundary layer could have reduced the quantity of transmissions from the outside. The chemical compositions also recorded obvious day-night variations, as the mass ratio of  $NO_3^-/SO_4^{2-}$  recorded higher values at night (0.99–1.39) than during the day (0.81–1.13), which is consistent with the similar results obtained by Sun et al. (2016) in Xianghe, which is located approximately 50 km southeast of Beijing. Such day-night variations indicate the important role of the gas-phase photochemical production of sulfate during the day while the facilitated gas-to-particle partitioning of semi-volatile nitrate is associated with the low temperatures (Sun et al., 2016) and effective hydrolysis of  $N_2O_5$  at night, which is a major source of nitric acid in the urban atmosphere during the night and is more efficient on wet surfaces (Zhang et al., 2015). In addition, the relatively static and stable meteorological conditions at night resulted in obviously lower fractions of mineral dust (11.3–17.0%, except for in Tianjin), than those recorded during the day (18.3–24.3%)."

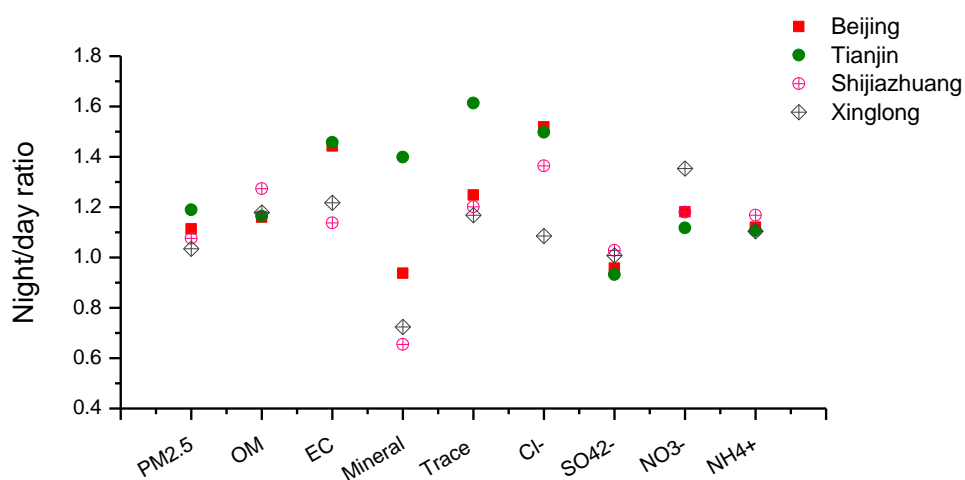

Figure S7. Day-night variations of  $PM_{2.5}$  and major chemical components, based on annual data

Specific comments:

1. Page 1, line 31-34. The conclusion of improving the quality of oil products from motor vehicles is weird. As haze pollution usually occurs when air masses originated from polluted industrial regions of the south prevailed, the control strategies should be focused on fossil fuel combustion, like coal combustion.

Response: It is true that haze pollution in Beijing usually occurs when air masses originating from polluted industrial regions to the south prevailed. However, this usually occurs during the initial stage of haze episodes and acts as an inducement for the occurrence of haze episodes (Wang et al., 2017), while during the peak stage of haze episodes, particularly extremely heavy haze episodes, the pollutions are often local-dominated. In this study, with the development of haze process, the

concentration and contribution of nitrate recorded a pronounced increase during the pollution process and the OC/EC mass ratio showed a significant reduction, both reflected the dominant contribution of local motor vehicle exhaust in haze episodes. Therefore, controlling local emissions is a much more important measure to alleviate the extreme haze episodes in Beijing (Wang et al., 2017), we should focus on the controlling the quantity of motor vehicles and improving the oil product for Beijing. Of course, emission control in surrounded pollution areas, especially in Shijiazhuang, Tianjin, Tangshan, Baoding, Langfang and Cangzhou, as well as Henan and Shandong province, are also important to reduce the PM<sub>2.5</sub> concentrations and the occurrence of haze episodes in Beijing (Wang et al., 2017). Therefore, we have improved this presentation to be more exact as follows (Page 1, line 33–36) :

" This study suggests that the control strategies to mitigate haze pollution in the BTH region should be focused on the reduction of gaseous precursor emissions from fossil fuel combustion (motor vehicle emissions in Beijing and coal combustion in Tianjin, Hebei and nearby provinces)."

2. Page2, line4: The first document named as "Zhang et al., 2015b" should be "Zhang et al., 2015a".

Response: It has been revised now.

3. Page2, line 20: Please briefly discuss the relationship between chemical components and health effects, and add more results about the effect of chemical components on the environment and climate.

Response: We have revised this part as follows (Page2, line 21–33):

"Haze pollution with high fine PM loading could profoundly impact ecosystems, regional-scale atmospheric visibility, traffic safety, the economy, and interactions with climate (Zhang et al., 2015a); more importantly, this pollution can have adverse effects on human health, including the increased risks of respiratory, cardiac and other medical conditions (Elliot et al., 2016; Wu et al., 2017), thus leading to increased mortality rates, especially in megacities, which are generally seriously polluted and densely populated. In addition to the particle mass concentration and particle size, the health effects of PM are closely related to its chemical composition (Zhang et al., 2015a), and different diseases respond differently to different air pollutants (Tang et al., 2017). Moreover, the climate and environmental domino effects of PM are also closely related to the PM chemical compositions due to their different optical properties, such as those of black carbon, mineral particles, and brown carbon, which are light absorbing, while organic matter, ammonium sulfate and ammonium nitrate are light scattering (Tao et al., 2014; Wang et al., 2015; Wu et al., 2009; Zhang et al., 2016). "

4. Page 3, line 23: "have reported that a new ...." should be "have reported a new ...."

Response: It has been revised in the manuscript.

5. Page 3, line 34: "....., these studies yield a narrow view of their ....", here, "their" is ambiguous.

Response: we have revised this presentation.

6. Page 8, line 1: You should introduce the eight carbon fractions in Section 2.2.2 firstly. Otherwise, we don't know what are OC1, OC2, OC3.....

Response: The introduction of the eight carbon fractions has been added in the part of Section 2.2.2 now in Page 6, line 23–28, as follows:

" In a pure helium atmosphere, OC1, OC2, OC3 and OC4 are produced stepwise at 140 °C, 280 °C, 480 °C and 580 °C, respectively; followed by EC1 (540 °C), EC2 (780 °C) and EC3 (840 °C) in a 2% oxygen-contained helium atmosphere. The OPC (organic pyrolyzed carbon) is determined when the reflected laser signal returns to its initial value after oxygen is added to the analyzed atmosphere. Therefore, the OC is operationally defined as  $OC=OC1+OC2+OC3+OC4+OPC$ , while the EC is defined as  $EC=EC1+EC2+EC3-OPC$ . Detailed procedures can be found in Xin et al. (2015)."

7. Page 8, line 30: The values of PM<sub>2.5</sub> annual average concentration should be shown as "mean ± standard deviation"

Response: The standard deviation has been added now.

8. Page 9, Figure 2: Please add an instruction about BJ, TJ, SJZ and XL

Response: To be consistent with other figures, the abbreviations of the sampling sites in Figure 2 have been replaced with their full names as follows:

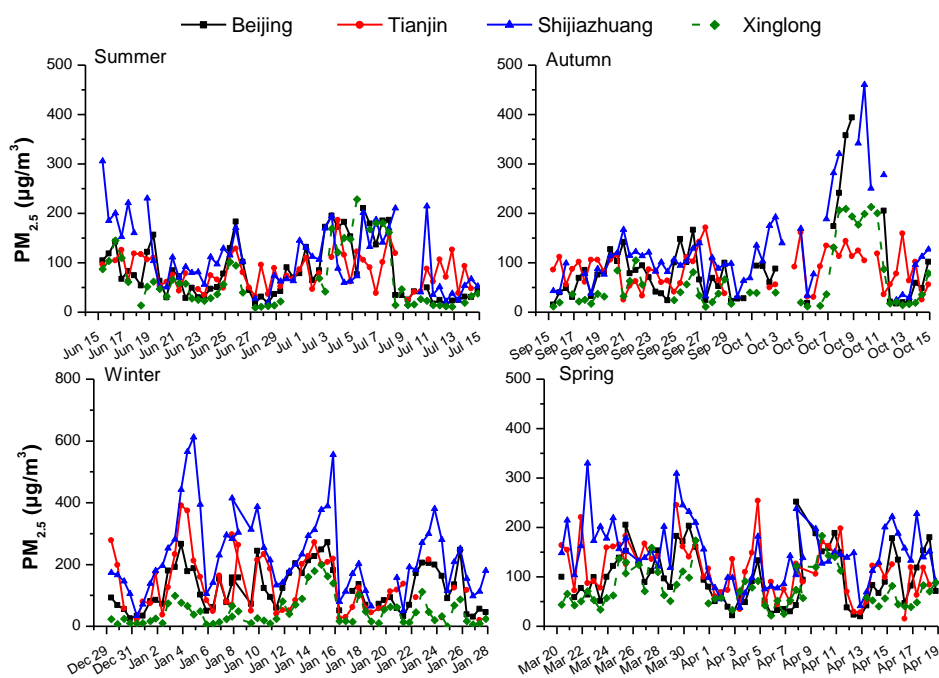

9. Page 10 line 2 to 5, I think the frequent rain is also very important for the PM clear in summer.

Response: We quite agree with this. Rain is very beneficial to the wet deposition of atmospheric particulate matter. And summer is characterized by frequent rain usually accounting for 75% of annual rainfall in Beijing (Zhang et al., 2013) and is accompanied by great rainfall intensity. However, the data of precipitation during the study period were not available to us, thus we did not discuss its impact on the wet deposition of PM.

10. Page 11, line 15: "Therefore, the  $\text{NO}_3^-/\text{SO}_4^{2-}$  mass ratio was larger than 1.0 at Beijing, implying that the predominance of motor vehicle emissions over coal combustion in the contribution to PM pollution" this statement implies that motor vehicle emissions is the single source of  $\text{NO}_x$ , which is incorrect, as coal combustion from power plants is another important source.

Response: Actually, Zhao et al. (2013a) reported that atmospheric  $\text{NO}_x$  in China are mainly emitted from power plants, industry and transportation in 2010. Although many previous studies have shown that coal combustion emissions from power plants are also the most important sources of  $\text{NO}_x$  in China, vehicular emissions contribute much more to surface  $\text{NO}_x$  concentrations than power plants due to the elevated heights of emission stacks (Pan et al., 2016), and the widespread use of pollution control devices on power plants (fitted with  $\text{NO}_x$  removal systems, such as the Selective Catalytic Reduction system) has greatly decreased the emission of  $\text{NO}_x$  under the "Twelfth Five-Year Plan for National Environment Protection" in China (Gu et al., 2013; Zong et al., 2017). In contrast, the explosive growth in car ownership in recent years has resulted in vehicle exhaust becoming an important source of  $\text{NO}_x$  pollution (Zong et al., 2017), especially in Beijing and Tianjin, the emission intensity of  $\text{NO}_x$  is very strong due to numerous automobiles accumulate in small areas (Zhao et al., 2012). And atmospheric  $\text{SO}_2$  are mainly from coal combustion emissions (83% in the Huabei region) (Zhao et al., 2012). Therefore, the mass ratio of  $\text{NO}_3^-/\text{SO}_4^{2-}$  could reflect the relative contribution of mobile and stationary sources to the aerosol pollution to a certain extent. However, the statement of "Therefore, the  $\text{NO}_3^-/\text{SO}_4^{2-}$  mass ratio was larger than 1.0 at Beijing, implying that the predominance of motor vehicle emissions over coal combustion in the contribution to PM pollution" in the manuscript is lack of rigor, we have revised it as:

" Therefore, the higher  $\text{NO}_3^-/\text{SO}_4^{2-}$  mass ratio of Beijing implies that the predominance of motor vehicle emissions in the contributions to PM pollution (Han et al., 2016; Yang et al., 2015), while in Tianjin and Shijiazhuang, coal combustion may still play a dominant role. "

11. Page 12, Section 3.2.2: The title should not be "diurnal variation", but "day-night variation".

Response: Thank the referee for pointing out this incorrect presentation, indeed, this section is "day-night variation" rather than "diurnal variation". Therefore, we have revised it now. In addition, we have removed this section to the Supplement to make the structure of this article more concise.

12. Page 12, line 26: "(Sun, et al., 2016)" should be "(Sun et al., 2016)"

Response: It has been revised in the manuscript.

13. Page 15, line 15: "noticeably A remarkable....." should be "noticeably. A remarkable.....".

Response: It has been revised in the manuscript.

14. Page 15, line18-35: The authors discussed about the variation of OC/EC mass ratio with the pollution level, would you please display as a chart to make it more intuitive?

Response: Thanks for this good suggestion. The variation of OC/EC mass ratio with the pollution level has been added in this figure (now Fig. 7).

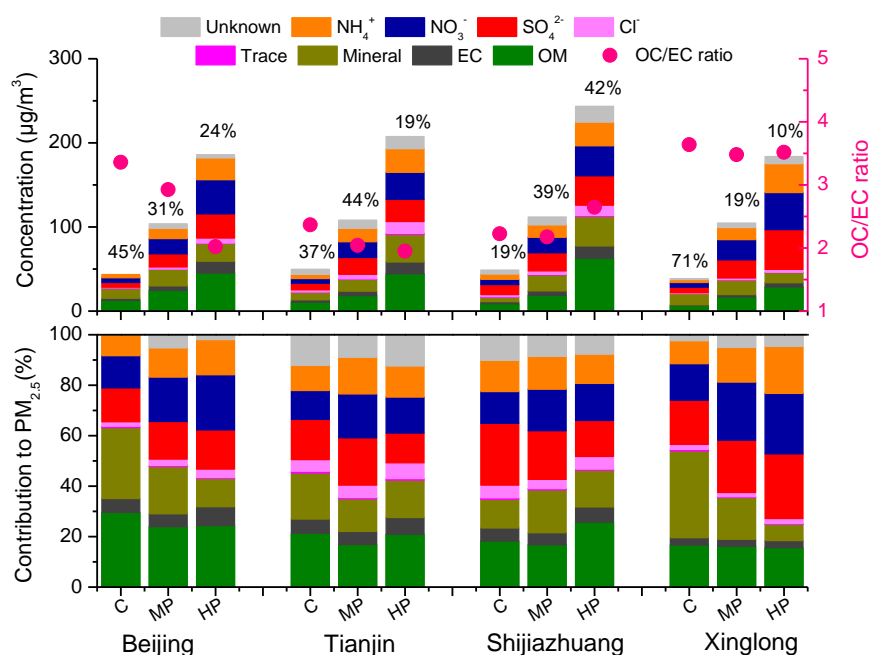

Figure 7. The evolutions of each aerosol chemical species and the ratio of OC/EC (marked with pink dots) at different pollution levels during the entire observational period. C, MP, and HP represent clean days ( $PM_{2.5} < 75 \mu g/m^3$ ), moderate pollution days ( $75 \leq PM_{2.5} < 150 \mu g/m^3$ ) and heavy pollution days ( $PM_{2.5} \geq 150 \mu g/m^3$ ), respectively. "%" represents the proportion of the filter sample quantity at each pollution level out of the total samples.

15. Page 15 line 31. "Therefore, the fact that the OC/EC ratio increases with the increasing development of haze pollution....." This statement is wrong based on the context, it should be " ... the OC/EC ratio decreases with the increasing ..."

Response: We are sorry for our carelessness. Actually, the OC/EC ratio in Beijing decreased with the increasing development of haze pollution. The wrong presentation has been revised now.

16. Page 15, Section 3.2.4: I suggest the authors show the meteorological parameters at different pollution level in the Supplement to further support the analysis of accumulation and enhanced secondary formation on pollution days.

Response: Thanks for this suggestion, we quite agree that the meteorological parameters at different pollution level and their day-night variations are necessary to assist the analysis of accumulation and enhanced secondary formations on pollution days. Therefore, we have shown the meteorological parameters at different pollution level and their day-night variations in Table S2 in the Supplement, and the time series of meteorological parameters during specific pollution periods in Beijing in Fig. S6 in the Supplement.

Table S2 The meteorological parameters under specific conditions during the sampling periods

|         |                 | Temperature (°C) |        |        |        | Relative humidity (%) |        |        |        | Wind speed (m/s) |        |        |        |
|---------|-----------------|------------------|--------|--------|--------|-----------------------|--------|--------|--------|------------------|--------|--------|--------|
|         |                 | Summer           | Autumn | Winter | Spring | Summer                | Autumn | Winter | Spring | Summer           | Autumn | Winter | Spring |
| Beijing | Annual          | 28.0             | 18.0   | 1.5    | 14.0   | 51                    | 59     | 32     | 35     | 1.0              | 0.8    | 1.5    | 1.7    |
|         | C <sup>a</sup>  | 28.3             | 18.6   | 1.5    | 12.1   | 44                    | 46     | 21     | 32     | 1.2              | 1.2    | 2.3    | 2.3    |
|         | MP <sup>b</sup> | 27.4             | 18.7   | 2.3    | 14.2   | 57                    | 69     | 34     | 33     | 0.9              | 0.6    | 1.4    | 1.6    |

|              |                 |      |      |      |      |    |    |    |    |     |     |     |     |
|--------------|-----------------|------|------|------|------|----|----|----|----|-----|-----|-----|-----|
|              | HP <sup>c</sup> | 27.7 | 17.5 | 1.1  | 16.4 | 67 | 69 | 41 | 42 | 0.7 | 0.6 | 0.9 | 1.2 |
|              | D <sup>d</sup>  | 30.3 | 19.8 | 2.8  | 16.0 | 43 | 51 | 28 | 27 | 1.4 | 1.0 | 1.7 | 2.1 |
|              | N <sup>e</sup>  | 25.8 | 16.2 | 0.1  | 11.2 | 60 | 67 | 37 | 43 | 0.7 | 0.6 | 1.3 | 1.3 |
| Tianjin      | Annual          | 27.7 | 18.4 | 1.1  | 13.0 | 54 | 60 | 41 | 41 | 1.5 | 1.3 | 1.4 | 1.8 |
|              | C               | 28.6 | 18.9 | 1.5  | 11.2 | 47 | 61 | 31 | 39 | 1.6 | 1.4 | 1.8 | 2.1 |
|              | MP              | 27.2 | 19.1 | 1.1  | 13.3 | 59 | 61 | 40 | 44 | 1.4 | 1.1 | 1.6 | 1.8 |
|              | HP              | 28.4 | 16.9 | 1.7  | 13.4 | 66 | 53 | 46 | 40 | 1.2 | 1.2 | 1.1 | 1.5 |
|              | D               | 29.7 | 20.1 | 2.6  | 15.2 | 47 | 53 | 35 | 34 | 1.8 | 1.5 | 1.7 | 2.1 |
|              | N               | 25.7 | 16.6 | -0.4 | 10.9 | 62 | 69 | 45 | 48 | 1.2 | 1.0 | 1.2 | 1.5 |
| Shijiazhuang | Annual          | 26.9 | 17.9 | 1.0  | 13.8 | 63 | 75 | 41 | 46 | 1.2 | 0.9 | 1.0 | 1.5 |
|              | C               | 28.6 | 16.3 | 1.9  | 9.1  | 50 | 64 | 21 | 64 | 1.3 | 1.1 | 1.3 | 1.2 |
|              | MP              | 26.6 | 18.9 | 1.6  | 13.0 | 66 | 78 | 35 | 47 | 1.2 | 0.9 | 1.4 | 1.5 |
|              | HP              | 26.2 | 17.7 | 0.6  | 15.5 | 71 | 78 | 46 | 40 | 1.1 | 0.7 | 0.9 | 1.6 |
|              | D               | 29.2 | 19.6 | 3.0  | 16.0 | 54 | 68 | 36 | 39 | 1.4 | 1.1 | 1.2 | 1.9 |
|              | N               | 24.8 | 16.2 | -1.0 | 11.5 | 70 | 83 | 47 | 53 | 1.0 | 0.7 | 0.8 | 1.2 |
| Xinglong     | Annual          | 20.6 | 12.1 | -4.8 | 7.0  | 67 | 66 | 40 | 44 | 2.3 | 2.5 | 2.7 | 3.3 |
|              | C               | 20.6 | 12.1 | -5.0 | 6.5  | 61 | 58 | 35 | 30 | 2.1 | 2.6 | 2.9 | 3.4 |
|              | MP              | 19.7 | 14.0 | -3.1 | 8.9  | 80 | 68 | 42 | 52 | 2.5 | 3.3 | 2.6 | 3.4 |
|              | HP              | 21.5 | 13.8 | -4.9 | 8.9  | 85 | 74 | 79 | 66 | 2.7 | 2.4 | 1.4 | 3.6 |
|              | D               | 21.7 | 13.2 | -3.7 | 8.3  | 64 | 62 | 36 | 38 | 2.4 | 2.7 | 2.7 | 3.6 |
|              | N               | 19.4 | 10.9 | -5.8 | 5.5  | 70 | 71 | 43 | 50 | 2.1 | 2.3 | 2.7 | 3.1 |

<sup>a</sup> Clean days ( $PM_{2.5} < 75 \mu g/m^3$ ); <sup>b</sup> Moderate pollution days ( $75 \leq PM_{2.5} < 150 \mu g/m^3$ ); <sup>c</sup> Heavy pollution days ( $PM_{2.5} \geq 150 \mu g/m^3$ );

<sup>d</sup> Daytime; <sup>e</sup> Nighttime

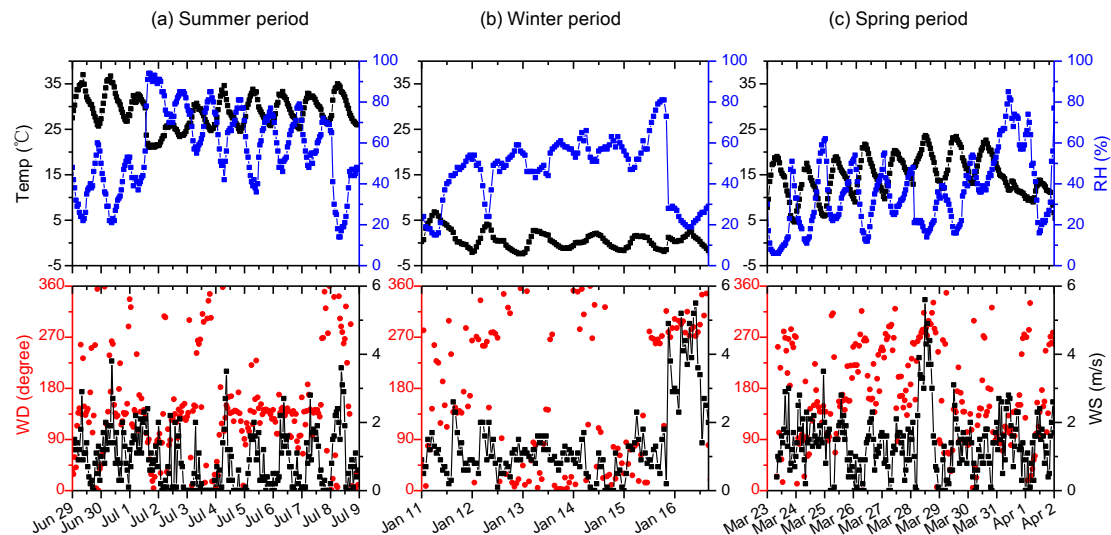

Figure S6. Time series variations of the meteorological parameters from Beijing during the specific pollution periods in summer (a), winter (b) and spring (c).

17. Page 22, Figure 9: Please add an instruction about “C, MP, HP”

Response: It has been added in the manuscript now.

18. Page 25, Section 3.4. Please add more information about the backward trajectory analysis.



Response: It has been added in Section 2.4 in Page 9, line 3–10 , as follows:

" The backward trajectory analysis method is widely applied to identify the potential source regions and transport pathways of air masses, especially for serious air pollution episodes (Gao et al., 2015; Hu et al., 2012; Zhang et al., 2014). In this study, 48 h backward trajectories terminated at a height of 100 m above ground level were calculated for the all four sampling sites using the Hybrid Single-Particle Lagrangian Integrated Trajectory (HYSPLIT 4.9) model developed by the U.S. National Oceanic and Atmospheric Administration/Air Resources Laboratory (NOAA/ARL). The trajectories were calculated every 12 h, with starting times at 8:00 and 20:00 local time (corresponding to each sampling) during the entire observational period. "

19. Page 25,line 6: "in three urban sites" should be "at ... sites"

Response: It has been revised in the manuscript.

20. Page 25, Figure 10: I believe the font in this figure is inconsistent. Please revise that.

Response: It has been revised as follows:

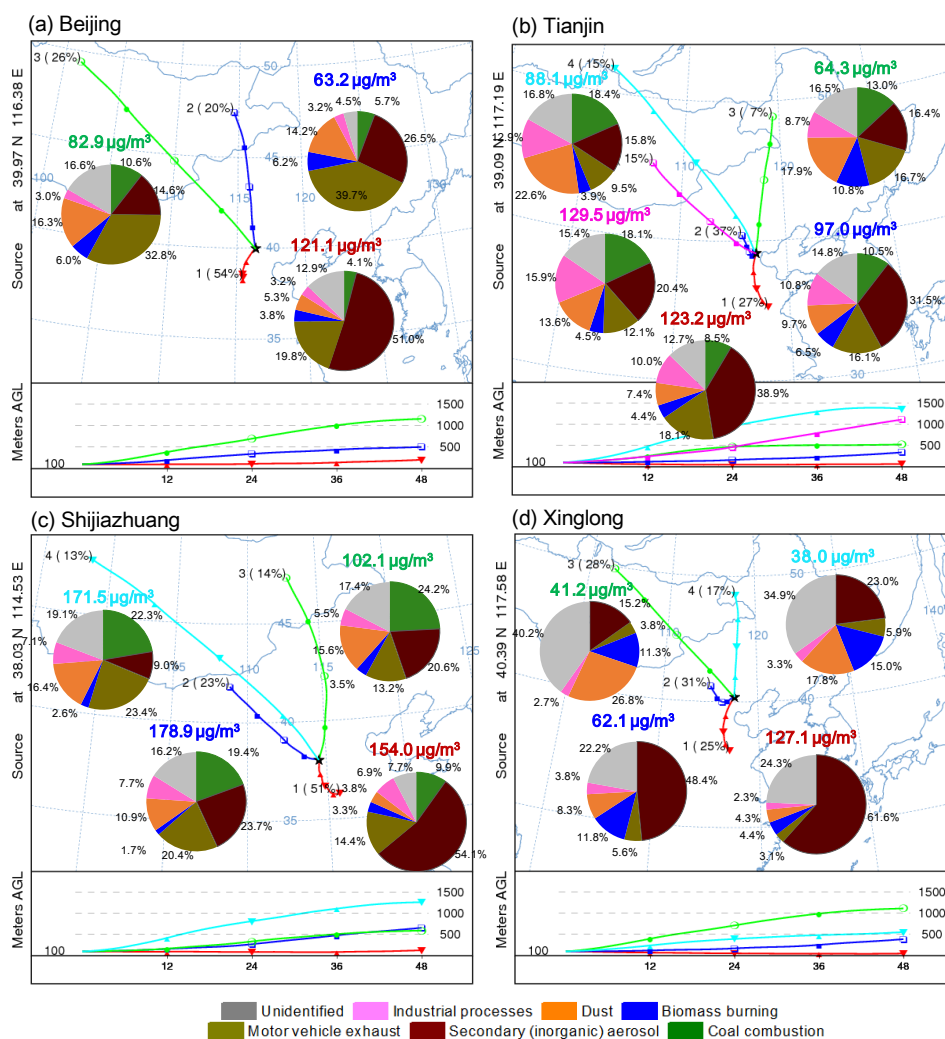

Figure 10. Source contributions resolved from the PMF at each 48 h backward trajectory cluster during the entire study period in Beijing (a), Tianjin (b), Shijiazhuang (c) and Xinglong (d)

21. Page 26, line 1-6: This part should be improved with a brief description of the chemical composition while mainly focusing on the seasonal characteristics of major components.

Response: It has been revised as follows (Page 27, line 5 to Page 28, line 4):

" In this study, the chemical compositions and emission sources of fine particulate matter (PM<sub>2.5</sub>) were comprehensively investigated at three urban sites (Beijing, Tianjin and Shijiazhuang) and a background site (Xinglong) in the Beijing-Tianjin-Hebei region. Severe PM<sub>2.5</sub> pollution was found at all three urban sites, especially in Shijiazhuang, and the background site was found to be relatively clean. The seasonal variations of the PM<sub>2.5</sub> concentrations in Xinglong were not significant due to the presence of fewer anthropogenic emissions, while at the urban sites, the lowest PM<sub>2.5</sub> values were observed in summer and the highest values were observed in winter, likely due to the prevalence of winter coal-fired heating and unfavorable meteorological conditions. The chemical compositions of PM<sub>2.5</sub> were similar at the four sites, and the major chemical components were organic matter, secondary inorganic ions (sulfate, nitrate, ammonium) and mineral dust. These components showed distinctive seasonal variabilities, which were closely related to chemical processes, emission sources and meteorological conditions. Organic matter and elemental carbon had the highest recorded values and contributions to PM<sub>2.5</sub> in winter, sulfate peaked in summer, while nitrate peaked in autumn, and mineral dust peaked in spring."

## References

- Elliot, A. J., Smith, S., Dobney, A., Thorne, J., Smith, G. E. and Vardoulakis, S.: Monitoring the effect of air pollution episodes on health care consultations and ambulance call-outs in England during March/April 2014: A retrospective observational analysis, *Environ. Pollut.*, 214(July), 903–911, doi:10.1016/j.envpol.2016.04.026, 2016.
- Gao, J., Tian, H., Cheng, K., Lu, L., Zheng, M., Wang, S., Hao, J., Wang, K., Hua, S., Zhu, C. and Wang, Y.: The variation of chemical characteristics of PM<sub>2.5</sub> and PM<sub>10</sub> and formation causes during two haze pollution events in urban Beijing, China, *Atmos. Environ.*, 107, 1–8, doi:10.1016/j.atmosenv.2015.02.022, 2015.
- Gu, D., Wang, Y., Smeltzer, C. and Liu, Z.: Reduction in NO<sub>x</sub> emission trends over China: Regional and seasonal variations, *Environ. Sci. Technol.*, 47(22), 12912–12919, doi:10.1021/es401727e, 2013.
- Han, B., Zhang, R., Yang, W., Bai, Z., Ma, Z. and Zhang, W.: Heavy haze episodes in Beijing during January 2013: Inorganic ion chemistry and source analysis using highly time-resolved measurements from an urban site, *Sci. Total Environ.*, 544, 319–329, doi:10.1016/j.scitotenv.2015.10.053, 2016.
- Hu, M., Peng, J., Sun, K., Yue, D., Guo, S., Wiedensohler, A. and Wu, Z.: Estimation of size-resolved ambient particle density based on the measurement of aerosol number, mass, and chemical size distributions in the winter in Beijing, *Env. Sci Technol*, 46(18), 9941–9947, doi:10.1021/es204073t, 2012.
- Liu, B., Yang, J., Yuan, J., Wang, J., Dai, Q., Li, T., Bi, X., Feng, Y., Xiao, Z., Zhang, Y. and Xu, H.: Source apportionment of atmospheric pollutants based on the online data by using PMF and ME2 models at a megacity, China, *Atmos. Res.*, 185, 22–31, doi:10.1016/j.atmosres.2016.10.023, 2017.
- Pan, Y., Wang, Y., Zhang, J., Liu, Z., Wang, L., Tian, S., Tang, G., Gao, W., Ji, D., Song, T. and Wang, Y.: Redefining the importance of nitrate during haze pollution to help optimize an emission control strategy, *Atmos. Environ.*, 141, 197–202, doi:10.1016/j.atmosenv.2016.06.035, 2016.
- Sun, Y. L., Jiang, Q., Xu, Y. S., Ma, Y., Zhang, Y. J., Liu, X. G., Li, W. J., Li, J., Wang, P. C., Wang, F. and Li, Z. Q.: Aerosol characterization over the North China Plain: Haze life cycle and biomass burning impacts in summer, *J. Geophys. Res. Atmos. Res.*, 121, 2508–2521, doi:10.1002/2015JD024261, 2016.

Tang, G. Q., Zhao, P. S., Wang, Y. H., Gao, W. K., Cheng, M. T., Xin, J. Y., Li, X. and Wang, Y. S.: Mortality and air pollution in Beijing: The long-term relationship, *Atmos. Environ.*, 150, 238–243, doi:10.1016/j.atmosenv.2016.11.045, 2017.

Tao, J., Zhang, L. M., Cao, J. J., Hsu, S. C., Xia, X. G., Zhang, Z., Lin, Z. J., Cheng, T. T. and Zhang, R. J.: Characterization and source apportionment of aerosol light extinction in Chengdu, southwest China, *Atmos. Environ.*, 95, 552–562, doi:10.1016/j.atmosenv.2014.07.017, 2014.

Wang, Y., Bao, S., Wang, S., Hu, Y., Shi, X., Wang, J., Zhao, B., Jiang, J., Zheng, M., Wu, M., Russell, A. G., Wang, Y. and Hao, J.: Local and regional contributions to fine particulate matter in Beijing during heavy haze episodes, *Sci. Total Environ.*, 580(December), 283–296, doi:10.1016/j.scitotenv.2016.12.127, 2017.

Wang, Y. H., Liu, Z. R., Zhang, J. K., Hu, B., Ji, D. S., Yu, Y. C. and Wang, Y. S.: Aerosol physicochemical properties and implications for visibility during an intense haze episode during winter in Beijing, *Atmos. Chem. Phys.*, 15(6), 3205–3215, doi:10.5194/acp-15-3205-2015, 2015.

Wu, D., Mao, J. T., Deng, X. J., Tie, X. X., Zhang, Y. H., Zeng, L. M., Li, F., Tan, H. B., Bi, X. Y., Huang, X. Y., Chen, J. and Deng, T.: Black carbon aerosols and their radiative properties in the Pearl River Delta region, *Sci. China, Ser. D Earth Sci.*, 52(8), 1152–1163, doi:10.1007/s11430-009-0115-y, 2009.

Wu, R., Dai, H. C., Geng, Y., Xie, Y., Masui, T., Liu, Z. Q. and Qian, Y. Y.: Economic Impacts from PM 2.5 Pollution-Related Health Effects: A Case Study in Shanghai, *Environ. Sci. Technol.*, acs.est.7b00026, doi:10.1021/acs.est.7b00026, 2017.

Wu, S., Deng, F., Wei, H., Huang, J., Wang, X., Hao, Y., Zheng, C., Qin, Y., Lv, H., Shima, M. and Guo, X.: Association of cardiopulmonary health effects with source-appointed ambient fine particulate in Beijing, China: A combined analysis from the healthy volunteer natural relocation (HVNR) study, *Environ. Sci. Technol.*, 48(6), 3438–3448, doi:10.1021/es404778w, 2014.

Xie, M., Piedrahita, R., Dutton, S. J., Milford, J. B., Hemann, J. G., Peel, J. L., Miller, S. L., Kim, S. Y., Vedal, S., Sheppard, L. and Hannigan, M. P.: Positive matrix factorization of a 32-month series of daily PM<sub>2.5</sub> speciation data with incorporation of temperature stratification, *Atmos. Environ.*, 65, 11–20, doi:10.1016/j.atmosenv.2012.09.034, 2013a.

Xie, M., Barsanti, K. C., Hannigan, M. P., Dutton, S. J. and Vedal, S.: Positive matrix factorization of PM<sub>2.5</sub> – eliminating the effects of gas/particle partitioning of semivolatile organic compounds, *Atmos. Chem. Phys.*, 13(15), 7381–7393, doi:10.5194/acp-13-7381-2013, 2013b.

Xin, J., Wang, Y., Pan, Y., Ji, D., Liu, Z., Wen, T., Wang, Y., Li, X., Sun, Y., Sun, J., Wang, P., Wang, G., Wang, X., Cong, Z., Song, T., Hu, B., Wang, L., Tang, G., Gao, W., Guo, Y., Miao, H., Tian, S. and Wang, L.: The campaign on atmospheric aerosol research network of China: CARE-China, *Bull. Am. Meteorol. Soc.*, 96(7), 1137–1155, doi:10.1175/BAMS-D-14-00039.1, 2015.

Yang, Y. R., Liu, X. G., Qu, Y., An, J. L., Jiang, R., Zhang, Y. H., Sun, Y. L., Wu, Z. J., Zhang, F., Xu, W. Q. and Ma, Q. X.: Characteristics and formation mechanism of continuous hazes in China: A case study during the autumn of 2014 in the North China Plain, *Atmos. Chem. Phys.*, 15(14), 8165–8178, doi:10.5194/acp-15-8165-2015, 2015.

Zhang, J. K., Sun, Y., Liu, Z. R., Ji, D. S., Hu, B., Liu, Q. and Wang, Y. S.: Characterization of submicron aerosols during a month of serious pollution in Beijing, 2013., *Atmos. Chem. Phys.*, 14, 2887–2903, doi:10.5194/acp-14-2887-2014, 2014.

Zhang, J. K., Wang, L. L., Wang, Y. H. and Wang, Y. S.: Submicron aerosols during the Beijing Asia-Pacific Economic Cooperation conference in 2014, *Atmos. Environ.*, 124, 224–231, doi:10.1016/j.atmosenv.2015.06.049, 2016.

Zhang, R., Jing, J., Tao, J., Hsu, S. C., Wang, G., Cao, J., Lee, C. S. L., Zhu, L., Chen, Z., Zhao, Y. and Shen, Z.:

Chemical characterization and source apportionment of PM<sub>2.5</sub> in Beijing: seasonal perspective, *Atmos. Chem. Phys.*, 13(14), 7053–7074, doi:10.5194/acp-13-7053-2013, 2013.

Zhang, R. Y., Wang, G. H., Guo, S., Zamora, M. L., Ying, Q., Lin, Y., Wang, W. gang, Hu, M. and Wang, Y.: Formation of urban fine particulate matter, *Chem Rev*, 115(10), 3803–3855, doi:10.1021/acs.chemrev.5b00067, 2015.

Zhao, B., Wang, P., Ma, J. Z., Zhu, S., Pozzer, A. and Li, W.: A high-resolution emission inventory of primary pollutants for the Huabei region, China, *Atmos. Chem. Phys.*, 12(1), 481–501, doi:10.5194/acp-12-481-2012, 2012.

Zhao, B., Wang, S. X., Liu, H., Xu, J. Y., Fu, K., Klimont, Z., Hao, J. M., He, K. B., Cofala, J. and Amann, M.: NO<sub>x</sub> emissions in China: Historical trends and future perspectives, *Atmos. Chem. Phys.*, 13(19), 9869–9897, doi:10.5194/acp-13-9869-2013, 2013.

Zhao, X. J., Zhang, X. L., Xu, X. F., Xu, J., Meng, W. and Pu, W. W.: Seasonal and diurnal variations of ambient PM<sub>2.5</sub> concentration in urban and rural environments in Beijing, *Atmos. Environ.*, 43(18), 2893–2900, doi:10.1016/j.atmosenv.2009.03.009, 2009.

Zong, Z., Wang, X., Tian, C., Chen, Y., Zhang, F., Li, C., Sun, J., Li, J. and Zhang, G.: First assessment of NO<sub>x</sub> sources at a regional background site in North China using isotopic analysis linked with modeling First assessment of NO<sub>x</sub> sources at a regional background site in North China using isotopic analysis linked with modeling, *Environ. Sci. Technol.*, 51(11), 5923–5931, doi:10.1021/acs.est.6b06316, 2017.

## Response to Anonymous Referee #2

Anonymous Referee #2

Interactive comment on “Chemical characterization and synergetic source apportionment of PM<sub>2.5</sub> at multiple sites in the Beijing-Tian-Hebei region, China” by Huang et al.

This paper describe the chemical characterization and source apportionment of PM<sub>2.5</sub> at four sites in the Beijing-Tianjin-Hebei (BTH) region, China. The topic of the paper is well suited for ACP, and the data itself are interesting. On the whole, the manuscript needs editing concerning the grammar and syntax by native English speaker. In addition, the manuscript suffers from many unclear statements. I have many points where more information is needed or where I disagree.

Specific comments:

Page 1, Line 20-34: The abstract could be improved greatly. The highlighted results in the abstract are not really exciting. I suggest the authors focus on the new findings on haze formation mechanism and the influence of regional transport.

Response: Thanks for the good suggestion, we have improved the abstract greatly by deleting less important information and focusing on the meaningful results about source variations in seasons, locations and at different pollution levels, and on the influence of regional transport. The abstract has been revised as follows:

" The simultaneous observation and analysis of atmospheric fine particles (PM<sub>2.5</sub>) on a regional scale is an important approach to develop control strategies for haze pollution. In this study, samples of filtered PM<sub>2.5</sub> were collected simultaneously at three urban sites (Beijing, Tianjin, and Shijiazhuang) and at a regional background site (Xinglong) in the Beijing-Tianjin-Hebei (BTH) region from June 2014 to April 2015. The PM<sub>2.5</sub> at the four sites mainly comprised organic matter, secondary inorganic ions (sulfate, nitrate and ammonium) and mineral dust. Positive matrix factorization (PMF) demonstrated that, on an annual basis, secondary inorganic aerosol was the largest PM<sub>2.5</sub> source in this region, accounting for 29.2–40.5% of the PM<sub>2.5</sub> mass at the urban sites; the second largest PM<sub>2.5</sub> source was primary emission of motor vehicle exhaust in Beijing (24.9%), whereas coal combustion in Tianjin (15.2%) and Shijiazhuang (17.3%), particularly in winter. Secondary inorganic aerosol play a vital role in the haze process, with the exception of the spring haze of Shijiazhuang and Tianjin, where the dust source was crucial. In addition to secondary transformations, local direct emissions (coal combustion and motor vehicle exhaust) significantly contribute to the winter haze at the urban sites. Moreover, with the aggravation of haze pollution, the OC/EC mass ratio of PM<sub>2.5</sub> decreased considerably and the nitrate-rich secondary aerosol increased during all four seasons in Beijing, both of which indicate that local motor vehicle emissions significantly contribute to the severe haze episodes of Beijing. To assess the impacts of regional transport on haze pollution, the PMF results were further processed with backward trajectory clusters analysis, revealing that haze pollution usually occurred when air masses originating from polluted industrial regions in the south prevailed and is characterized by high PM<sub>2.5</sub> loadings with considerable contributions from secondary aerosol. This study suggests that the control strategies to mitigate haze pollution in the BTH region should be focused on the reduction of gaseous precursor emissions from fossil fuel combustion (motor vehicle emissions in Beijing and coal combustion in Tianjin, Hebei and nearby provinces)."

Page 1, Line 32: Please define BTH at the first appearance. Abbreviations and acronyms are typically defined the first time they are used within the main text and then used throughout the remainder of the manuscript.

Response: We have added the full name of BTH and corrected the similar error in other places.

Page 1, Line 33-34: PMF was employed to apportion the source contribution to PM<sub>2.5</sub>. The sources of gaseous precursors are identified in this study?

Response: Actually, the sources of gaseous precursors were not identified in this study as their source apportionment is usually implemented by the method of emission inventory (Zhao et al., 2012), isotopic techniques (Zong et al., 2017) or air quality models, such as the Comprehensive Air Quality Model (CAMx) (Lu et al., 2016) and CMAQ model (Zhang et al., 2012). However, based on our dataset, we could not further apportion the secondary aerosols, therefore, we could not determine the exact contribution of the secondary transformation of gaseous precursors emitted by specific emission sources. That's what we want to investigate in the future.

Page 3, Lines 2-36: This part is not well written. The authors state that the studies on haze pollution in the BTH region have obtained fruitful and meaningful results. Please summarize the results on the chemical speciation, haze formation mechanism, emission sources, and influences of regional transport in North China. Meanwhile, the authors need to logically address why it is particularly important to do this study. The temporal and spatial characteristics can not be obtained based on single-site and short-term study. However, we still could get information from a lot of previous studies. What science questions need more research, particularly based on multiple-site and long-term study? Please clarify them.

Response: Thanks for the valuable suggestions to help us improve the instruction of this manuscript. Following these suggestions, first, we have further summarized the representative results related to the chemical speciation, haze formation mechanism, emission sources, influences of regional transport, as well as suggested mitigation strategies in North China, this part could be referred in Page 3, line 11–29 of the manuscript.

Second, we also logically address why it is particularly important to do this study, through summarizing the deficiency of previous literature researches and the existing scientific issues. Then, we have listed three aspects that why we need multiple-site and long-term research in Beijing-Tianjin-Hebei region (Page 3, line 32 to Page 4, line 4) .

The revised contents are added below:

" Extensive studies have been performed to investigate the formation mechanisms and emission sources of haze pollution in the BTH region and have obtained many valuable results (Du et al., 2014; Liu et al., 2016; Sun et al., 2013; Wang et al., 2014; Zhang et al., 2014; Zhao et al., 2013b). Massive anthropogenic emissions from diverse local sources, such as regional civil/industrial energy consumption, urban traffic, biomass burning and resuspended dust, and those transported from nearby provinces are widely regarded as the intrinsic reasons behind regional haze pollution events (Zhang et al., 2013; Zhao et al., 2012). Abnormal and unfavorable weather conditions also act as crucial factors in the formation of extensive and prolonged haze pollution events, such as the persistent haze event in January 2013 (Tao et al., 2014; Wang et al., 2014). In addition, many case studies, such as the winter regional haze events of 2010 (Zhao et al., 2013b) and 2013 (Sun et al., 2014; Wang et al., 2014), have also revealed that severe haze events are largely driven by the

high secondary production of sulfate, nitrate, ammonium and secondary organic aerosols (SOA), suggesting that aerosol chemistry plays a dominant role in haze evolution. Recent studies have reported a new efficient formation pathway for sulfate in the Beijing winter haze via reactive nitrogen chemistry in aerosol water during haze events (Cheng et al., 2016a; He et al., 2014; Wang et al., 2016, 2013). In terms of haze mitigation strategies, Guo et al. (2014) suggested that regulatory controls of gaseous emissions for volatile organic compounds and nitrogen oxides from local transportation and sulfur dioxide from regional industrial sources are the keys to reducing the urban PM level in Beijing. However, these studies were often conducted at single sites (mostly in Beijing) and/or for short periods (specific haze events or a certain season); long-term multisite studies are scarce (Li et al., 2017; Shen et al., 2016; Zhang et al., 2013; Zhao et al., 2013c; Zong et al., 2016). In such studies, further questions are raised: first, due to the relatively few studies in Tianjin and Hebei, especially with respect to the source explorations of PM<sub>2.5</sub>, we cannot fully understand the overall characteristics of the haze pollution in the BTH region; second, it is hard to directly compare the results between single-site studies to conduct a regional assessment as these studies covered different time periods and were conducted using different analytical approaches; third, the spatial and temporal variability of the PM<sub>2.5</sub> sources in this region have not been extensively investigated, particularly with respect to the evolutions of emission sources at different pollution levels and their spatial variability. The above imperfections can limit the understanding of the sources and evolution processes of haze pollution on a regional scale and complicate effective mitigation strategies."

Page 4, Lines 4-6: The authors state that they emphatically analyzed the chemical compositions and emission sources at different levels and the influence of air masses. Please highlight the new results or findings on them in the abstract.

Response: we have highlight it now in the abstract (Page 1, line 23–33), as follows:

" Secondary inorganic aerosol play a vital role in the haze process, with the exception of the spring haze of Shijiazhuang and Tianjin, where the dust source was crucial. In addition to secondary transformations, local direct emissions (coal combustion and motor vehicle exhaust) significantly contribute to the winter haze at the urban sites. Moreover, with the aggravation of haze pollution, the OC/EC mass ratio of PM<sub>2.5</sub> decreased considerably and the nitrate-rich secondary aerosol increased during all four seasons in Beijing, both of which indicate that local motor vehicle emissions significantly contribute to the severe haze episodes of Beijing. To assess the impacts of regional transport on haze pollution, the PMF results were further processed with backward trajectory clusters analysis, revealing that haze pollution usually occurred when air masses originating from polluted industrial regions in the south prevailed and is characterized by high PM<sub>2.5</sub> loadings with considerable contributions from secondary aerosol."

Page 4, Line 14: "These site reflect the atmospheric pollutions condition in this region"? Reword this sentence. Please clarify the sampling strategy.

Response: In this study, we selected four sampling sites in the Beijing-Tianjin-Hebei region, including three urban sites (Beijing, Tianjin and Shijiazhuang) and a regional background site (Xinglong). Beijing is the capital of China, and Tianjin is an economically developed municipality and is a coastal city. They have experienced rapid economic development and sharp increases in population, huge energy consumption and vehicle population, and thus induced a great amount of

pollutants; meanwhile, they are often suffered from the transported pollutants from heavily polluted areas (especially in the south direction). Therefore, Beijing and Tianjin have been reported as the most polluted megacities among 45 global megacities (Cheng et al., 2016b). As the capital of Hebei province, Shijiazhuang is a populated, industrialized and urbanized inland city. In Shijiazhuang, a great deal of coal are combusted for industrial processes and daily life, and the number of cars increases rapidly year by year, thus it is frequently reported as the most polluted city in the North China (Zhao et al., 2013a). Figure R1 shows the annual average concentrations of PM<sub>2.5</sub> and PM<sub>10</sub> of 2013 in major cities in Beijing-Tianjin-Hebei region (the data are provided by the National Environmental Bureau), from which we can see clearly that the PM concentrations were at a high level in Hebei province and extremely severe in Shijiazhuang.

The atmospheric pollution in these three cities is very serious, but has their own characteristics due to different energy and industrial structures. Therefore, they can represent the pollution characteristics of different urban types. In addition, for the aspect of specific selection of site location, we chose the sites that are affected by non-specific pollution sources while influenced by mixed emission sources, such as local motor vehicle emissions, coal combustion, road dust, industrial activities, cooking, transported pollutants, etc. These selected sites are considered to be representative of typical urban environments. Moreover, the comparative analysis of the city sites and the background site can reflect the contribution of anthropogenic sources to regional atmospheric pollution.

In addition, the sampling strategy has been briefly clarified in the manuscript in Page 4, line 19 to Page 5, line 4.

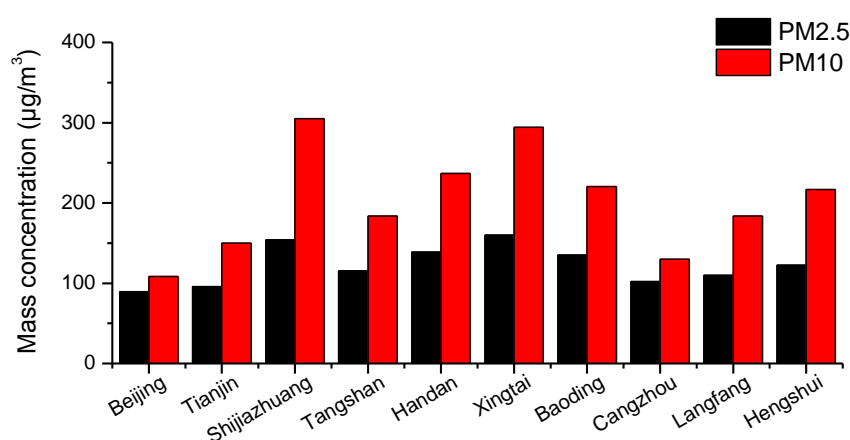

Figure R1 The annual average concentration of PM of 2013 in Beijing, Tianjin and major cities in Hebei province.

Page 4, Lines 27-28: Please clarify the distance between the filter sampling site and meteorological monitoring station in Tianjin, Shijiazhuang and Xinglong.

Response: The distance between the sampling site and meteorological monitoring station has been added now in Section 2.4. In addition, considering the nearby meteorological monitoring station of China Meteorological Administration (CMA) in Xinglong is still a few kilometers away from the sampling site and the data in April is missed, so we were actively seeking more appropriate meteorological data. Fortunately, we have gained the data from one meteorological monitoring station established by the Institute of Atmospheric Physics (IAP) of the Chinese Academy of Sciences (CAS) is right there, within 50 m of the sampling site in Xinglong. We conducted a



comparison between the two dataset and found significant differences existed, which may largely result from the long distance (a few kilometers) between the two meteorological monitoring stations. Therefore, we replaced the previous meteorological data gained from CMA with that from IAP to be more accurate, which could be referred in the Supplement Table S1.

Page 7, Line 11: The calculation of mineral dust was performed on the basis of six crustal element oxides. Why are Na, Mg, Zn not included in the Mineral dust? The calculations of Si, K and Fe are based on their ratios to Al in crustal dust. References should be added here.

Response: In this study, Na was not measured due to poor data quality, and the enrichment factor of Zn in PM<sub>2.5</sub> was much larger than 10, and exhibited much higher values on heavy pollution days (280–543 at the four sites) than that on clean days (73–201), indicating Zn was not primarily from natural sources and instead it came mainly from anthropogenic sources. Therefore, the calculation of mineral dust on the basis of six crustal element oxides (Al<sub>2</sub>O<sub>3</sub>, SiO<sub>2</sub>, CaO, Fe<sub>2</sub>O<sub>3</sub>, MnO<sub>2</sub> and K<sub>2</sub>O) was referred to the literature by Christoforou et al. (2000) and Chow et al. (1994), and neither of the two calculation methods took Na, Mg and Zn into account. This calculation method has been applied in the study of PM<sub>2.5</sub> in Beijing by He et al. (2001). In addition, considering the absence of measuring Si due to the material of filter (Quartz membrane), and some anthropogenic sources for K and Fe, the calculations of Si, K and Fe are based on their ratios to Al in crustal dust, the references of these ratio have been added in the revised paper, please refer to Section 2.3.1 in Page 7.

Page 8, Lines 26-29: The authors state that the cycles of haze episodes are primarily driven by fluctuations in meteorological conditions such as wind speed, relative humidity, air temperature, atmospheric stability, the height of the planetary boundary layer and air mass origins. Please show the temporal trend of these meteorological parameters in 4-7 days here or in Supporting information. In my opinion, these parameters have more effect on the diurnal variation of air pollutants rather than the 4-7 days' cycle.

Response: Actually, we quite agree that meteorological parameters have more effect on the diurnal variation of air pollutants than the periodic cycle of a few days. However, the meteorological conditions still represent one of the most critical parameters in regulating the cycles of pollution episodes in Beijing by influencing the regional transport, accumulation and scavenging of pollutants. Generally, local emissions show a steadier pattern, the sudden and apparent sharp increase in PM<sub>2.5</sub> concentration recorded in Beijing represents rapid recovery from an interruption to the continuous pollution accumulation over the region, rather than purely local chemical production or enhanced emissions (Zheng et al., 2015). Therefore, meteorological condition plays an external role in the occurrence of pollution episodes. Then, under unfavorable synoptic meteorological conditions, local aerosol chemical processes, most likely heterogeneous reactions, would cause the rapid growth of particle mass and lead to severe PM<sub>2.5</sub> development.

The PM mass concentration is primarily sensitive to the fluctuations in wind speed and planetary boundary layer (PBL) height (Yang et al., 2015). For example, Guo et al. (2014) observed that the wind variation correlates well with the PM<sub>2.5</sub> events in Beijing. During the transition and polluted periods, the wind direction and wind speed play an important role. In Beijing, the wind shifted from northerly to southerly with a considerably decreasing speed could result in air masses from the more populated southern industrial regions and a stagnant condition.

The 4-7 days' cycle of haze episodes in Beijing observed by Guo et al. (2014) has been also recorded by Zheng et al. (2015) and Jia et al. (2008). However, in this study, we did not delve into the periodic cycle of haze episodes, considering it is not the focus of this study and the variation of meteorological parameters and PM<sub>2.5</sub> mass concentration cannot be well matched due to that PM<sub>2.5</sub> mass concentrations in this study are the average of 11.5 hours.

Page 9, Lines 26-35: The extreme pollution events on Oct 5-11 and Jan 2-6, Jan 11-16 are worth a in-depth discussion.

Response: In this Section 3.1.2, we have briefly described the extreme pollution events during the observation, and in Section 3.4.1 we have added a in-depth discussion on the pollution events in summer, winter and spring, through analyzing the variation of chemical components during the specific haze episode in different seasons, the degree of secondary formation of sulfur and nitrogen, and the possible formation and development mechanism of haze pollution (Page 21, line 7 to Page 22, line 30). Considering we have missed so many samples due to imperfection of sampling, we have not deeply discussed the extreme pollution events on Oct 5–11, but cited the results of by Yang et al. (2015), who have also recorded this episode and other haze episodes in October 2014, and have analyzed these episodes in detail.

" From the above analysis, it can be seen that the chemical characteristics of haze pollution varied by season and site. The most prominent feature in summer was the intensive formation of SNA, which was observed simultaneously at the three urban sites on a regional scale during the period from Jun 29 to Jul 8 (Fig. 8a). The SNA contributed to the elevation of PM<sub>2.5</sub> concentration; SNA showed a substantial increase of a factor of 5.7, from 22.6 μg/m<sup>3</sup> during the clean period to 128.7 μg/m<sup>3</sup> during the haze episodes (Jul 2-N to Jul 4-N and Jul 5-N to Jul 7-N) in Beijing, and a corresponding increase of the contribution of SNA to PM<sub>2.5</sub> from 45.7% to 72.5%; the enhancement ratios were 4.4 and 3.4 in Tianjin and Shijiazhuang, respectively. The large increase in the concentrations and contributions of SNA during the haze process was observed in many previous studies and is mainly attributed to the enhanced secondary conversions via the enhanced heterogeneous reactions under relatively high humidity conditions during the haze periods (Fig. S6, averaging 67% during haze episodes and 37% during clean periods in summer in Beijing, as measured in this study) (Huang et al., 2016; Sun et al., 2013; Wang et al., 2012; Yang et al., 2015). The degree of secondary formation of sulfate and nitrate is commonly estimated using the sulfur oxidation ratio ( $SOR = \frac{n-SO_4^{2-}}{n-SO_4^{2-} + n-SO_2}$ , where n refers to molar concentration) and the nitrogen oxidation ratio ( $NOR = \frac{n-NO_3^-}{n-NO_3^- + n-NO_2}$ ), respectively (Huang et al., 2016; Zhao et al., 2013b). Higher values of the SOR and NOR indicate that more gaseous SO<sub>2</sub> and NO<sub>2</sub> would be oxidized to sulfate and nitrate in the atmosphere. In this study, the SOR and NOR were significantly elevated during the increases of PM<sub>2.5</sub> concentrations during the summer period and remained at a high level during haze episodes in Beijing (averaging 0.92 for SOR and 0.38 for NOR), Tianjin (0.83 and 0.41) and Shijiazhuang (0.65 and 0.44). In autumn, Yang et al. (2015) also revealed that the intense secondary formation of SNA contributed most of the formation of the hazes in October 2014, with the SOR and NOR values increasing considerably during the haze episodes. Similar variations were also observed in winter, but the formation of SNA in winter was much weaker than that in summer and autumn, with SOR values of only 0.18–0.35 during the regional haze episode (Jan 13 to 15) and NOR values of 0.20–0.22 at the three urban sites. However, the increases of the SNA concentrations were still significant during the winter haze

episode. In addition, the increase in OM was pronounced during the regional haze episode in winter at the three urban sites, exhibiting the highest OM values during this episode with average values of 57.3, 51.8 and 133.4  $\mu\text{g}/\text{m}^3$  in Beijing, Tianjin and Shijiazhuang, respectively, which were 3.5, 4.1 and 5.9 times of those during the clean periods, while the enhancement ratio was only 1.1–1.4 in summer period. During the winter haze episode, SNA and OM both increased substantially and dominated the  $\text{PM}_{2.5}$ , such that the respective contributions of SNA and OM were 42.6% and 26.1% in Beijing, 53.8% and 23.3% in Tianjin, and 43.2% and 37.0% in Shijiazhuang. The phenomenon of the significant increase of SNA and OM in winter haze episode was also observed by Zhao et al.(2013c) and (Huang et al., 2014), indicating that the winter haze may be largely driven by secondary aerosol formation, which could be identified as a common characteristic of winter pollution in this region. Compared to winter, the SOR and NOR values increased on the whole in spring, but their variations, as well as the variations of SNA and OM, had no apparent regular connection with the fluctuation of  $\text{PM}_{2.5}$ , especially in Tianjin and Shijiazhuang. In contrast to those observed in summer and winter, the most striking feature of spring pollution was the enhanced contribution of mineral dust; during the regional dust-haze episode from Mar 29-D to 30-N, the contribution of the mineral dust even reached 60.3% in Shijiazhuang, 51.7% in Tianjin and 47.8% in Beijing on Mar 29-D under the conditions of a strong northerly wind (Fig. S6). Subsequently, the mineral dust decreased while SNA rose gradually with the increase of relative humidity and the shift of the wind direction (Fig. 8 and Fig. S6), and the contribution of SNA to  $\text{PM}_{2.5}$  rose to 61.3%, 53.9% and 55.0% on Mar 30-N in Beijing, Tianjin and Shijiazhuang, respectively, again exhibiting secondary pollution characteristics."

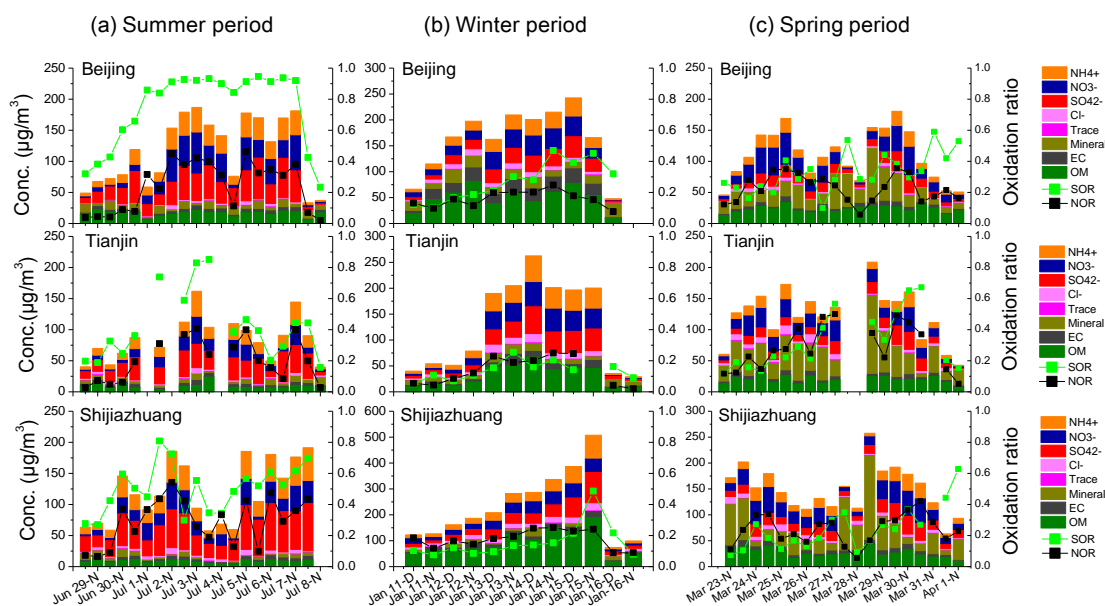

Figure 8. The evolutions of the chemical species, sulfur oxidation rate (SOR) and nitrogen oxidation rate (NOR) in the specific pollution periods in summer (a), winter (b) and spring (c) at urban sites. D: daytime; N: nighttime

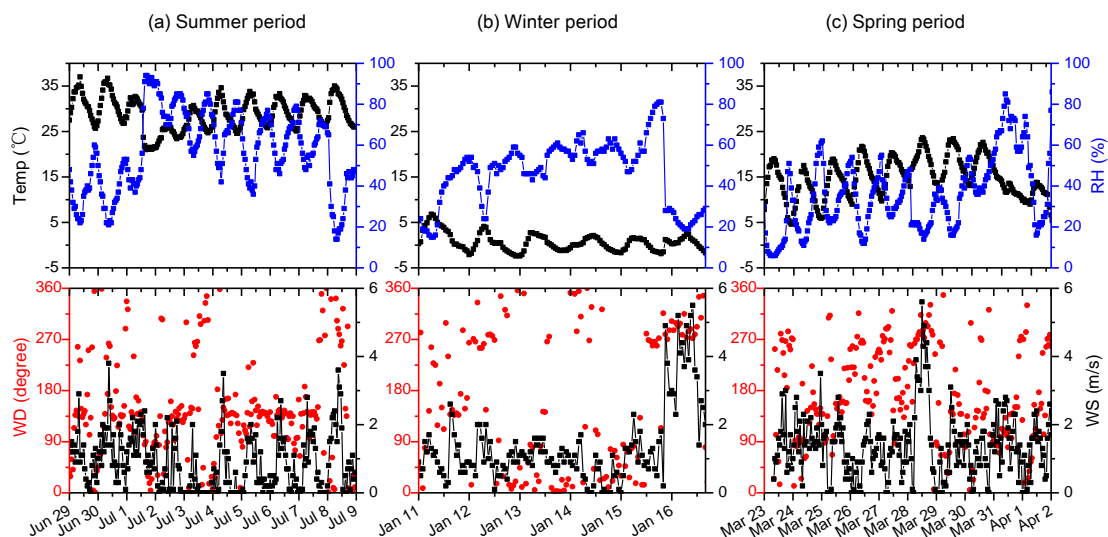

Figure S6. Time series variations of the meteorological parameters from Beijing during the specific pollution periods in summer (a), winter (b) and spring (c).

Page 10, Line 9: Shijiazhuang recorded high relative humidity and low wind speeds. It is usual or not from the historical record. Please clarify.

Response: In this study, higher relative humidity and lower wind speeds were recorded in Shijiazhuang than that in Tianjin and Beijing. This is usual from the historical record after statistical analysis of the data gained from the airport sites in the website of <https://www.wunderground.com/> from 2004 to 2014, the monthly average values of relative humidity and wind speed are shown in Fig R2. It could be clearly seen lower wind speed in Shijiazhuang than that in Beijing and Tianjin, the average wind speed during 2004–2014 in Shijiazhuang was 2.2 m/s, while 3.0 m/s in Beijing and 3.3 m/s in Tianjin. The differences in relative humidity are not significant between these three sites, however, from the average values during 2004–2014, the relative humidity was 61% in Shijiazhuang and Tianjin, and 56% in Beijing.

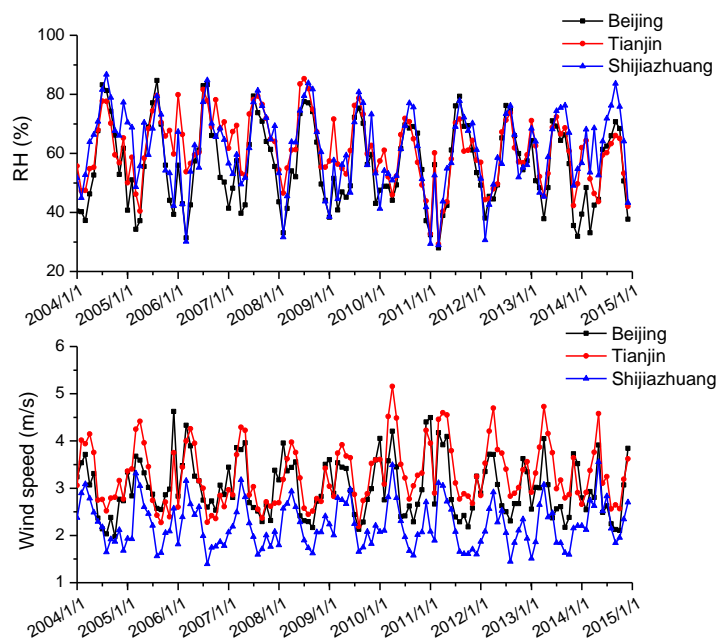

Figure R2 Monthly mean variations of relative humidity (RH) and wind speed from 2004 to 2014 at the airport sites in Beijing, Tianjin and Shijiazhuang

Page 11, Lines 10-21: Please provide the standard deviation of the ratio of  $\text{NO}_3^-/\text{SO}_4^{2-}$  in four sampling sites. The data reported here is annual average value? Please clarify.

Response: Even though the annual average value of  $\text{NO}_3^-/\text{SO}_4^{2-}$  mass ratio is more reasonable, considering the comparison with previous studies, the mass ratio of  $\text{NO}_3^-/\text{SO}_4^{2-}$  reported here is calculated based on the annual average concentration of  $\text{NO}_3^-$  and  $\text{SO}_4^{2-}$  as did by Zhao et al. (2013b). The results of the two calculation methods are very close in this study. Therefore, there is no standard deviation for the ratio of  $\text{NO}_3^-/\text{SO}_4^{2-}$ . In order to avoid such ambiguity, we have clarified this in the revised paper.

Page 12, Lines 16-17: The authors state that strengthened burning activities may occur at night because of the higher night/day ratios of EC and  $\text{Cl}^-$  than that of  $\text{PM}_{2.5}$ . Actually the photochemical reaction of secondary species and the boundary layer variation also could result in the higher night/day ratio of primary PM. Please provide more evidences to support this statement.

Response: Thank the referee for pointing out this. The statement of "strengthened burning activities may occur at night, as the night/day ratios of EC and  $\text{Cl}^-$ , ... , were higher than those of  $\text{PM}_{2.5}$ ." was only based on speculation, and we ignored the important factor that the photochemical reaction of secondary species and the boundary layer variation also could result in the higher night/day ratio of primary PM. Therefore, we have deleted this statement now.

Page 12, Lines 29-31: Please provide the meteorological parameters at day and night in the four sites in the supporting information to support this statement.

Response: It has been added in Table S2 in the Supplement, and the meteorological parameters at different pollution level in each season have also added in Table S2.

Page 15: I still think the analysis on the whole pollution processes particularly the extreme pollution events could get more information on haze formation mechanism than that of the different pollution levels.

Response: Thanks for this good suggestion. We agree that the study of a whole pollution processes could get more information about the haze formation mechanism and evolution process during specific haze pollution event. Therefore, even though we mainly aimed to reveal the average state of haze pollution in the BTH region in this study, the analysis on the whole severe pollution processes is still necessary. Therefore, in addition to the evolution of chemical components at different pollution levels during the entire observation period from 2014–2015 and in each season, we added the analysis on the whole pollution processes in summer (Jun 29 to Jul 8), winter (Jan 11 to 16) and spring (Mar 23 to Apr 1). The variation of chemical components, the sulfur oxidation ratio and nitrogen oxidation ratio are presented in Figure 8, and the time series of meteorological parameters during the three periods are also given in Figure S6 in the Supplement. The added contents can be referred to from Page 21, line 7 to Page 22, line 30).

Page 15, Line 32: The OC/EC ratio increases with the increasing development of haze pollution? It is different from the statement in Lines 19-20. Is there any study on the secondary organic

carbon in the wintertime of Beijing and Shijiazhuang? Maybe the sources affect the OC/EC ratio in different pollution levels. Again, the discussion on the specific pollution process will avoid this bias associated with emission sources.

Response: We are sorry for our carelessness. Actually, the OC/EC mass ratio in Beijing decreased with the increasing development of haze pollution. The wrong presentation has been revised now.

The formation of secondary organic carbon and the source changes at different pollution levels both can affect the OC/EC ratio. There are a lot of studies on the secondary organic carbon in the wintertime of Beijing, but very few in Shijiazhuang. Therefore, the speculation about the reason for the increase of OC/EC ratio in Shijiazhuang lacks accurate evidence, and thus we decided to delete related comments in the manuscript.

Page 16, Lines 22-25: I strongly suggest to discuss the differences between the spring haze and winter haze. The formation mechanism may be totally different.

Response: According to this suggestion, we conducted the discussion on the differences between the spring haze and winter haze. Just as the referee predicted, the formation mechanisms are totally different, the winter haze was mainly formed by local processes (local direct emissions and secondary transformation), while dust drove the formation of spring haze, especially at Shijiazhuang and Tianjin. The related discussion are presented as below (Page 23, line 21 to Page 24, line 29):

" In contrast to background site, the emission sources and generation mechanisms of haze pollution were more complex at the urban sites, especially in winter, as the primary emissions, such as the motor vehicle exhaust, coal combustion and industrial processes were also the main sources of heavy pollution in winter. As the main fuel for winter heating in northern China, the contribution of coal combustion to  $PM_{2.5}$  mainly occurred in winter and was key to the heavy pollution in winter in urban areas, as the contribution increases with increasing pollution levels. In Tianjin and Shijiazhuang, this process contributed nearly 30% to the  $PM_{2.5}$  on heavy pollution days and contributed even more when considering the secondary formation of gaseous precursors emitted by coal combustion. Moreover, the primary emissions of motor vehicles also exerted a remarkable impact on the winter haze pollution, accounting for 26.1% of  $PM_{2.5}$  on heavy pollution days in Beijing, and accounting for more when the secondary conversion of gaseous pollutants in vehicle exhaust are considered, as nitrate-rich secondary aerosol increased from 2.9% on clean days to 19.5% on heavy pollution days during the winter period. On hazy days, low visibility could aggravate urban traffic congestion during rush hour, thus causing more pollutants to be emitted by motor vehicles operating in these conditions (Zhang et al., 2011). Therefore, the winter haze was mainly formed by local processes (local direct emissions and secondary transformation).

In spring, the effect of dust source was highlighted at the urban sites. Most notably, in Shijiazhuang, the mineral dust source significantly contributed to the aerosol pollution process, as its contribution to  $PM_{2.5}$  continuously increased from 9.7% on clean days to 18.6% on moderate pollution days to 22.9% on heavy pollution days. However, along with the increase in pollution levels, the ratio of local road dust source to the overall dust source decreased from 81.6% (on clean days) to 50% (on pollution days), thus reflecting the significant impact of the long-range transport of the northwest dust on the spring aerosol pollution in Shijiazhuang. Differing from the increase of relative humidity during haze episodes of the other seasons, the relative humidity decreased continuously from 64% (clean days) to 47% (moderate pollution days) and to 40%

(heavy pollution days) in spring in Shijiazhuang (Table S2). Therefore, the heterogeneous reactions promoted by enhanced water vapor may not be the spring haze formation mechanism in Shijiazhuang, as the contribution of secondary inorganic aerosol decreased remarkably during the haze episode (Fig. 9 and Fig. S5). In contrast, the wind speed and the contribution of the dust source significantly increased during the spring haze period in Shijiazhuang. A similar but much milder pattern (except in terms of wind speed) was also recorded in Tianjin. Therefore, dust pollution, which was mainly the result of long-range transported soil dust and local road dust, contributed to the spring haze in Shijiazhuang and Tianjin."

Page 21, Lines 19-page 22, Line 19: The authors should consider incorporating this discussion into the other sections of the manuscript so that comparisons are made when results are discussed.  
Response: Thanks for the good suggestion. We have merged this part (now Section 3.4.2) with the evolution of chemical components (now Section 3.4.1) into Section 3.4. Please refer to the revised manuscript.

## References

- Cheng, Y. F., Zheng, G. J., Wei, C., Mu, Q., Zheng, B., Wang, Z. B., Gao, M., Zhang, Q., He, K. B., Carmichael, G., Po schl, U. and Su, H.: Reactive nitrogen chemistry in aerosol water as a source of sulfate during haze events in China, *Sci. Adv.*, 2(12), e1601530, doi:10.1126/sciadv.1601530, 2016a.
- Cheng, Z., Luo, L., Wang, S., Wang, Y., Sharma, S., Shimadera, H., Wang, X., Bressi, M., de Miranda, R. M., Jiang, J., Zhou, W., Fajardo, O., Yan, N. and Hao, J.: Status and characteristics of ambient PM<sub>2.5</sub> pollution in global megacities, *Environ. Int.*, 89–90, 212–221, doi:10.1016/j.envint.2016.02.003, 2016b.
- Chow, J. C., Watson, J. G., Fujita, E. M., Lu, Z., Lawson, D. R. and Ashbaugh, L. L.: Temporal and spatial variations of PM<sub>2.5</sub> and PM<sub>10</sub> aerosol in the Southern California air quality study, *Atmos. Environ.*, 28(12), 2061–2080, doi:10.1016/1352-2310(94)90474-X, 1994.
- Christoforou, C. S., Salmon, L. G., Hannigan, M. P., Solomon, P. A. and Cass, G. R.: Trends in Fine Particle Concentration and Chemical Composition in Southern California, *J. Air Waste Manage. Assoc.*, 50(1), 43–53, doi:10.1080/10473289.2000.10463985, 2000.
- Du, Z., He, K., Cheng, Y., Duan, F., Ma, Y., Liu, J., Zhang, X., Zheng, M. and Weber, R.: A yearlong study of water-soluble organic carbon in Beijing I: Sources and its primary vs. secondary nature, *Atmos. Environ.*, 92, 514–521, doi:10.1016/j.atmosenv.2014.04.060, 2014.
- Guo, S., Hu, M., Zamora, M. L., Peng, J., Shang, D., Zheng, J., Du, Z., Wu, Z., Shao, M., Zeng, L., Molina, M. J. and Zhang, R.: Elucidating severe urban haze formation in China., *Proc. Natl. Acad. Sci. U. S. A.*, 111(49), 17373–8, doi:10.1073/pnas.1419604111, 2014.
- He, H., Wang, Y. S., Ma, Q. X., Ma, J. Z., Chu, B. W., Ji, D., Tang, G. Q., Liu, C., Zhang, H. X. and Hao, J. M.: Mineral dust and NO<sub>x</sub> promote the conversion of SO<sub>2</sub> to sulfate in heavy pollution days, *Sci. Rep.*, 4(2), 1–6, doi:10.1038/srep04172, 2014.
- He, K., Yang, F., Ma, Y., Zhang, Q., Yao, X., Chan, C. K., Cadle, S., Chan, T. and Mulawa, P.: The characteristics of PM<sub>2.5</sub> in Beijing, China, *Atmos. Environ.*, 35, 4959–4970, 2001.
- Huang, R. J., Zhang, Y., Bozzetti, C., Ho, K. F., Cao, J. J., Han, Y., Daellenbach, K. R., Slowik, J. G., Platt, S. M., Canonaco, F., Zotter, P., Wolf, R., Pieber, S. M., Bruns, E. A., Crippa, M., Ciarelli, G., Piazzalunga, A., Schwikowski, M., Abbaszade, G., Schnelle-Kreis, J., Zimmermann, R., An, Z., Szidat, S., Baltensperger, U., El Haddad, I. and Prevot, A. S.: High secondary aerosol contribution to particulate pollution during haze events in

China, *Nature*, 514(7521), 218–222, doi:10.1038/nature13774, 2014.

Huang, X. J., Liu, Z. R., Zhang, J. K., Wen, T. X., Ji, D. S. and Wang, Y. S.: Seasonal variation and secondary formation of size-segregated aerosol water-soluble inorganic ions during pollution episodes in Beijing, *Atmos. Res.*, 168(September), 70–79, doi:10.1016/j.atmosres.2015.08.021, 2016.

Jia, Y., Rahn, K. A., He, K., Wen, T. and Wang, Y.: A novel technique for quantifying the regional component of urban aerosol solely from its sawtooth cycles, *J. Geophys. Res. Atmos.*, 113(D21309), 1–16, doi:10.1029/2008JD010389, 2008.

Li, J., Du, H. Y., Wang, Z. F., Sun, Y. Le, Yang, W. Y., Li, J. J., Tang, X. and Fu, P. Q.: Rapid formation of a severe regional winter haze episode over a mega-city cluster on the North China Plain, *Environ. Pollut.*, 1–11, doi:10.1016/j.envpol.2017.01.063, 2017.

Liu, Z. R., Hu, B., Zhang, J. K., Yu, Y. C. and Wang, Y. S.: Characteristics of aerosol size distributions and chemical compositions during wintertime pollution episodes in Beijing, *Atmos. Res.*, 168(August 2015), 1–12, doi:10.1016/j.atmosres.2015.08.013, 2016.

Lu, X., Yao, T., Li, Y., Fung, J. C. H. and Lau, A. K. H.: Source apportionment and health effect of NO<sub>x</sub> over the Pearl River Delta region in southern China, *Environ. Pollut.*, 212(May), 135–146, doi:10.1016/j.envpol.2016.01.056, 2016.

Shen, R. R., Schäfer, K., Schnelle-Kreis, J., Shao, L. Y., Norra, S., Kramar, U., Michalke, B., Abbaszade, G., Streibel, T., Fricker, M., Chen, Y., Zimmermann, R., Emeis, S. and Schmid, H. P.: Characteristics and sources of PM in seasonal perspective - A case study from one year continuously sampling in Beijing, *Atmos. Pollut. Res.*, 7(2), 235–248, doi:10.1016/j.apr.2015.09.008, 2016.

Sun, Y., Jiang, Q., Wang, Z., Fu, P., Li, J., Yang, T. and Yin, Y.: Investigation of the sources and evolution processes of severe haze pollution in Beijing in January 2013, *J. Geophys. Res.*, 119(7), 4380–4398, doi:10.1002/2014JD021641, 2014.

Sun, Y. L., Wang, Z. F., Fu, P. Q., Yang, T., Jiang, Q., Dong, H. B., Li, J. and Jia, J. J.: Aerosol composition, sources and processes during wintertime in Beijing, China, *Atmos. Chem. Phys.*, 13(9), 4577–4592, doi:10.5194/acp-13-4577-2013, 2013.

Tao, M., Chen, L., Xiong, X., Zhang, M., Ma, P., Tao, J. and Wang, Z.: Formation process of the widespread extreme haze pollution over northern China in January 2013: Implications for regional air quality and climate, *Atmos. Environ.*, 98, 417–425, doi:10.1016/j.atmosenv.2014.09.026, 2014.

Tian, S. L., Pan, Y. P. and Wang, Y. S.: Size-resolved source apportionment of particulate matter in urban Beijing during haze and non-haze episodes, *Atmos. Chem. Phys.*, 16(1), 1–19, doi:10.5194/acp-16-1-2016, 2016.

Wang, G., Zhang, R., Gomez, M. E., Yang, L., Levy Zamora, M., Hu, M., Lin, Y., Peng, J., Guo, S., Meng, J., Li, J., Cheng, C., Hu, T., Ren, Y., Wang, Y., Gao, J., Cao, J., An, Z., Zhou, W., Li, G., Wang, J., Tian, P., Marrero-Ortiz, W., Secret, J., Du, Z., Zheng, J., Shang, D., Zeng, L., Shao, M., Wang, W., Huang, Y., Wang, Y., Zhu, Y., Li, Y., Hu, J., Pan, B., Cai, L., Cheng, Y., Ji, Y., Zhang, F., Rosenfeld, D., Liss, P. S., Duce, R. A., Kolb, C. E. and Molina, M. J.: Persistent sulfate formation from London Fog to Chinese haze., *Proc. Natl. Acad. Sci. U. S. A.*, 113(48), 13630–13635, doi:10.1073/pnas.1616540113, 2016.

Wang, X. F., Wang, W. X., Yang, L. X., Gao, X. M., Nie, W., Yu, Y. C., Xu, P. J., Zhou, Y. and Wang, Z.: The secondary formation of inorganic aerosols in the droplet mode through heterogeneous aqueous reactions under haze conditions, *Atmos. Environ.*, 63, 68–76, doi:10.1016/j.atmosenv.2012.09.029, 2012.

Wang, Y., Yao, L., Wang, L., Liu, Z., Ji, D., Tang, G., Zhang, J., Sun, Y., Hu, B. and Xin, J.: Mechanism for the formation of the January 2013 heavy haze pollution episode over central and eastern China, *Sci. China Earth Sci.*, 57(1), 14–25, doi:10.1007/s11430-013-4773-4, 2013.

Wang, Y. S., Yao, L., Wang, L. L., Liu, Z. R., Ji, D. S., Tang, G. Q., Zhang, J. K., Sun, Y., Hu, B. and Xin, J. Y.:



Mechanism for the formation of the January 2013 heavy haze pollution episode over central and eastern China, *Sci. China Earth Sci.*, 57(1), 14–25, doi:10.1007/s11430-013-4773-4, 2014.

Yang, Y. R., Liu, X. G., Qu, Y., An, J. L., Jiang, R., Zhang, Y. H., Sun, Y. L., Wu, Z. J., Zhang, F., Xu, W. Q. and Ma, Q. X.: Characteristics and formation mechanism of continuous hazes in China: A case study during the autumn of 2014 in the North China Plain, *Atmos. Chem. Phys.*, 15(14), 8165–8178, doi:10.5194/acp-15-8165-2015, 2015.

Zhang, H., Li, J., Ying, Q., Yu, J. Z., Wu, D., Cheng, Y., He, K. and Jiang, J.: Source apportionment of PM 2.5 nitrate and sulfate in China using a source-oriented chemical transport model, *Atmos. Environ.*, 62(July 2017), 228–242, doi:10.1016/j.atmosenv.2012.08.014, 2012.

Zhang, J. K., Sun, Y., Liu, Z. R., Ji, D. S., Hu, B., Liu, Q. and Wang, Y. S.: Characterization of submicron aerosols during a month of serious pollution in Beijing, 2013., *Atmos. Chem. Phys.*, 14, 2887–2903, doi:10.5194/acp-14-2887-2014, 2014.

Zhang, K., Batterman, S. and Dion, F.: Vehicle emissions in congestion: Comparison of work zone, rush hour and free-flow conditions, *Atmos. Environ.*, 45(11), 1929–1939, doi:10.1016/j.atmosenv.2011.01.030, 2011.

Zhang, R., Jing, J., Tao, J., Hsu, S. C., Wang, G., Cao, J., Lee, C. S. L., Zhu, L., Chen, Z., Zhao, Y. and Shen, Z.: Chemical characterization and source apportionment of PM<sub>2.5</sub> in Beijing: seasonal perspective, *Atmos. Chem. Phys.*, 13(14), 7053–7074, doi:10.5194/acp-13-7053-2013, 2013.

Zhao, B., Wang, P., Ma, J. Z., Zhu, S., Pozzer, A. and Li, W.: A high-resolution emission inventory of primary pollutants for the Huabei region, China, *Atmos. Chem. Phys.*, 12(1), 481–501, doi:10.5194/acp-12-481-2012, 2012.

Zhao, P. S., Dong, F., He, D., Zhao, X. J., Zhang, X. L., Zhang, W. Z., Yao, Q. and Liu, H. Y.: Characteristics of concentrations and chemical compositions for PM<sub>2.5</sub> in the region of Beijing, Tianjin, and Hebei, China, *Atmos. Chem. Phys.*, 13(9), 4631–4644, doi:10.5194/acp-13-4631-2013, 2013a.

Zhao, X. J., Zhao, P. S., Xu, J., Meng, W., Pu, W. W., Dong, F., He, D. and Shi, Q. F.: Analysis of a winter regional haze event and its formation mechanism in the North China Plain, *Atmos. Chem. Phys.*, 13(11), 5685–5696, doi:10.5194/acp-13-5685-2013, 2013b.

Zheng, G. J., Duan, F. K., Su, H., Ma, Y. L., Cheng, Y., Zheng, B., Zhang, Q., Huang, T., Kimoto, T., Chang, D., Pöschl, U., Cheng, Y. F. and He, K. B.: Exploring the severe winter haze in Beijing: The impact of synoptic weather, regional transport and heterogeneous reactions, *Atmos. Chem. Phys.*, 15(6), 2969–2983, doi:10.5194/acp-15-2969-2015, 2015.

Zong, Z., Wang, X. P., Tian, C. G., Chen, Y. J., Qu, L., Ji, L., Zhi, G. R., Li, J. and Zhang, G.: Source apportionment of PM<sub>2.5</sub> at a regional background site in North China using PMF linked with radiocarbon analysis: Insight into the contribution of biomass burning, *Atmos. Chem. Phys.*, 16(17), 11249–11265, doi:10.5194/acp-16-11249-2016, 2016.

Zong, Z., Wang, X., Tian, C., Chen, Y., Zhang, F., Li, C., Sun, J., Li, J. and Zhang, G.: First assessment of NO<sub>x</sub> sources at a regional background site in North China using isotopic analysis linked with modeling First assessment of NO<sub>x</sub> sources at a regional background site in North China using isotopic analysis linked with modeling, *Environ. Sci. Technol.*, 51(11), 5923–5931, doi:10.1021/acs.est.6b06316, 2017.

# Chemical characterization and source **identification** of PM<sub>2.5</sub> at multiple sites in the Beijing-Tianjin-Hebei region, China

Xiaojuan Huang<sup>1,2</sup>, Zirui Liu<sup>1,3\*</sup>, Jingyun Liu<sup>1</sup>, Bo Hu<sup>1</sup>, Tianxue Wen<sup>1</sup>, Guiqian Tang<sup>1</sup>, Junke Zhang<sup>1</sup>, Fangkun Wu<sup>1</sup>, Dongsheng Ji<sup>1</sup>, Lili Wang<sup>1</sup>, Yuesi Wang<sup>1,3\*</sup>

5 <sup>1</sup>State Key Laboratory of Atmospheric Boundary Layer Physics and Atmospheric Chemistry (LAPC), Institute of Atmospheric Physics, Chinese Academy of Sciences, Beijing, China

<sup>2</sup>Plateau Atmosphere and Environment Key Laboratory of Sichuan Province, **School** of Atmospheric Sciences, Chengdu University of Information Technology, Chengdu, China

10 <sup>3</sup>Center for Excellence in Regional Atmospheric Environment, Institute of Urban Environment, Chinese Academy of Sciences, Xiamen, China

\*Corresponding author: Zirui Liu (liuzirui@mail.iap.ac.cn); Yuesi Wang (wys@mail.iap.ac.cn)

**ABSTRACT:** The simultaneous observation and analysis of atmospheric fine particles (PM<sub>2.5</sub>) on a regional scale is an important approach to develop control strategies for haze pollution. In this study, samples of filtered PM<sub>2.5</sub> were collected simultaneously at three urban sites (Beijing, Tianjin, and Shijiazhuang) and at a regional background site (Xinglong) in the Beijing-Tianjin-Hebei (BTH) region from June 2014 to April 2015. The PM<sub>2.5</sub> at the four sites mainly comprised organic matter, secondary inorganic ions (sulfate, nitrate and ammonium) and mineral dust. Positive matrix factorization (PMF) demonstrated that, on an annual basis, secondary inorganic aerosol was the largest PM<sub>2.5</sub> source in this region, accounting for 29.2–40.5% of the PM<sub>2.5</sub> mass at the urban sites; the second largest PM<sub>2.5</sub> source was primary emission of motor vehicle exhaust in Beijing (24.9%), whereas coal combustion in Tianjin (15.2%) and Shijiazhuang (17.3%), particularly in winter. Secondary inorganic aerosol play a vital role in the haze process, with the exception of the spring haze of Shijiazhuang and Tianjin, where the dust source was crucial. In addition to secondary transformations, local direct emissions (coal combustion and motor vehicle exhaust) significantly contribute to the winter haze at the urban sites. Moreover, with the aggravation of haze pollution, the OC/EC mass ratio of PM<sub>2.5</sub> decreased considerably and the nitrate-rich secondary aerosol increased during all four seasons in Beijing, both of which indicate that local motor vehicle emissions significantly contribute to the severe haze episodes of Beijing. To assess the impacts of regional transport on haze pollution, the PMF results were further processed with backward trajectory clusters analysis, revealing that haze pollution usually occurred when air masses originating from polluted industrial regions in the south prevailed and is characterized by high PM<sub>2.5</sub> loadings with considerable contributions from secondary aerosol. This study suggests that the control strategies to mitigate haze pollution in the BTH region should be focused on the reduction of gaseous precursor emissions from fossil fuel combustion (motor vehicle emissions in Beijing and coal combustion in Tianjin, Hebei and nearby provinces).

## 1 Introduction

Due to rapid economic development, rapid urbanization processes and excessive energy consumption, regional haze pollution has been recognized as the most severe environmental problem in China and has received extensive attention from the government, public and scientists in recent years (Zhang et al., 2015a). Haze pollution mainly occurs in economically developed urban agglomerations; the most seriously polluted regions are typically the Beijing-Tianjin-Hebei (BTH) region, the Yangtze River Delta (YRD) region, the Pearl River Delta region (PRD) and the Sichuan Basin (Zhang et al., 2012; Zhang and Cao, 2015). The BTH region, which includes the two megacities of Beijing and Tianjin as well as Hebei Province, has the highest density of coal consumption and heavily polluting industries in China and is surrounded by Shandong, Henan, Shanxi and Inner Mongolia, which are all heavily populated, industrialized, urbanized and are frequently reported to have serious haze pollution due to their intensive emissions of air pollutants (Liang et al., 2016; Wang et al., 2014a). Therefore, because the BTH region features the strongest pollutant emissions (Zhao et al., 2012), unfavorable meteorological conditions (Cai et al., 2017; Xu et al., 2011), and a unique topography, extreme haze pollution, characterized by high fine particulate matter (PM<sub>2.5</sub>) loading and very low visibility, has frequently occurred in this region. From 2014-2015, of the 190 priority pollution monitoring cities in China, the annual average concentration of atmospheric PM<sub>2.5</sub> was highest in the BTH region (Zhang and Cao, 2015). Additionally, this region is characterized by frequent dust storms and corresponding high mineral dust loading episodes in spring (Huang et al., 2010; Sun et al., 2010).

Haze pollution with high fine PM loading could profoundly impact ecosystems, regional-scale atmospheric visibility, traffic safety, the economy, and interactions with climate (Zhang et al., 2015a); more importantly, this pollution can have adverse effects on human health, including the increased risks of respiratory, cardiac and other medical conditions (Elliot et al., 2016; Wu et al., 2017), thus leading to increased mortality rates, especially in megacities, which are generally seriously polluted and densely populated. In addition to the particle mass concentration and particle size, the health effects of PM are closely related to its chemical composition (Zhang et al., 2015a), and different diseases respond differently to different air pollutants (Tang et al., 2017). Moreover, the climate and environmental domino effects of PM are also closely related to the PM chemical compositions due to their different optical properties, such as those of black carbon, mineral particles, and brown carbon, which are light absorbing, while organic matter, ammonium sulfate and ammonium nitrate are light scattering (Tao et al., 2014a; Wang et al., 2015b; Wu et al., 2009; Zhang et al., 2016). These chemical constituents mainly originate from various anthropogenic sources, such as coal combustion, vehicle exhaust emissions, biomass burning, cooking, and industry-related emission, among others. Therefore, the key to reducing PM<sub>2.5</sub> concentrations and improving air quality is to control these sources, which necessitates a strong demand for increased knowledge about the detailed chemical natures and

sources of PM<sub>2.5</sub> in the BTH region.

Haze pollution has significant regional characteristics. In addition to local emissions, the regional or inter-regional transport of primary PM and gaseous precursors plays an important role during haze periods (Chen et al., 2017; Li et al., 2017, 2015; Tao et al., 2012; Wang et al., 2014a; 5 Ying et al., 2014). For example, the SO<sub>2</sub> measured in Beijing includes a large regional contribution transported from southern industrial areas (Guo et al., 2014). This contribution points to an urgent demand for wider collaborative works on emission control strategies between neighboring cities or provinces. For Shanghai, which is a megacity in the YRD region, Wu et al. (2017) estimated that the application of multiregional integrated control strategies in neighboring provinces could be 10 most effective in reducing PM<sub>2.5</sub> in Shanghai and could largely reduce the economic losses caused by haze pollution. Extensive studies have been performed to investigate the formation mechanisms and emission sources of haze pollution in the BTH region and have obtained many valuable results (Du et al., 2014; Liu et al., 2016a; Sun et al., 2013; Wang et al., 2014b; Zhang et al., 2014; Zhao et al., 2013d). Massive anthropogenic emissions from diverse local sources, such as regional 15 civil/industrial energy consumption, urban traffic, biomass burning and resuspended dust, and those transported from nearby provinces are widely regarded as the intrinsic reasons behind regional haze pollution events (Zhang et al., 2013; Zhao et al., 2012). Abnormal and unfavorable weather conditions also act as crucial factors in the formation of extensive and prolonged haze pollution events, such as the persistent haze event in January 2013 (Tao et al., 2014b; Wang et al., 20 2014b). In addition, many case studies, such as the winter regional haze events of 2010 (Zhao et al., 2013d) and 2013 (Sun et al., 2014; Wang et al., 2014b), have also revealed that severe haze events are largely driven by the high secondary production of sulfate, nitrate, ammonium and secondary organic aerosols (SOA), suggesting that aerosol chemistry plays a dominant role in haze evolution. Recent studies have reported a new efficient formation pathway for sulfate in the 25 Beijing winter haze via reactive nitrogen chemistry in aerosol water during haze events (Cheng et al., 2016; He et al., 2014; Wang et al., 2016a, 2013b). In terms of haze mitigation strategies, Guo et al. (2014) suggested that regulatory controls of gaseous emissions for volatile organic compounds and nitrogen oxides from local transportation and sulfur dioxide from regional industrial sources are the keys to reducing the urban PM level in Beijing. However, these studies 30 were often conducted at single sites (mostly in Beijing) and/or for short periods (specific haze events or a certain season); long-term multisite studies are scarce (Li et al., 2017; Shen et al., 2016; Zhang et al., 2013; Zhao et al., 2013c; Zong et al., 2016). In such studies, further questions are raised: first, due to the relatively few studies in Tianjin and Hebei, especially with respect to the source explorations of PM<sub>2.5</sub>, we cannot fully understand the overall characteristics of the haze 35 pollution in the BTH region; second, it is hard to directly compare the results between single-site studies to conduct a regional assessment as these studies covered different time periods and were conducted using different analytical approaches; third, the spatial and temporal variability of the

PM<sub>2.5</sub> sources in this region have not been extensively investigated, particularly with respect to the evolutions of emission sources at different pollution levels and their spatial variability. The above imperfections can limit the understanding of the sources and evolution processes of haze pollution on a regional scale and complicate effective mitigation strategies.

5           In this study, we conducted simultaneous measurements of PM<sub>2.5</sub> at three urban sites (Beijing, Tianjin, Shijiazhuang) in the BTH region and at one regional background site (Xinglong) as well as analyzing their chemical compositions and quantifying the apportionment of their sources using unified data processing and analytical methods. In addition, we emphatically analyzed the evolutions of the chemical compositions and emission sources at different pollution levels as well as their seasonal and spatial differences. To further explore the influences of regional transport on the haze pollution, the source apportionment results in combination with the backward trajectory clustering was used. This study can provide an overall understanding of the regional signal of PM<sub>2.5</sub> pollution in the BTH region and support stakeholders and policy makers in understanding the impacts of regional sources on the high PM<sub>2.5</sub> loadings, thus facilitating the design of effective joint emission abatement strategies.

## 2. Materials and methods

### 2.1 Sites and sampling

#### 2.1.1 Site description

Four sampling sites were selected in the Beijing-Tianjin-Hebei region (Fig. 1), including three urban sites (Beijing, Tianjin and Shijiazhuang) and a regional background site (Xinglong). Beijing is the capital of China; Tianjin is an economically developed municipality; and Shijiazhuang is the capital of Hebei province, with an annual PM<sub>2.5</sub> concentration in 2013 ranking second in Hebei province and the whole of China (<http://www.greenpeace.org.cn/PM25-ranking/>). These three cities have their own atmospheric characteristics due to their different energy and industrial structures, and thus, could represent the pollution characteristics of different types of urban areas in the BTH region. The Beijing site (39.97 °N, 116.38 °E) was situated in the courtyard of the Institute of Atmospheric Physics (IAP) of the Chinese Academy of Sciences (CAS). The Tianjin site (39.09 °E, 117.19 °N) was located in the Tianjin Atmospheric Boundary Layer Observatory of the Chinese Meteorological Administration, and the Shijiazhuang site (38.03 °N, 114.53 °E) was located at the Hebei Meteorological Service. The sampling sites in Beijing, Tianjin and Shijiazhuang were affected by non-specific pollution sources while being influenced by mixed emission sources, such as local motor vehicle emissions, coal combustion, road dust, industrial activities, cooking, and transported pollutants, etc. Therefore, these sites are considered to be representative of typical urban environments. The sampling site in Xinglong (117.58 °E, 40.39 °N) was located at Xinglong Observatory, National Astronomical Observatory, Chinese Academy of Sciences. Xinglong Observatory is located in the northeastern region of

Beijing, which is located at a liner distance of approximately 110 km from Beijing and is surrounded by mountains and thus allowing it to be minimally affected by human activities. Therefore, it is one of the regional atmospheric background stations of the Chinese Academy of Sciences.

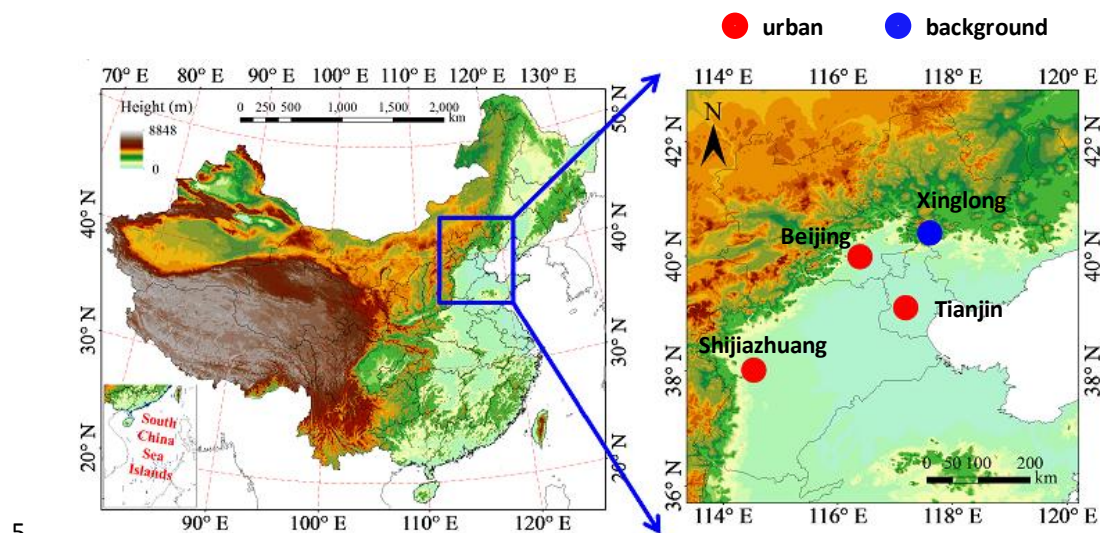

Figure 1. Map of the sampling sites (Beijing, Tianjin and Shijiazhuang are representatives of urban stations, whereas Xinglong represents the regional background)

### 2.1.2 PM<sub>2.5</sub> sampling

The PM<sub>2.5</sub> samples were simultaneously collected at the four sites using a PM<sub>2.5</sub> sampler (TH-150C, Tianhong, Wuhan) from June 2014 to April 2015. During each season, we collected PM<sub>2.5</sub> samples on quartz membrane filters every day and night for one month, except on rainy days. The specific sampling period for the summer extended from 15 June 2014 to 14 July 2014, that of the autumn extended from 15 September 2014 to 14 October 2014, that of the winter extended from 29 December 2014 to 27 January 2015, and that of the spring extended from 20 March 2015 to 18 April 2015. The sampling time of each sample was 11.5 h, which generally occurred from 8:00 am to 19:30 pm during the daytime and from 20:00 pm to 7:30 am of the next day during the nighttime. Over the entire observational period, 224, 214, 221 and 211 samples were collected in Beijing, Tianjin, Shijiazhuang and Xinglong, respectively, and numbers of samples in each season are shown in Table S1.

Detailed records of the instrumental conditions were collected during the sampling, including the sampling time, the sampled-air volume, atmospheric pressure, air temperature, etc. After sampling, the quartz filters were individually placed in petri dishes and were immediately stored at -20 °C prior to weighing and subsequent analysis. To ensure that the instrument worked at the specified flow rate, the airflow rate of the sampler was calibrated before and after each sampling. The carbon brush was replaced every month, and the outlet of the tail pipe was kept far away from the sampler in order to avoid contaminating the filter samples. During the sampling process, strict quality control was conducted to avoid any contamination. The frequent cleaning of the cutter and

tray of the membrane was basic and necessary.

## 2.2 Filter analysis

### 2.2.1 Gravimetry

The quartz **membrane** filters, which were packaged with aluminum foil, were pre-fired in a muffle furnace at 500 °C for 4 h to remove organic material. In addition, in order to minimize the influence of water adsorption, the filters were weighed before and after sampling using a microelectronic balance with a reading precision of 10 µg after undergoing a 48 h equilibration period inside a chamber under **the** conditions of constant temperature (20±1 °C) and humidity (45±5%). **The atmospheric** PM<sub>2.5</sub> masses were deduced from the gravimetric measurements performed before and after sampling. To guarantee the accuracy of the **weights, the** weighing was repeated until a difference **of less than 0.10 mg** between **the** two measured weights was achieved. All **the** procedures were strictly quality-controlled to avoid any possible contaminations of the samples.

### 2.2.2 Chemical analysis

A quarter of each sample was ultrasonically extracted using 50 mL **of** deionized water (with a specific resistivity of 18.2 MΩ/cm) for 30 min. After passing through microporous membranes with pore sizes **of** 0.22 µm, the extracted solutions were analyzed using an ion chromatograph (IC) system (Dionex ICS-90, USA) for the detection of SO<sub>4</sub><sup>2-</sup>, NO<sub>3</sub><sup>-</sup>, NH<sub>4</sub><sup>+</sup>, Cl<sup>-</sup>, K<sup>+</sup>, Na<sup>+</sup>, Ca<sup>2+</sup> and Mg<sup>2+</sup>. More details are given **in** Huang et al. (2016).

A 0.495 cm<sup>2</sup> punch split from another quarter of each sample was used for the analysis of organic carbon (OC) and elemental carbon (EC), which was performed using a thermal/optical carbon aerosol analyzer (DRI Model 2001A, Desert Research Institute, USA) following the protocol of IMPROVE\_A (TOR). **In a pure helium atmosphere, OC1, OC2, OC3 and OC4 are produced stepwise at 140 °C, 280 °C, 480 °C and 580 °C, respectively; followed by EC1 (540 °C), EC2 (780 °C) and EC3 (840 °C) in a 2% oxygen-contained helium atmosphere. The OPC (organic pyrolyzed carbon) is determined when the reflected laser signal returns to its initial value after oxygen is added to the analyzed atmosphere. Therefore, the OC is operationally defined as OC=OC1+OC2+OC3+OC4+OPC, while the EC is defined as EC=EC1+EC2+EC3-OPC. Detailed procedures can be found in Xin et al. (2015).**

The microwave acid digestion method was used to digest **the** filter samples into liquid solution for elemental analysis. One quarter of each filter sample was placed in the digestion vessel with a mixture of 6 mL HNO<sub>3</sub>, 2 mL H<sub>2</sub>O<sub>2</sub> and 0.6 mL HF, and was **then** exposed to a three-stage microwave digestion procedure **from** a microwave-accelerated reaction system (MARS, CEM Corporation, USA). After that, the digestion solution was transferred to PET bottles and diluted to 50 mL with deionized water (with a conductivity of 18.2 MΩ/cm). Agilent 7500a inductively coupled plasma mass spectrometry (ICP-MS, Agilent Technologies, Tokyo, Japan) was used to

determine the concentrations of 18 trace elements (TEs) in the digestion solution, including Mg, Al, K, Ca, V, Cr, Mn, Fe, Co, Ni, Cu, Zn, As, Se, Ag, Cd, Tl and Pb. More detailed information, such as instrument optimization, calibration and quality control, is given in Wang et al. (2016b).

## 2.3 Data analysis method

### 5 2.3.1 Chemical mass closure

The chemically reconstructed PM<sub>2.5</sub> mass (PM<sub>chem</sub>) was calculated as comprising eight categories of chemical species, which can be expressed as follows:

$$[\text{PM}_{\text{chem}}] = [\text{Organic matter}] + [\text{EC}] + [\text{Mineral dust}] + [\text{Trace metals}] + [\text{Sulfate}] + [\text{Nitrate}] + [\text{Ammonium}] + [\text{Chloride}]. \quad (1)$$

10 In estimating organic matter (OM), an OC to OM conversion factor of 1.6 was adopted for the aerosols at urban sites (Cao et al., 2007; Turpin and Lim, 2001) and regional background site. Although the literature suggests that a higher OC to OM conversion factor of 2.1 is suitable for rural sites (Bressi et al., 2013; Turpin and Lim, 2001), we still used a uniform value of 1.6 for the sake of spatial comparisons. Therefore,

$$15 \quad [\text{OM}] = 1.6 \times [\text{OC}]. \quad (2)$$

The calculation of mineral dust was performed on the basis of crustal element oxides (such as Al<sub>2</sub>O<sub>3</sub>, SiO<sub>2</sub>, CaO, Fe<sub>2</sub>O<sub>3</sub>, TiO<sub>2</sub>, MnO<sub>2</sub> and K<sub>2</sub>O) (Christoforou et al., 2000). The Ti content was very low in atmospheric particulate matter, with 0.04 µg/m<sup>3</sup> measured in the PM<sub>2.5</sub> in Beijing, Tianjin and Shijiazhuang (Zhao et al., 2013b). Thus, eliminating the Ti content has an almost negligible influence on the estimation of the mineral dust. Mineral dust was calculated as follows:

$$20 \quad [\text{Mineral dust}] = [\text{Al}_2\text{O}_3] + [\text{SiO}_2] + [\text{CaO}] + [\text{MnO}_2] + [\text{Fe}_2\text{O}_3] + [\text{K}_2\text{O}] = 2.14 \times [\text{Si}] + 1.89 \times [\text{Al}] + 1.4 \times [\text{Ca}] + 1.58 \times [\text{Mn}] + 1.43 \times [\text{Fe}] + 1.21 \times [\text{K}] \quad (3)$$

In this study, the measurements of the trace elements in the particles did not include the determination of Si, so the Si content was calculated based on its ratio to Al in crustal materials, namely, [Si] = 3.41 × [Al] (Mason, 1966). The calculations of K<sub>2</sub>O and Fe<sub>2</sub>O<sub>3</sub> were also based on their ratios to Al in crustal materials (Wedepohl, 1995) since they have abundant artificial sources in addition to natural sources.

The trace metal content reflects the sum of 11 different heavy metal species and is expressed as:

$$30 \quad [\text{Trace metals}] = \text{V} + \text{Co} + \text{Ni} + \text{Cu} + \text{Pb} + \text{Zn} + \text{As} + \text{Se} + \text{Ag} + \text{Cd} + \text{Tl} \quad (4)$$

The above chemical reconstruction method was applied to the four sites, and comparisons of the reconstructed results (PM<sub>chem</sub>) with the gravimetric results (PM<sub>grav</sub>) are shown in Figure S1. It can be clearly seen that PM<sub>chem</sub> is significantly related to PM<sub>grav</sub>, indicating that the chemical reconstruction method exhibited strong reliability. However, the PM<sub>chem</sub> concentrations at the four sites were all less than those of PM<sub>grav</sub>; therefore, there exists unresolved matter that may largely be retaining water in the sampling membrane and particulate matter. Moreover, during the period



between weighing and chemical measurements, the volatilization of organic matter and the decomposition of ammonium nitrate may occur. The discrepancy between  $PM_{chem}$  and  $PM_{grav}$  was thus defined as unknown.

### 2.3.2 Source apportionment

5 The EPA Positive Matrix Factorization (PMF) 5.0 model was applied to apportion the sources of  $PM_{2.5}$  in this study, as it is an effective source apportionment receptor model that has been successfully applied for source apportionments in many cities and regions worldwide (Huang et al., 2014; Reff et al., 2007). Unlike to the CMB model (Chemical Mass Balance), the PMF model does not require source profiles prior to analysis, but only requires the values of the concentrations  
10 of the sample species and their uncertainties (U.S. Environmental Protection Agency, 2014; Zhang et al., 2015c). In this study, the model simulations were applied to datasets comprising 34 species: eight carbon fractions (OC1, OC2, OC3, OC4, OPC, EC1, EC2 and EC3), 8 inorganic species ( $SO_4^{2-}$ ,  $NO_3^-$ ,  $NH_4^+$ ,  $K^+$ ,  $Na^+$ ,  $Ca^{2+}$ ,  $Mg^{2+}$  and  $Cl^-$ ), and 18 inorganic elements (Mg, Al, K, Ca, V, Cr, Mn, Fe, Co, Ni, Cu, Zn, As, Se, Ag, Cd, Tl and Pb). Due to the low OC and EC concentrations  
15 at the background site, the entire concentrations of OC and EC were input into the PMF model instead of the eight carbon fractions. In addition to the concentrations of the sample chemical species, the uncertainties of the sample species were calculated based on two different situations according to the PMF 5.0 user guide (U.S. Environmental Protection Agency, 2014):

If the concentration is less than or equal to the provided method detection limit (MDL), the  
20 uncertainty is calculated using a fixed fraction of the MDL, which is written as  $Uncertainty = \frac{5}{6}MDL$ . If the concentration is greater than the provided MDL, the calculation is defined as  $Uncertainty = \sqrt{(Error\ Fraction + Concentration)^2 + (0.05MDL)^2}$ . In this study, the error fractions of  $SO_4^{2-}$ ,  $NO_3^-$  and  $NH_4^+$  were estimated to be 5%, those of OPC, EC2 and EC3 were 15%, and those of other species were 10%. PMF analysis requires a complete data set, in order to  
25 reduce the error, the samples with missing values of individual species were excluded, rather than replaced by the geometric mean of the remaining observations.

The number of factors must be chosen prior to using PMF. In this study, the PMF solutions using 5–12 factors at three urban sites and 3–9 factors at the regional background site were explored with a final factor number chosen based on interpretability as well stability across  
30 bootstrap-replicate data sets (Xie et al., 2013a, 2013b).

### 2.4 Meteorological data and backward trajectory modeling

Meteorological data, including the ambient temperature, relative humidity and wind speed in Beijing and Xinglong were measured within 50 m of the filter sampling sites, using an automatic meteorological observation instrument (Milos520, Vaisala, Finland) located at an 8 m  
35 measurement height. In addition, in Tianjin and Shijiazhuang, the meteorological data was

obtained from the meteorological monitoring stations of the China Meteorological Administration, which was located within 100 m of the sampling sites.

The backward trajectory analysis method is widely applied to identify the potential source regions and transport pathways of air masses, especially for serious air pollution episodes (Gao et al., 2015; Hu et al., 2012; Zhang et al., 2014). In this study, 48 h backward trajectories terminated at a height of 100 m above ground level were calculated for the all four sampling sites using the Hybrid Single-Particle Lagrangian Integrated Trajectory (HYSPLIT 4.9) model developed by the U.S. National Oceanic and Atmospheric Administration/Air Resources Laboratory (NOAA/ARL). The trajectories were calculated every 12 h, with starting times at 8:00 and 20:00 local time (corresponding to each sampling) during the entire observational period.

### 3. Results and discussion

#### 3.1 General characteristics of PM<sub>2.5</sub>

##### 3.1.1 Annual mass concentrations

The temporal variability of the gravimetrically determined PM<sub>2.5</sub> concentrations at the four sites (Beijing, Tianjin, Shijiazhuang and Xinglong) throughout the entire observation period is shown in Fig. 2. The strong day-to-day variability of the PM<sub>2.5</sub> concentrations can be easily observed, especially in winter, when PM<sub>2.5</sub> ranges from 34.1 to 612.6 µg/m<sup>3</sup> in Shijiazhuang. These concentrations typically record periodic ‘clean-polluted-clean’ cycles for a few days, which were also reported by Guo et al. (2014), who noted that the Beijing haze pollution underwent clear periodic cycles of 4–7 days in length. These periodic cycles of haze episodes are primarily driven by atmospheric processes and fluctuations in meteorological conditions (Guo et al., 2014; Zhang et al., 2015a), such as wind speed, relative humidity, air temperature/pressure, atmospheric stability, the height of the planetary boundary layer and air mass origins. Very similar patterns of PM<sub>2.5</sub> temporal variations were found at all four sites (Fig. 2), suggesting homogeneous characteristics of atmospheric particulate matter on a regional scale.

On average, the PM<sub>2.5</sub> annual PM<sub>2.5</sub> concentrations throughout the entire observation period recorded higher levels at the urban sites, which were 99.5±67.4, 105.7±63.1, 155.2±100.8 µg/m<sup>3</sup> in Beijing, Tianjin and Shijiazhuang, respectively, representing values that were 1.5, 1.6 and 2.4 times those at the background site (Xinglong), respectively. During the entire observational period, 81% of the samples in Shijiazhuang exceeded the second grade of the PM<sub>2.5</sub> daily average mass concentrations in China (75 µg/m<sup>3</sup>), followed by Tianjin (63%) and Beijing (55%) (Table S1), with the minimum occurring in Xinglong (29%). Particularly serious pollution was observed in Shijiazhuang, which consumes huge amounts of energy for industrial processes and daily life (Zhao et al., 2013c) and exhibits higher relative humidity and lower wind speeds than the other sites (Table S2), which are both beneficial for the accumulation of PM<sub>2.5</sub> mass (Liu et al., 2017b). Moreover, the largest differences in the PM<sub>2.5</sub> average mass concentrations between the urban sites

and the background site occurred in winter, yielding values of 2.2–4.1 times those in Xinglong. This spatial difference can be explained by the strong intensity of pollution emissions (coal combustion for heating) in winter at the urban sites.

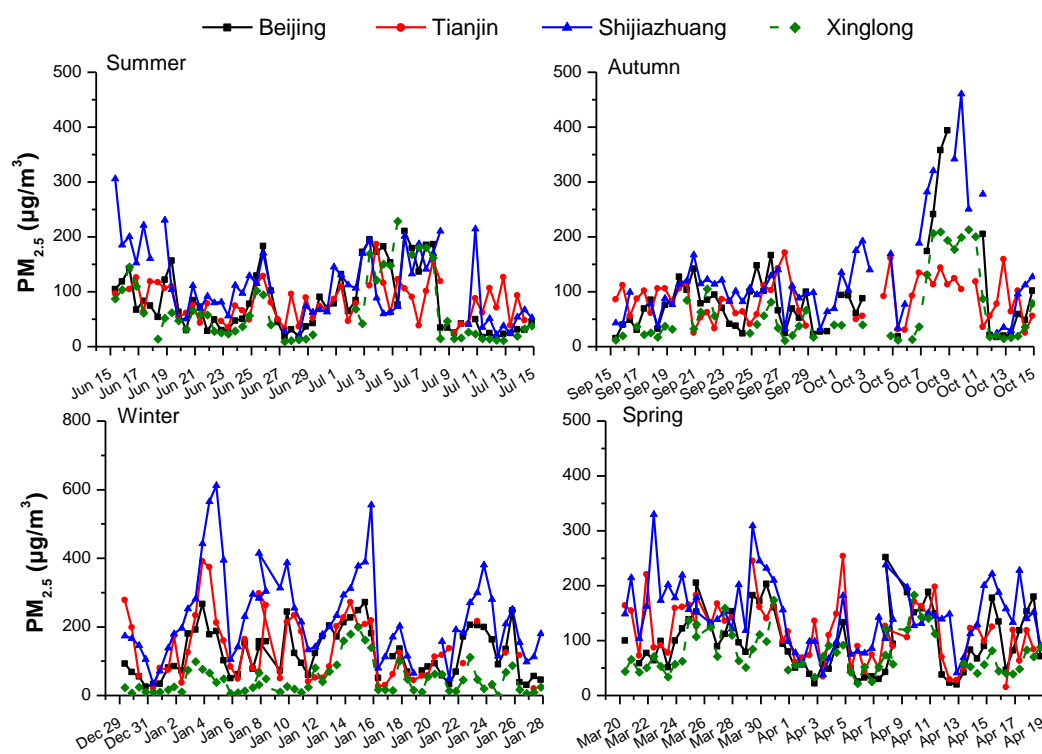

5 Figure 2. Time-series of the gravimetric  $PM_{2.5}$  concentrations during the four study periods

### 3.1.2 Seasonal variation

Due to the minor effects of anthropogenic emissions, the seasonal variations of  $PM_{2.5}$  concentrations in Xinglong were not significant ( $56.7\text{--}77.9 \mu\text{g}/\text{m}^3$ ), and only slightly higher values were observed in spring. Zhao et al. (2009) also determined that the maximum  $PM_{2.5}$  concentrations usually occur in spring in Shangdianzi, which is another regional background area in the North China Plain. However, at the urban sites, significant seasonal variations were observed, especially in Shijiazhuang. The highest  $PM_{2.5}$  values were recorded in winter, with average concentrations of  $124.8 \pm 69.9$ ,  $136.6 \pm 93.8$  and  $231.8 \pm 129.1 \mu\text{g}/\text{m}^3$  in Beijing, Tianjin and Shijiazhuang, respectively. There were four extreme haze episodes that occurred in Shijiazhuang, particularly serious were the episodes from January 2 to 6 and from January 11 to 16. Numerous studies have also revealed that the heaviest haze pollution events with extremely high  $PM_{2.5}$  loadings occurred in winter in the BTH region (Wang et al., 2012a; Zhang and Cao, 2015; Zhao et al., 2013d), which has mainly been attributed to the combination of intensive coal-fired heating and unfavorable meteorological conditions (i.e., more frequent occurrences of stagnant weather, temperature inversions and low boundary layer heights) in this region (Tang et al., 2016a; Zhang and Cao, 2015; Zhao et al., 2009). Following winter, the average  $PM_{2.5}$  concentrations in spring

also remained at a relative high level at the urban sites (101.0–148.4  $\mu\text{g}/\text{m}^3$ ), which may have partly resulted from the enhanced mineral dust (see Fig. 5) produced by the relatively high wind speeds during this season (Table S2). Due to strong turbulence that occurs under conditions of strong radiation intensity and high temperature in summer, as well as the high atmospheric mixing layer generally observed in this season (Tang et al., 2016a), air pollutants could have been effectively diluted and diffused, thus resulting in the lowest  $\text{PM}_{2.5}$  concentrations being measured during this season. The  $\text{PM}_{2.5}$  concentrations in autumn were close to those in summer, but one extreme haze episode was recorded from October 5 to 11 in Beijing and Shijiazhuang, with the highest concentration of the daily  $\text{PM}_{2.5}$  reaching 394  $\mu\text{g}/\text{m}^3$  in Beijing and 460  $\mu\text{g}/\text{m}^3$  in Shijiazhuang. The extreme haze episode in October 2014 was recorded and analyzed in depth by Yang et al. (2015).

## 3.2 Chemical compositions of $\text{PM}_{2.5}$

### 3.2.1 Annual compositions

The chemical compositions of the entire sample set collected from the three urban sites and the regional background site were similar, further confirming the regional homogeneity of atmospheric  $\text{PM}_{2.5}$ . The  $\text{PM}_{2.5}$  in this region (Fig. 3) primarily comprised organic matter ( $\text{OM}=\text{OC}\times 1.6$ , 16.0–25.0%), secondary inorganic ions (SNA, including sulfate, nitrate and ammonium, 43.6–53.1%), mineral dust (14.7–20.8%), and lower proportions of EC (2.8–6.2%), chloride (1.9–5.5%) and trace metals (0.4–0.6%). The annual average concentrations of carbonaceous aerosols (OM plus EC) were 31.1, 27.0 and 44.2  $\mu\text{g}/\text{m}^3$  in Beijing, Tianjin and Shijiazhuang, respectively, thus constituting large fractions (25.5–31.2%) of  $\text{PM}_{2.5}$  in the urban atmosphere. It is worth noting that EC accounted for 6.2%, 5.9% and 5.7% of the measured masses of  $\text{PM}_{2.5}$  in Beijing, Tianjin and Shijiazhuang, respectively, which were higher than that measured in Xinglong (2.8%), reflecting the strong emissions from fossil fuel combustion in urban areas. In Xinglong, lower concentrations and lower fractions of organic matter but higher fractions of mineral dust and SNA than those of the urban sites were discovered. The presence of lower contributions of organic matter but higher contributions of SNA at the background site is consistent with the results measured on Qimu Island (another regional background site in northern China, which is located approximately 300 km southeast of the BTH region) (Zong et al., 2016). This was mainly attributed to the regional-scale emission characteristics of gaseous precursors in this region, in which there are more abundant  $\text{SO}_2$ ,  $\text{NO}_x$ ,  $\text{NH}_3$  emissions than OC emissions (Zhao et al., 2012), and the general characteristics of the regional atmosphere are well reflected at the regional background site.

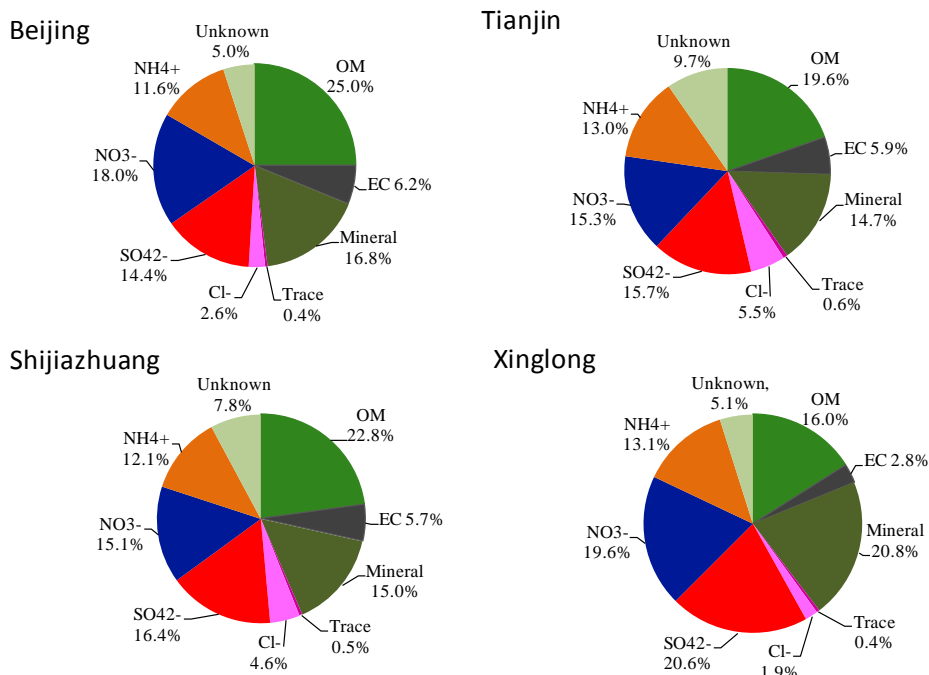

Figure 3. Pie charts depicting the percentages of the major chemical components in gravimetric PM<sub>2.5</sub> based on annual data

As the key PM<sub>2.5</sub> constituents, sulfate, nitrate and ammonium (SNA), are generally recognized to originate from the secondary conversions of gaseous SO<sub>2</sub>, NO<sub>x</sub> and NH<sub>3</sub> via gas-phase chemical reactions and heterogeneous reactions (Wang et al., 2016a; Zhang et al., 2015a). In this study, they accounted for 14.4–20.6%, 15.1–19.6% and 11.6–13.1% of the annual average PM<sub>2.5</sub> concentrations, respectively. Among the three urban sites, the highest NO<sub>3</sub><sup>-</sup> contribution (18.0%) was found in Beijing, which agrees well with it having a strong traffic source. In addition, from the annual results, the mass ratio of NO<sub>3</sub><sup>-</sup>/SO<sub>4</sub><sup>2-</sup> in Beijing was 1.25, which was higher than that in Tianjin (0.97) and Shijiazhuang (0.92) as well as that in Xinglong (0.95). The NO<sub>3</sub><sup>-</sup>/SO<sub>4</sub><sup>2-</sup> mass ratio has often been used as an indicator of the relative contributions of sulfur and nitrogen from mobile versus stationary sources to aerosol particles in the atmosphere (Arimoto et al., 1996; Cao et al., 2009; Han et al., 2016), as vehicle exhausts and coal-combustion emissions are significant contributors of nitrate and sulfate, respectively (Huang et al., 2014). Therefore, the higher NO<sub>3</sub><sup>-</sup>/SO<sub>4</sub><sup>2-</sup> mass ratio of Beijing implies that the predominance of motor vehicle emissions in the contributions to PM pollution (Han et al., 2016; Yang et al., 2015), while in Tianjin and Shijiazhuang, coal combustion may still play a dominant role. However, compared to the reported results, the NO<sub>3</sub><sup>-</sup>/SO<sub>4</sub><sup>2-</sup> mass ratios of the two cities also increased from 0.85 (2009-2010) (Zhao et al., 2013b) to 0.92 (this study) in Shijiazhuang, as well as from 0.69 (2008) (Gu et al., 2011) to 0.75 (2009-2010) (Zhao et al., 2013b) and to 0.97 (this study) in Tianjin. This increasing trend also occurred in the background area, as the NO<sub>3</sub><sup>-</sup>/SO<sub>4</sub><sup>2-</sup> mass ratio in Xinglong increased from 0.78 (2009-2010) (Li, et al., 2013) to 0.95 (this study). These results clearly

revealed that atmospheric nitrate pollution is worsening in this region, which is generally recognized as being caused by increasing motor vehicle emissions and indicates the remarkable effect of the control measures of SO<sub>2</sub> emissions.

In addition to carbonaceous and SNA aerosols, mineral dust was also a major component of PM<sub>2.5</sub>, constituting a smaller fraction of the PM<sub>2.5</sub> concentrations (14.7–16.8%) at the urban sites than at the background site (20.8%). Cl<sup>-</sup> exhibited higher concentrations and fractions in Shijiazhuang (7.2 µg/m<sup>3</sup>, 4.6%) and Tianjin (5.8 µg/m<sup>3</sup>, 5.5%) than it did in Beijing (2.6 µg/m<sup>3</sup>, 2.6%) and Xinglong (1.2 µg/m<sup>3</sup>, 1.9%), further illustrating the important contribution of coal combustion emissions to the PM<sub>2.5</sub> concentrations in Shijiazhuang and Tianjin. Trace element concentrations varied from 0.3 to 0.7 µg/m<sup>3</sup> and constituted only a minor fraction of the masses.

### 3.2.2 Seasonal variations

The PM mass and its chemical compositions are governed by chemical processes, evolutions of emission sources and meteorological conditions (Bressi et al., 2013; Liu et al., 2017b), which usually exhibit seasonality. The seasonal patterns of PM<sub>2.5</sub> at the urban sites were mainly driven by OM, SNA and mineral dust, which were the major components of PM<sub>2.5</sub> during each season. In winter, the dominant component at the urban sites was OM; moreover, Figure 4 shows that the OM concentration and its contribution to PM<sub>2.5</sub> mass were significantly higher in winter (38.1–82.7 µg/m<sup>3</sup>, 27.9–35.7%) than those in other seasons. In addition, the EC concentration also reached a maximum value in winter at the urban sites, yielding values of 11.8, 10.7 and 16.3 µg/m<sup>3</sup> in Beijing, Tianjin, and Shijiazhuang, respectively. Similar seasonal variations of carbonaceous aerosols were also observed in the BTH region (Beijing, Tianjin, Shijiazhuang, Chengde and Shangdianzi) (Zhao et al., 2013), Jinan (Yang et al., 2012) and the Pearl River Delta region (Cao et al., 2004). There are two possible explanations for this phenomenon. On the one hand, a substantial increase in the amount of coal-fires used for residential heating in winter could increase the abundance of carbon-containing emissions, including primary organic carbon, EC, and VOCs (Zhao et al., 2012). On the other hand, the lower temperatures in winter could favor the conversion from gaseous VOCs to their particulate forms (Wang et al., 2015), whereas the high temperatures in warm seasons, especially those in summer (during which the lowest OM concentrations can be seen in Fig. 4), may cause the semi-volatile organic compounds to mainly exist in their gaseous forms in the atmosphere. Cl<sup>-</sup>, which is a good tracer of coal combustion, also exhibited higher concentrations and contributions to the PM<sub>2.5</sub> mass in winter (5.3–14.6 µg/m<sup>3</sup>, 4.6–6.3%) than it did in other seasons (1.0–5.6 µg/m<sup>3</sup>, 1.2–4.9%) at the urban sites. However, since it is less affected by local anthropogenic sources, the Xinglong site recorded the lowest concentrations and contributions of EC and Cl<sup>-</sup>, which showed no distinct seasonal variations.

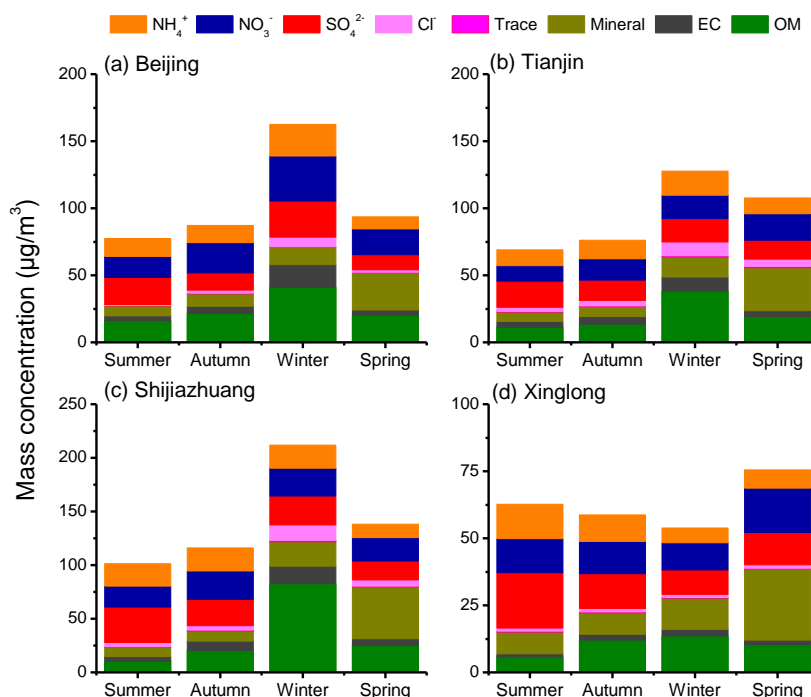

Figure 4. Seasonal variations of the major chemical components of PM<sub>2.5</sub> at the four sites

Unlike OM, SNA has its highest contributions in summer at the urban sites (51.7–66.2%), which were significantly higher than those in winter and spring. The prominence of SNA in summer was more apparent in Xinglong (71.2%), which reflects the dominant contributions of meteorological factors. At the urban sites, SNA also presented prominent contributions to the PM<sub>2.5</sub> in autumn (51.9–58.1%), and the average PM<sub>2.5</sub> concentrations were comparable in summer and autumn, which may have resulted from the high relative humidity in autumn, which is even higher than that in summer (Table S2). However, the contributions of sulfate and nitrate exhibited obvious seasonal differences at these three urban sites and even more apparent differences at the background site, recording greater contributions of sulfate in summer (23.6–29.9%) and nitrate in autumn (18.4–25.7%). This pattern was also found in our previous study in Beijing (Huang et al., 2016). This trend is closely related to their respective chemical/physical properties and mechanisms of generation, as nitrate tends to be decomposed under high temperatures (which mainly occurs in summer) due to the thermodynamic instability of ammonium nitrate, while the process of the chemical generation of ammonium sulfate (i.e., the gas-phase oxidation of SO<sub>2</sub> and its subsequent heterogeneous reactions) is largely promoted under the high temperatures and intense solar radiation of summer (Huang et al., 2016; Ianniello et al., 2011; Zhang et al., 2015a).

In spring, the primary chemical component at all four sites was mineral dust, which contributed 27.5–34.1% to PM<sub>2.5</sub> and was significantly higher than it was in other seasons (7.5–20.7%), thus reflecting the important influence of northwest dust transport on the atmospheric fine particles of the BTH region in that spring and the increase of local resuspended dust (such as road dust and construction dust) resulting from the enhanced wind speeds during this

season (Table S2).

### 3.3 Source apportionment using PMF

The sources/factors of PM<sub>2.5</sub> were apportioned by applying the PMF receptor model at three urban sites and at the background site for comparison. The identification of the sources was based on certain chemical tracers that are generally presumed to be emitted by specific sources and are present in significant amounts in the collected samples (Singh et al., 2016). Based on this, eight factors were identified for Beijing and Tianjin, nine were identified for Shijiazhuang, and only five were identified for Xinglong. The relative dominances of each source varied by site and season. Contributions of the identified sources determined by analyzing the annual data are shown in Fig. 6; the factor profiles of PM<sub>2.5</sub> for the regional background site (Xinglong) are listed in Fig. 5, while those for the urban sites are shown in Supplementary Fig. S2-4. These factors can be summarized as follows:

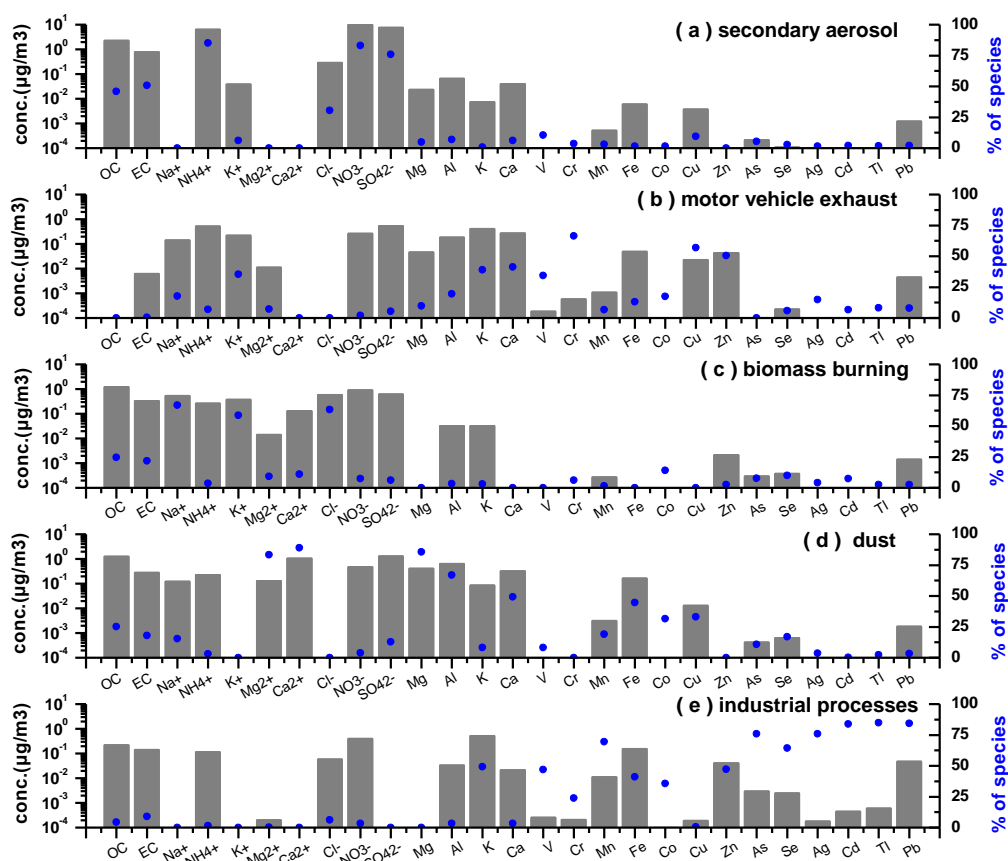

Figure 5. PMF factor/source profiles for the PM<sub>2.5</sub> samples throughout the entire study period in Xinglong in terms of concentrations ( $\mu\text{g}/\text{m}^3$ ) and percentages (%)

15



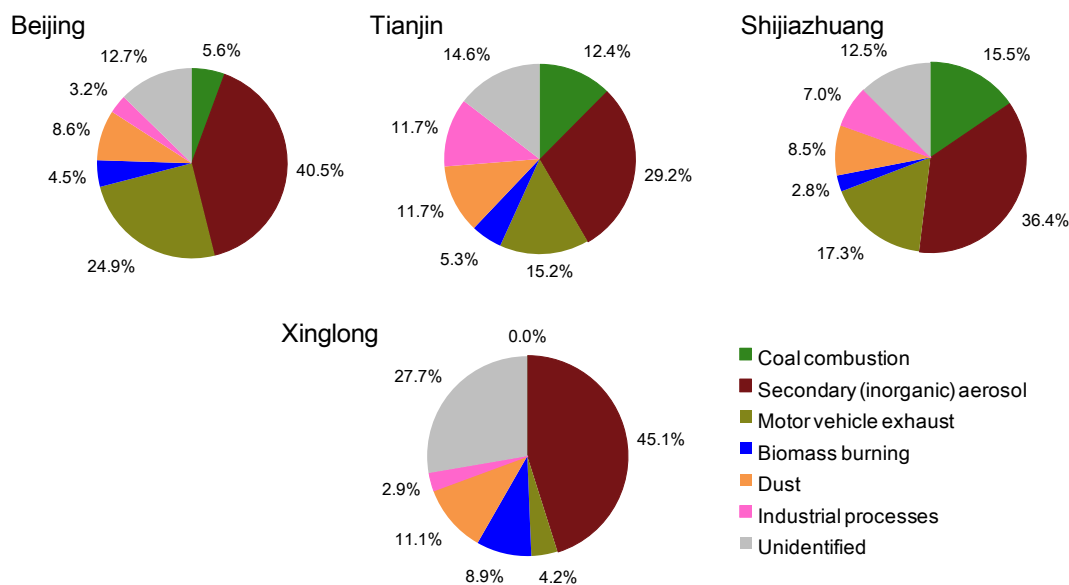

Figure 6. The annual contributions of the identified sources to PM<sub>2.5</sub> masses at the four sites

(i) Coal combustion. In China, coal combustion is generally used in thermal power plants, for industrial fuel use, as well as for winter residential heating in its northern cold regions. This source is characterized by high loadings of OC, EC, and chloride, most of which were apportioned in this factor (Fig. S2-4a). At the three urban sites, coal combustion source exhibited significantly higher concentrations (17.6, 31.6 and 67.8  $\mu\text{g}/\text{m}^3$  in Beijing, Tianjin and Shijiazhuang, respectively) and contributions to the PM<sub>2.5</sub> (14.1%, 23.3% and 29.2%, respectively) in winter than were seen in other seasons (which recorded concentrations of 0.6–16.1  $\mu\text{g}/\text{m}^3$  and contributions of 0.7–10.7%). This was strongly aligned with the seasonal characteristics of coal combustion activities in this region. The annual average emissions from coal combustion contributed 5.6% to the PM<sub>2.5</sub> in Beijing and were even higher in Tianjin (12.4%) and Shijiazhuang (15.6%) but were not identified at Xinglong.

(ii) Secondary aerosol/inorganic aerosol. The dominant source was secondary inorganic aerosol at the three urban sites (29.2–40.5%) and secondary aerosol in Xinglong (45.1%). In Xinglong, this factor (Fig. 5a) can be identified as secondary aerosol because of the high contributions and accumulations of OC, sulfate, nitrate and ammonium, which caused the aerosol to include secondary inorganic aerosol (SIA) and secondary organic aerosol (SOA). In addition, approximately 30% of the total chloride was assigned to this source, indicating that coal combustion source was included in the secondary aerosol source. However, our analysis indicates that there were only very minor local coal combustion emissions in Xinglong. Therefore, this contribution can probably be attributed to the regional transport of coal combustion emissions, along with secondary source.

In Tianjin, high contributions of ammonium, nitrate and sulfate, which comprise most of the aerosol mass concentrations, were apportioned in the secondary aerosol (Fig. S3b) with only

minor OC masses; thus, we identified this factor as secondary inorganic aerosol. In contrast, in Beijing and Shijiazhuang, secondary inorganic aerosol were further separated into two sources, which are defined as nitrate-rich secondary (Fig. S2b and S4b) and sulfate-rich secondary aerosol (Fig. S2c and S4c), which record the respective characteristics of the prominent contributions of ammonium/nitrate and ammonium/sulfate. Consistent with the generating mechanisms and seasonal characteristics of nitrate and sulfate, the contribution of nitrate-rich secondary aerosol to PM<sub>2.5</sub> had the highest values in autumn, whereas the sulfate-rich secondary aerosol had the highest contribution values in summer in Beijing and Shijiazhuang.

(iii) Motor vehicle exhaust. Emissions from motor vehicles are major factors in serious air pollution, especially in economically developed megacities. In our study, the factor of motor vehicle exhaust, which has high concentrations of OC, EC, and the trace metals of Cu, Zn and Pb, which are considered to be characteristic species of brake wear dust and tire wear dust (Gao et al., 2014; Karnae and John, 2011; Tian et al., 2016; Zhang et al., 2013), was identified at all four study sites, contributing 24.9% (Beijing), 15.2% (Tianjin) and 17.3% (Shijiazhuang) of the aerosols at the urban sites and only 4.2% of those in Xinglong. This suggests the important role of motor vehicle exhaust in the urban PM<sub>2.5</sub> pollutions, especially in Beijing, where the number of motor vehicles increased to 5.7 million by 2016 (<http://www.chinaidr.com/tradenews/2017-03/111537.html>). Notably, secondary aerosols are mainly produced by the gas-to-particle transformations of SO<sub>2</sub>, NO<sub>x</sub>, NH<sub>3</sub>, and VOCs, and motor vehicle exhaust is an important source of the emissions of NO<sub>x</sub> and VOCs in urban areas (Huang et al., 2011; Tang et al., 2016b). Therefore, the actual contribution of motor vehicle exhaust to aerosols should be higher when considering the secondary formations of gaseous exhaust in the atmosphere.

Since 2017, the vehicular emission standard of China in Phase V (equivalent to European V) has been implemented on a national scale, and has caught up with developed countries. However, the less restrictive standards for oil quality in China than those in Europe and United States are the main reason for the strong motor vehicle emissions, particularly the limit standards of aromatics and alkenes. These two unsaturated hydrocarbon species have important effects on air quality (Schell et al., 2001), as decreasing alkenes content can decrease the fire temperatures and reduce NO<sub>x</sub> emissions (Tang et al., 2015b). A new study has also reported that gasoline aromatic hydrocarbons had an essential role in urban SOA production enhancement and thus, significantly affected the ambient PM<sub>2.5</sub> (Peng et al., 2017). The limit standards of aromatic and alkene contents in the vehicle gasoline are respectively 40% and 28% for the China IV, implemented starting in 2014; 40% and 24% for the China V, starting in 2017; 35% and 18% for China VI, which is suggested for implementation in 2019 (<http://www.nea.gov.cn/>). In contrast, the limit standards of 35% for aromatics and 18% for alkenes (European IV) in Europe were implemented in 2005. In addition to the lower standards for oil quality, the phenomenon of substandard oil products also

exists, as Tang et al. (2015b) reported that 48.4% of the gasoline samples in northern China exceeded the aromatics limit standard (40%).

(iv) Biomass burning. Biomass burning emissions in northern China are mainly produced by the burning of agricultural straw and thus, often appear during the farming and harvest seasons. These emissions can have a significant impact on the atmospheric chemistry and the climate on both a regional and global scale (Duan et al., 2004; Li et al., 2010; Sun et al., 2016). The source profiles of the factors defined as biomass burning (Fig. 5c, Fig. S2e, S3d and S4e) were aerosols rich in  $K^+$ , which is widely regarded to be a good tracer of biomass burning sources. In addition to  $K^+$ , the fresh smoke plumes of burning biomass also contain significant amounts of  $Na^+$ ,  $Cl^-$ , OC and EC (Wang et al., 2013a), which were also found in the profiles of biomass burning in this study. The annual average contribution of biomass burning to  $PM_{2.5}$  showed higher values in Xinglong (8.9%) than it did at the three urban sites (2.8–5.3%). In addition to its high proportion during the harvest season (autumn, 11.6%), biomass burning emissions exhibited their highest contributions to  $PM_{2.5}$  in winter in Xinglong (14.6%) and recorded low values (1.0–4.4%) in winter at the three urban sites. This pattern can likely be attributed to the fact that a single type of fuel is used by the surrounding rural residents, as bio-fuels (i.e., straw and dry wood) are always utilized for cooking and winter heating (Zhao et al., 2012), which is totally different than the matter used for energy (mainly coal and natural gas) by urban and suburban residents. Similar to the motor vehicle source, the contribution of biomass burning would be higher if the emissions of secondary aerosol precursors (VOCs,  $SO_2$  and  $NO_x$ ), especially VOCs, are considered (Bo et al., 2008; Li et al., 2014; Yuan et al., 2010).

(v) Dust. Road dust from local traffic and construction activities (with abundant concentrations of  $Mg^{2+}$ ,  $Ca^{2+}$  and motor vehicle-related species such as Cu, Zn and Pb) (Han et al., 2007) and soil dust, which is mainly derived from long-range transport (and is more enriched in Al, Ca, Fe, Mg and Mn), were summarized as dust. This source was found to have an obvious seasonality, exhibiting its highest contributions in spring at the urban (17.2–21.0%) and background sites (22.2%). Influenced by the dust from the northwest, this seasonal variation was most significant and regular for soil dust. The factor of road dust was identified at three urban sites, which contributed annual average values of 3.5–7.8% of the  $PM_{2.5}$  but was not extracted from the dust source in Xinglong due to the minor influence of anthropogenic sources.

(vi) Industrial processes. A striking feature of this source was its relatively high concentrations of the mining-related elements, such as V, Mn and Fe, and elements related to pollution produced by industrial processes, including As, Se, Ag, Cd, Tl and Pb. More than 50% of the mass concentrations of the above pollution elements were allocated to this source. The annual average emissions from industrial processes contributed 3.2–11.7% to  $PM_{2.5}$  at the urban sites, which was lowest in Beijing. The industrial processes source (2.9%) in Xinglong may have been the result of the regional transport from regional cities with heavy industrial activity. In Tianjin

and Shijiazhuang (two heavily industrial cities), an oil refining/metal smelting source, characterized by high concentrations of V, Mn, Fe, Co and Ni (Mohiuddin et al., 2014), was extracted from the emission source of industrial processes, contributing 2.8% (Tianjin) and 0.7% (Shijiazhuang) to the PM<sub>2.5</sub>.

5 In summary, secondary inorganic aerosol (40.5%) and motor vehicle exhaust (24.9%) were the largest PM<sub>2.5</sub> sources in Beijing and have greater values than the results of the 2010 study by Wu et al. (2014). The contribution of motor vehicle exhaust was close to that provided by the Beijing Municipal Environmental Protection Bureau (19.9–22.4%, <http://www.bjepb.gov.cn/>) (Table S3). Compared with those of Beijing, there were more complicated sources of PM<sub>2.5</sub> in Tianjin and  
10 Shijiazhuang. Motor vehicle exhaust was also an important source at the two sites, but the contribution (15.2% in Tianjin and 17.3% in Shijiazhuang) was lower than that in Beijing, which was consistent with the results published by the Environmental Protection Bureau (EPB) (Table S3). However, coal combustion became an important source in Tianjin (12.4%) and Shijiazhuang (15.5%), which was slightly lower than that from the Environmental Protection Bureau and that  
15 given by Liu et al. (2017a) (16.5% in Tianjin). The biggest PM<sub>2.5</sub> source in Tianjin (29.2%) and Shijiazhuang (36.4%) was still secondary inorganic aerosol, of which the contribution in Tianjin was close to that of Liu et al. (2017a) (26.1%).

### 3.4 Evolution at different pollution levels

By using the PM<sub>2.5</sub> pollution grading standards of the Air Quality Index (AQI) technical  
20 regulations (HJ 633-2012) formulated by the Chinese Ministry of Environmental Protection as a reference, and considering the quantity of samples analyzed in this study, days with average concentrations of PM<sub>2.5</sub> < 75, 75 ≤ PM<sub>2.5</sub> < 150 and PM<sub>2.5</sub> ≥ 150 μg/m<sup>3</sup> were defined as clean, moderate pollution and heavy pollution days, respectively. The seasonal distributions of sample quantities at different pollution levels are listed in Table S1.

#### 3.4.1 Evolution of chemical components

The evolutions of the chemical compositions at different pollution levels during the entire  
observational period and in each season are shown in Fig. 7 and Fig. S5, respectively, from which we can see that nearly all of the chemical components increased continuously and noticeably with the aggravation of pollution. A remarkable increase of carbonaceous aerosols was observed during  
30 the pollution process, in which the annual average OC and EC concentrations on heavy pollution days were 3.5–7.0 and 4.6–5.9 times as high as they were on clean days, respectively. On an annual average, the OC/EC mass ratio decreased significantly with the pollution levels in Beijing, with its value varying from 3.4 (clean days) to 2.9 (moderate pollution days) to 2.1 (heavy pollution days). Tianjin also recorded a similar but milder pattern (varying from 2.3 to 2.0 to 1.9,  
35 respectively). This trend at the two sites has also been found in the investigation of specific

pollution processes in summer from Jun 29 to Jul 8, in winter from Jan 11 to 16, and in spring from Mar 23 to Apr 1 (The extreme haze episode in autumn from October 5 to 11 was not analyzed due to many missing samples) (Fig. 8). As reported by Watson et al. (2001), lower OC/EC ratios are emitted from motor vehicles (1.1) than are emitted from coal combustion (2.7) and biomass burning (9.0). Saarikoski et al. (2008) have also documented an OC/EC ratio of 6.6 for biomass burning and of 0.71 for traffic emissions. Therefore, we speculate that this pattern of variations of the OC/EC ratio in Beijing may be influenced by the strengthened contributions of local motor vehicle exhaust under heavily polluted conditions due to weakened regional transports, which usually contribute most during the initial and growth stages of haze episodes, while decreasing during the peak pollution stage. This mechanism has been confirmed in some specific pollution processes in Beijing (Liu et al., 2016b; Tang et al., 2015a). By using CAMx (Comprehensive Air Quality Model with Extensions), Wang et al. (2017) also documented that the extreme haze episode during January 2013 in urban Beijing was dominated by local contributions. Therefore, the fact that the OC/EC ratio decreases with the increasing development of haze pollution indicates the key role of local traffic emissions in the haze processes of Beijing.

In addition, SNA generally significantly contribute to the enhancement of the PM<sub>2.5</sub> mass during pollution events, particularly in Beijing and Xinglong as the contribution of SNA increased remarkably from 34.5% on clean days to 44.2% on moderate pollution days to 51.3% on heavy pollution days in Beijing and from 41.2% to 57.5% to 68.3%, respectively, in Xinglong. Sulfate, nitrate and ammonium all clearly increased with the aggravation of pollution in Xinglong, suggesting that its high PM<sub>2.5</sub> loadings mainly resulted from the intensifying secondary transformations of gaseous pollutants (SO<sub>2</sub>, NO<sub>x</sub> and NH<sub>3</sub>) during stagnant meteorological conditions in the background area. However, in Beijing, only the contribution of nitrate (except in summer), the formation of which is local dominant (Guo et al., 2010), recorded a pronounced increase during the pollution process (Fig. S5), thus indicating that the haze pollution in Beijing mainly resulted from the secondary transformation of NO<sub>x</sub> that was mainly derived from local traffic emissions, once again reflecting the dominant contribution of local motor vehicle exhaust to Beijing haze episodes. An average increase in the contributions of SNA during the pollution process was not observed but did occur in all seasons except for spring in Tianjin and Shijiazhuang (Fig. S5), while the mineral dust contribution increased considerably in spring, indicating the important role of dust in the formation of spring haze at the two study sites.

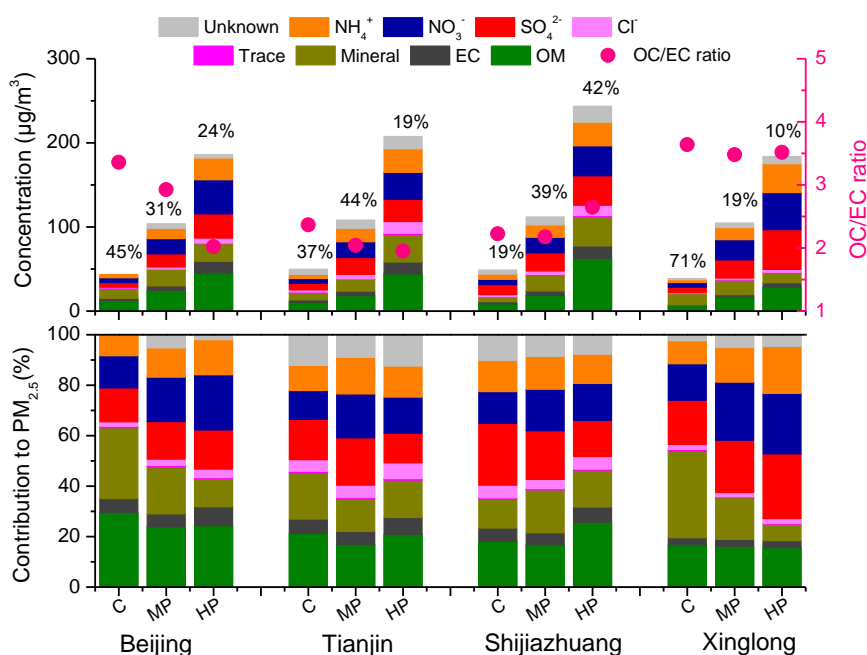

Figure 7. The evolutions of each aerosol chemical species and the ratio of OC/EC (marked with pink dots) at different pollution levels during the entire observational period. C, MP, and HP represent clean days ( $PM_{2.5} < 75 \mu\text{g}/\text{m}^3$ ), moderate pollution days ( $75 \leq PM_{2.5} < 150 \mu\text{g}/\text{m}^3$ ) and heavy pollution days ( $PM_{2.5} \geq 150 \mu\text{g}/\text{m}^3$ ), respectively. "%" represents the proportion of the filter sample quantity at each pollution level out of the total samples.

From the above analysis, it can be seen that the chemical characteristics of haze pollution varied by season and site. The most prominent feature in summer was the intensive formation of SNA, which was observed simultaneously at the three urban sites on a regional scale during the period from Jun 29 to Jul 8 (Fig. 8a). The SNA contributed to the elevation of  $PM_{2.5}$  concentration; SNA showed a substantial increase of a factor of 5.7, from  $22.6 \mu\text{g}/\text{m}^3$  during the clean period to  $128.7 \mu\text{g}/\text{m}^3$  during the haze episodes (Jul 2-N to Jul 4-N and Jul 5-N to Jul 7-N) in Beijing, and a corresponding increase of the contribution of SNA to  $PM_{2.5}$  from 45.7% to 72.5%; the enhancement ratios were 4.4 and 3.4 in Tianjin and Shijiazhuang, respectively. The large increase in the concentrations and contributions of SNA during the haze process was observed in many previous studies and is mainly attributed to the enhanced secondary conversions via the enhanced heterogeneous reactions under relatively high humidity conditions during the haze periods (Fig. S6, averaging 67% during haze episodes and 37% during clean periods in summer in Beijing, as measured in this study) (Huang et al., 2016; Sun et al., 2013; Wang et al., 2012b; Yang et al., 2015). The degree of secondary formation of sulfate and nitrate is commonly estimated using the sulfur oxidation ratio ( $SOR = n\text{-SO}_4^{2-} / (n\text{-SO}_4^{2-} + n\text{-SO}_2)$ , where n refers to molar concentration) and the nitrogen oxidation ratio ( $NOR = n\text{-NO}_3^- / (n\text{-NO}_3^- + n\text{-NO}_2)$ ), respectively (Huang et al., 2016; Zhao et al., 2013d). Higher values of the SOR and NOR indicate that more gaseous  $\text{SO}_2$  and  $\text{NO}_2$  would be oxidized to sulfate and nitrate in the atmosphere. In this study, the SOR and NOR were

significantly elevated during the increases of  $PM_{2.5}$  concentrations during the summer period and remained at a high level during haze episodes in Beijing (averaging 0.92 for SOR and 0.38 for NOR), Tianjin (0.83 and 0.41) and Shijiazhuang (0.65 and 0.44). In autumn, Yang et al. (2015) also revealed that the intense secondary formation of SNA contributed most of the formation of the hazes in October 2014, with the SOR and NOR values increasing considerably during the haze episodes. Similar variations were also observed in winter, but the formation of SNA in winter was much weaker than that in summer and autumn, with SOR values of only 0.18–0.35 during the regional haze episode (Jan 13 to 15) and NOR values of 0.20–0.22 at the three urban sites. However, the increases of the SNA concentrations were still significant during the winter haze episode. In addition, the increase in OM was pronounced during the regional haze episode in winter at the three urban sites, exhibiting the highest OM values during this episode with average values of 57.3, 51.8 and 133.4  $\mu\text{g}/\text{m}^3$  in Beijing, Tianjin and Shijiazhuang, respectively, which were 3.5, 4.1 and 5.9 times of those during the clean periods, while the enhancement ratio was only 1.1–1.4 in summer period. During the winter haze episode, SNA and OM both increased substantially and dominated the  $PM_{2.5}$ , such that the respective contributions of SNA and OM were 42.6% and 26.1% in Beijing, 53.8% and 23.3% in Tianjin, and 43.2% and 37.0% in Shijiazhuang. The phenomenon of the significant increase of SNA and OM in winter haze episode was also observed by Zhao et al.(2013c) and (Huang et al., 2014), indicating that the winter haze may be largely driven by secondary aerosol formation, which could be identified as a common characteristic of winter pollution in this region. Compared to winter, the SOR and NOR values increased on the whole in spring, but their variations, as well as the variations of SNA and OM, had no apparent regular connection with the fluctuation of  $PM_{2.5}$ , especially in Tianjin and Shijiazhuang. In contrast to those observed in summer and winter, the most striking feature of spring pollution was the enhanced contribution of mineral dust; during the regional dust-haze episode from Mar 29-D to 30-N, the contribution of the mineral dust even reached 60.3% in Shijiazhuang, 51.7% in Tianjin and 47.8% in Beijing on Mar 29-D under the conditions of a strong northerly wind (Fig. S6). Subsequently, the mineral dust decreased while SNA rose gradually with the increase of relative humidity and the shift of the wind direction (Fig. 8 and Fig. S6), and the contribution of SNA to  $PM_{2.5}$  rose to 61.3%, 53.9% and 55.0% on Mar 30-N in Beijing, Tianjin and Shijiazhuang, respectively, again exhibiting secondary pollution characteristics.

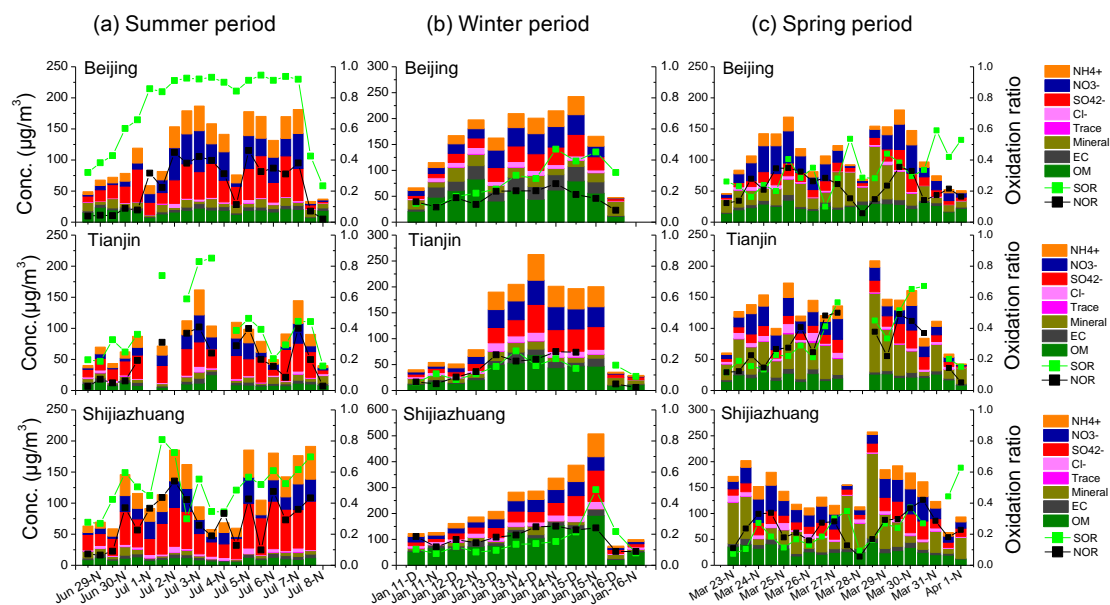

Figure 8. The evolutions of the chemical species, sulfur oxidation rate (SOR) and nitrogen oxidation rate (NOR) in the specific pollution periods in summer (a), winter (b) and spring (c) at the urban sites. D: daytime; N: nighttime

### 5 3.4.2 Evolution of source contributions

In addition to the evolutions of the chemical components during the transitions from clean to pollution processes, significant variations in the contributions of source/factor contribution were also observed and exhibited strong seasonal features and spatial heterogeneities (Fig. 9). However, the common characteristic of each season and site was that the secondary aerosol/inorganic aerosol played a key role in the development of haze pollution, which generally recorded increasing contributions with worsening pollution (except in spring of Shijiazhuang), which was also reported by Huang et al. (2014). Especially in summer and autumn, secondary inorganic aerosol increased most dramatically as a function of high relative humidity and suitable temperature at the urban sites; on heavy pollution days, it accounted for 55.7–75.2% of the  $PM_{2.5}$  in summer and 55.0–61.5% in autumn, thus representing the biggest source of atmospheric  $PM_{2.5}$  during these two seasons. In contrast, in Xinglong, the secondary aerosol source was always the dominant factor of the haze formation, which accounted for 66.7%, 67.5%, 68.4% and 87.0% of the  $PM_{2.5}$  on heavy pollution days in summer, autumn, winter and spring, respectively. In addition, biomass burning was also another important source during the winter pollution process in Xinglong.

In contrast to background site, the emission sources and generation mechanisms of haze pollution were more complex at the urban sites, especially in winter, as the primary emissions, such as the motor vehicle exhaust, coal combustion and industrial processes were also the main sources of heavy pollution in winter. As the main fuel for winter heating in northern China, the



contribution of coal combustion to  $PM_{2.5}$  mainly occurred in winter and was key to the heavy pollution in winter in urban areas, as the contribution increases with increasing pollution levels. In Tianjin and Shijiazhuang, this process contributed nearly 30% to the  $PM_{2.5}$  on heavy pollution days and contributed even more when considering the secondary formation of gaseous precursors emitted by coal combustion. Moreover, the primary emissions of motor vehicles also exerted a remarkable impact on the winter haze pollution, accounting for 26.1% of  $PM_{2.5}$  on heavy pollution days in Beijing, and accounting for more when the secondary conversion of gaseous pollutants in vehicle exhaust are considered, as nitrate-rich secondary aerosol increased from 2.9% on clean days to 19.5% on heavy pollution days during the winter period. On hazy days, low visibility could aggravate urban traffic congestion during rush hour, thus causing more pollutants to be emitted by motor vehicles operating in these conditions (Zhang et al., 2011). Therefore, the winter haze was mainly formed by local processes (local direct emissions and secondary transformation).

In spring, the effect of dust source was highlighted at the urban sites. Most notably, in Shijiazhuang, the mineral dust source significantly contributed to the aerosol pollution process, as its contribution to  $PM_{2.5}$  continuously increased from 9.7% on clean days to 18.6% on moderate pollution days to 22.9% on heavy pollution days. However, along with the increase in pollution levels, the ratio of local road dust source to the overall dust source decreased from 81.6% (on clean days) to 50% (on pollution days), thus reflecting the significant impact of the long-range transport of the northwest dust on the spring aerosol pollution in Shijiazhuang. Differing from the increase of relative humidity during haze episodes of the other seasons, the relative humidity decreased continuously from 64% (clean days) to 47% (moderate pollution days) and to 40% (heavy pollution days) in spring in Shijiazhuang (Table S2). Therefore, the heterogeneous reactions promoted by enhanced water vapor may not be the spring haze formation mechanism in Shijiazhuang, as the contribution of secondary inorganic aerosol decreased remarkably during the haze episode (Fig. 9 and Fig. S5). In contrast, the wind speed and the contribution of the dust source significantly increased during the spring haze period in Shijiazhuang. A similar but much milder pattern (except in terms of wind speed) was also recorded in Tianjin. Therefore, dust pollution, which was mainly the result of long-range transported soil dust and local road dust, contributed to the spring haze in Shijiazhuang and Tianjin.

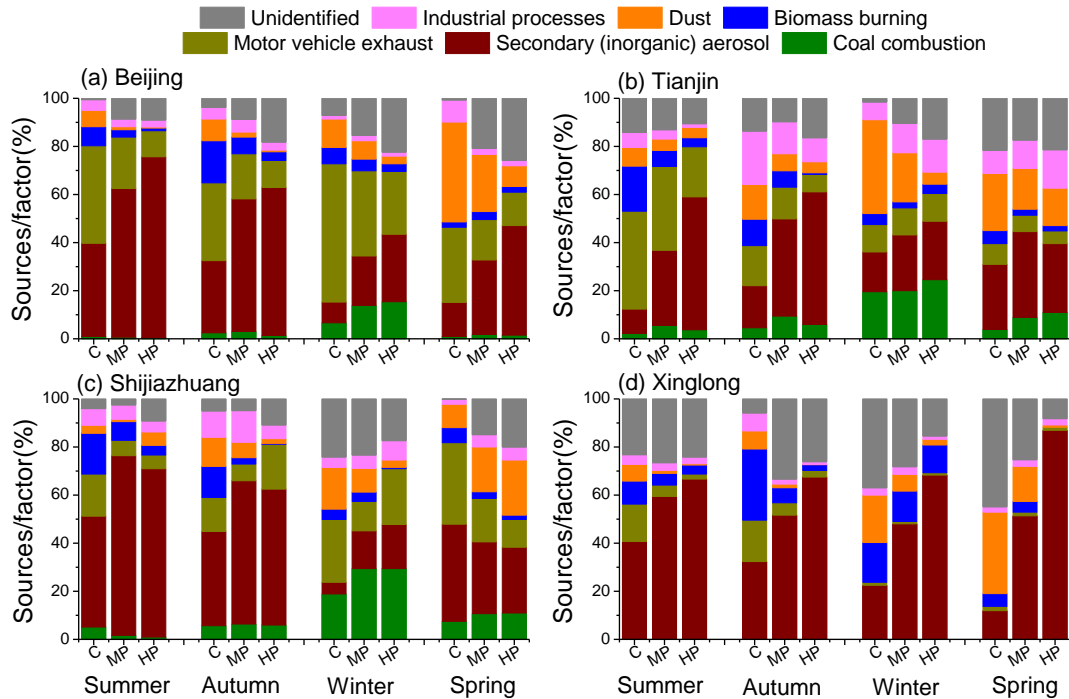

Figure 9. Fractional contributions of sources/factors to the  $PM_{2.5}$  masses at different pollution levels during each season in Beijing (a), Tianjin (b), Shijiazhuang (c) and Xinglong (d). C, MP, and HP represent clean days ( $PM_{2.5} < 75 \mu g/m^3$ ), moderate pollution days ( $75 \leq PM_{2.5} < 150 \mu g/m^3$ ) and heavy pollution days ( $PM_{2.5} \geq 150 \mu g/m^3$ ), respectively.

### 3.5 Backward trajectory analysis

To reveal the pollution patterns and source signals of the  $PM_{2.5}$  carried by air masses from different directions and regions, the source contributions of  $PM_{2.5}$  were grouped according to their trajectory clusters, as shown in Fig. 10. The results in Fig. 10 indicate the important effects of regional transport on  $PM_{2.5}$ . More than half of the air masses (54%, 64%, 51% and 56% for Beijing, Tianjin, Shijiazhuang and Xinglong, respectively) of the entire study period were from the BTH region and Shandong Province. These air masses, which move at slow speeds and at low heights could have carried abundant atmospheric pollutants (i.e., particles and gaseous pollutants) from the areas through which they passed, which may have been accompanied by plenty of water vapor during the transport process (Tao et al., 2012; Zhu et al., 2016), resulting in high  $PM_{2.5}$  mass concentrations driven by local secondary formations at the sampling sites. The air masses (cluster 1 at each site) from the southern direction caused the most serious pollution. Air masses originating from Mongolia were also dominant (27–46%) in this region (cluster 2–3 in Beijing, cluster 4–5 at Tianjin, cluster 3–4 at Shijiazhuang and cluster 3 in Xinglong), and the  $PM_{2.5}$  in these clusters were generally lower than those from the surrounding polluted areas, except for Shijiazhuang and Tianjin in cluster 5 (Fig. 10b). In addition, a small proportion of air masses originating from the Hulunbuir prairie in Inner Mongolia, such as those in cluster 3 in Tianjin and

in cluster 4 in Xinglong, could have carried clean air to the sampling sites, thus causing the corresponding PM<sub>2.5</sub> mass concentrations to be the lowest. In contrast to the other sites, the highest average PM<sub>2.5</sub> concentrations of each cluster were observed in Shijiazhuang, especially in cluster 2, which originated from Inner Mongolia and passed over Shanxi Province before arriving at the sampling sites and corresponded to the highest PM<sub>2.5</sub> value (178.9 µg/m<sup>3</sup>). Although cluster 4 originated from Mongolia and travelled at fast speeds and higher heights, the PM<sub>2.5</sub> was indeed higher than that of cluster 1, which may be because it passed over Inner Mongolia and Shanxi Province and thus could have carried many pollutants from these polluted areas. The PM<sub>2.5</sub> concentration in cluster 3, which originated from Mongolia and passed over Inner Mongolia and northern Hebei (a relatively clean area in the BTH region), was relatively lower (102.1 µg/m<sup>3</sup>). However, the heavy pollution in Shijiazhuang was mainly dominated by cluster 1 (51%) from the south, as cluster 2 and cluster 4 accounted for only 23% and 13% of the trajectories, respectively. Similarly, the haze pollution in Beijing, Tianjin and Xinglong also developed due to the presence of weak southerly air masses from heavily polluted regions. This is consistent with the results of Guo et al. (2014) and Li et al. (2015).

In addition to the different PM<sub>2.5</sub> concentrations in the different clusters, considerable differences in the source contributions were also found. For example, in Shijiazhuang, high PM<sub>2.5</sub> concentrations were observed in each clusters. However, it could also be clearly seen that the source contribution charts of these clusters were very different and that the air masses originating from the BTH region and Shandong Province were characterized by high contribution from secondary inorganic aerosol, while the air masses from the long-range transports were more enriched in dust. Therefore, in Shijiazhuang, the contribution of secondary inorganic aerosol occurred such that cluster 1 > cluster 2 > cluster 3 > cluster 4, whereas that of the dust source exhibited the opposite pattern. Similar patterns were also observed for Xinglong, Beijing and Tianjin in this study. This pattern of secondary inorganic aerosol was also observed by Zhang et al. (2014) in their study in Beijing. As mentioned in Section 3.3, the secondary aerosol was primarily attributed to the transformations of their precursors (SO<sub>2</sub>, NO<sub>x</sub>, NH<sub>3</sub> and VOCs). The slow and near-ground air masses originating from the regional polluted areas could have resulted in stagnant conditions, which could have been conducive to the accumulation of precursors from local emissions and those transported in and to the following secondary transformation. Furthermore, during this transportation, the carried gaseous pollutants could also have undergone secondary transformations and directly resulted in rapid increases in PM<sub>2.5</sub> concentrations in the downwind area (Bressi et al., 2014; Li et al., 2015). Our previous study also revealed that the high concentrations of organic aerosols (OA) in Beijing, especially those low-volatility oxygenated aerosols that are more oxidized and aged, were associated with southerly originating air masses containing secondary regional pollutants (Zhang et al., 2015b).

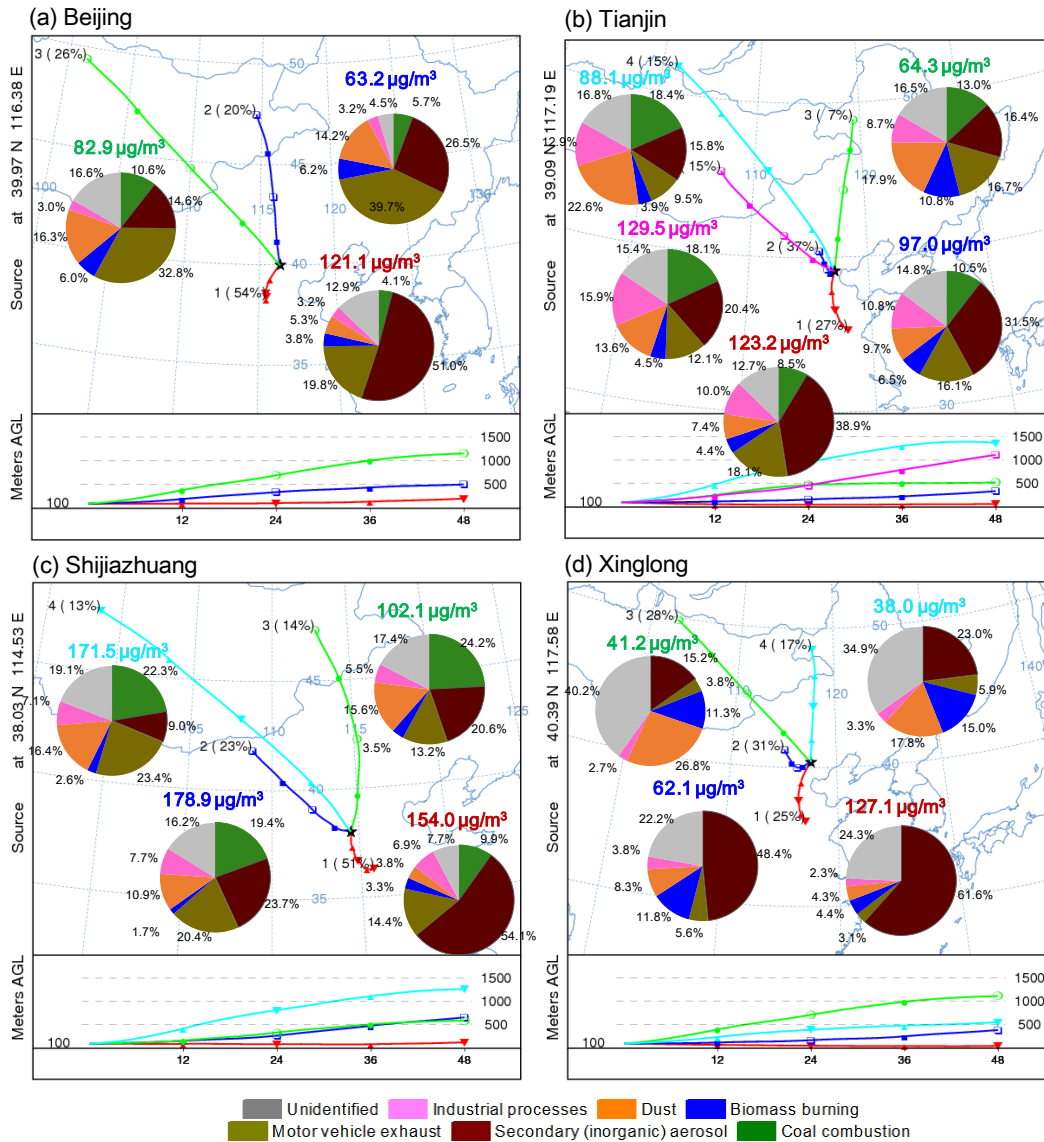

Figure 10. Source contributions resolved from the PMF at each 48 h backward trajectory cluster during the entire study period in Beijing (a), Tianjin (b), Shijiazhuang (c) and Xinglong (d)

#### 4. Conclusions

5 In this study, the chemical compositions and emission sources of fine particulate matter (PM<sub>2.5</sub>) were comprehensively investigated at three urban sites (Beijing, Tianjin and Shijiazhuang) and a background site (Xinglong) in the Beijing-Tianjin-Hebei region. Severe PM<sub>2.5</sub> pollution was found at all three urban sites, especially in Shijiazhuang, and the background site was found to be relatively clean. The seasonal variations of the PM<sub>2.5</sub> concentrations in Xinglong were not significant due to the presence of fewer anthropogenic emissions, while at the urban sites, the lowest PM<sub>2.5</sub> values were observed in summer and the highest values were observed in winter, likely due to the prevalence of winter coal-fired heating and unfavorable meteorological conditions. The chemical compositions of PM<sub>2.5</sub> were similar at the four sites, and the major chemical components were organic matter, secondary inorganic ions (sulfate, nitrate, ammonium)

10

and mineral dust. These components showed distinctive seasonal variabilities, which were closely related to chemical processes, emission sources and meteorological conditions. Organic matter and elemental carbon had the highest recorded values and contributions to PM<sub>2.5</sub> in winter, sulfate peaked in summer, while nitrate peaked in autumn, and mineral dust peaked in spring.

5 The PMF model-resolved source analysis showed that coal combustion, motor vehicle  
exhaust, secondary inorganic aerosol, dust and industrial processes were the main sources of PM<sub>2.5</sub>  
in urban areas; however, the dominant source at the background site was the secondary aerosol.  
The drastic secondary formations of gas precursors was the dominant cause of aerosol pollution,  
especially in summer and autumn. In winter, local direct emissions (coal combustion and motor  
10 vehicle exhaust) and secondary formations greatly impacted the haze formation in urban areas,  
while in spring, dust source exerted a significant impact and dominated the pollution in  
Shijiazhuang and Tianjin. In urban atmospheres, especially in Beijing, the contribution of motor  
vehicle exhaust was also prominent in haze formation, as it is the major source of gaseous NO<sub>x</sub>.  
However, in this study, we could not determine the exact contribution of the secondary  
15 transformation of the NO<sub>x</sub> emitted by motor vehicles. Future studies should investigate the  
additional details about these secondary aerosols.

Haze pollution has remarkable regional characteristics, and the severe pollution in the BTH  
region was mainly influenced by the region itself and its surrounding polluted areas to the south.  
Therefore, we question the efficiency of the abatement strategies of emission reductions and air  
20 quality improvement and suggest a joint collaboration of cities in this region, or even throughout  
all of northern China. The reductions of gaseous precursors from fossil fuel combustion, which  
equates to the reduction of emissions from motor vehicles in Beijing probably by improving oil  
quality, and those from coal combustion from Tianjin, Hebei and the surrounding heavily polluted  
provinces, are essential to mitigate the severe haze pollution in BTH region.

25

### **Acknowledgements:**

This study was supported by the Ministry of Science and Technology of China (No.  
2016YFC0202700) and the “Strategic Priority Research Program” of the Chinese Academy of  
Sciences (XDB05020000). The authors acknowledge the NOAA Air Resource Laboratory for its  
30 unrestricted provision of the HYSPLIT trajectory model. We are also thankful to the China  
Meteorological Administration for the meteorological data from Tianjin and Shijiazhuang and to  
Prof. Jianhui Bai from the Institute of Atmospheric Physics, Chinese Academy of Sciences for the  
meteorological data in Xinglong.

35

## References

- Arimoto, R., Duce, R. A., Savoie, D. L., Prospero, J. M., Talbot, R., Cullen, J. D., Tomza, U., Lewis, N. F. and Ray, B. J.: Relationships among aerosol constituents from Asia and the North Pacific during PEM-West A, *J. Geophys. Res. Atmos.*, 101(D1), 2011–2023, doi:10.1029/95JD01071, 1996.
- 5 Bo, Y., Cai, H. and Xie, S. D.: Spatial and temporal variation of historical anthropogenic NMVOCs emission inventories in China, *Atmos. Chem. Phys.*, 8(23), 7297–7316, doi:10.5194/acp-8-7297-2008, 2008.
- Bressi, M., Sciare, J., Gherzi, V., Bonnaire, N., Nicolas, J. B., Petit, J. E., Moukhtar, S., Rosso, A., Mihalopoulos, N. and Féron, A.: A one-year comprehensive chemical characterisation of fine aerosol  
10 (PM<sub>2.5</sub>) at urban, suburban and rural background sites in the region of Paris (France), *Atmos. Chem. Phys.*, 13(15), 7825–7844, doi:10.5194/acp-13-7825-2013, 2013.
- Bressi, M., Sciare, J., Gherzi, V., Mihalopoulos, N., Petit, J. E., Nicolas, J. B., Moukhtar, S., Rosso, A., Féron, A., Bonnaire, N., Poulakis, E. and Theodosi, C.: Sources and geographical origins of fine aerosols in Paris (France), *Atmos. Chem. Phys.*, 14(16), 8813–8839, doi:10.5194/acp-14-8813-2014,  
15 2014.
- Cai, W., Li, K., Liao, H., Wang, H. and Wu, L.: Weather conditions conducive to Beijing severe haze more frequent under climate change, *Nat. Clim. Chang. Press*, (March), doi:10.1038/NCLIMATE3249, 2017.
- Cao, J. J., Lee, S. C., Ho, K. F., Zou, S. C., Fung, K., Li, Y., Watson, J. G. and Chow, J. C.: Spatial and  
20 seasonal variations of atmospheric organic carbon and elemental carbon in Pearl River Delta Region, China, *Atmos. Environ.*, 38(27), 4447–4456, doi:10.1016/j.atmosenv.2004.05.016, 2004.
- Cao, J. J., Lee, S. C., Chow, J. C., Watson, J. G., Ho, K. F., Zhang, R. J., Jin, Z. D., Shen, Z. X., Chen, G. C., Kang, Y. M., Zou, S. C., Zhang, L. Z., Qi, S. H., Dai, M. H., Cheng, Y. and Hu, K.: Spatial and  
25 seasonal distributions of carbonaceous aerosols over China, *J. Geophys. Res.*, 112(D22), doi:10.1029/2006jd008205, 2007.
- Cao, J. J., Shen, Z. X., Chow, J. C., Qi, G. W. and Watson, J. G.: Seasonal variations and sources of mass and chemical composition for PM<sub>10</sub> aerosol in Hangzhou, China, *Particuology*, 7(3), 161–168, doi:10.1016/j.partic.2009.01.009, 2009.
- Chen, D., Liu, X., Lang, J., Zhou, Y., Wei, L., Wang, X. and Guo, X.: Estimating the contribution of  
30 regional transport to PM<sub>2.5</sub> air pollution in a rural area on the North China Plain, *Sci. Total Environ.*, 583, 280–291, doi:10.1016/j.scitotenv.2017.01.066, 2017.
- Cheng, Y. F., Zheng, G. J., Wei, C., Mu, Q., Zheng, B., Wang, Z. B., Gao, M., Zhang, Q., He, K. B., Carmichael, G., Po schl, U. and Su, H.: Reactive nitrogen chemistry in aerosol water as a source of sulfate during haze events in China, *Sci. Adv.*, 2(12), e1601530, doi:10.1126/sciadv.1601530, 2016.
- 35 Christoforou, C. S., Salmon, L. G., Hannigan, M. P., Solomon, P. A. and Cass, G. R.: Trends in Fine Particle Concentration and Chemical Composition in Southern California, *J. Air Waste Manage. Assoc.*, 50(1), 43–53, doi:10.1080/10473289.2000.10463985, 2000.
- Du, Z., He, K., Cheng, Y., Duan, F., Ma, Y., Liu, J., Zhang, X., Zheng, M. and Weber, R.: A yearlong

- study of water-soluble organic carbon in Beijing I: Sources and its primary vs. secondary nature, *Atmos. Environ.*, 92, 514–521, doi:10.1016/j.atmosenv.2014.04.060, 2014.
- Duan, F., Liu, X., Yu, T. and Cachier, H.: Identification and estimate of biomass burning contribution to the urban aerosol organic carbon concentrations in Beijing, *Atmos. Environ.*, 38(9), 1275–1282, doi:10.1016/j.atmosenv.2003.11.037, 2004.
- 5 Elliot, A. J., Smith, S., Dobney, A., Thornes, J., Smith, G. E. and Vardoulakis, S.: Monitoring the effect of air pollution episodes on health care consultations and ambulance call-outs in England during March/April 2014: A retrospective observational analysis, *Environ. Pollut.*, 214(July), 903–911, doi:10.1016/j.envpol.2016.04.026, 2016.
- 10 Gao, J., Tian, H., Cheng, K., Lu, L., Wang, Y., Wu, Y., Zhu, C., Liu, K., Zhou, J., Liu, X., Chen, J. and Hao, J.: Seasonal and spatial variation of trace elements in multi-size airborne particulate matters of Beijing, China: Mass concentration, enrichment characteristics, source apportionment, chemical speciation and bioavailability, *Atmos. Environ.*, 99, 257–265, doi:10.1016/j.atmosenv.2014.08.081, 2014.
- 15 Gao, J., Tian, H., Cheng, K., Lu, L., Zheng, M., Wang, S., Hao, J., Wang, K., Hua, S., Zhu, C. and Wang, Y.: The variation of chemical characteristics of PM<sub>2.5</sub> and PM<sub>10</sub> and formation causes during two haze pollution events in urban Beijing, China, *Atmos. Environ.*, 107, 1–8, doi:10.1016/j.atmosenv.2015.02.022, 2015.
- 20 Gu, J., Bai, Z., Li, W., Wu, L., Liu, A., Dong, H. and Xie, Y.: Chemical composition of PM<sub>2.5</sub> during winter in Tianjin, China, *Particuology*, 9(3), 215–221, doi:10.1016/j.partic.2011.03.001, 2011.
- Guo, S., Hu, M., Wang, Z. B., Slanina, J. and Zhao, Y. L.: Size-resolved aerosol water-soluble ionic compositions in the summer of Beijing, implication of regional secondary formation., *Atmos. Chem. Phys.*, 10, 947–959, 2010.
- 25 Guo, S., Hu, M., Zamora, M. L., Peng, J., Shang, D., Zheng, J., Du, Z., Wu, Z., Shao, M., Zeng, L., Molina, M. J. and Zhang, R.: Elucidating severe urban haze formation in China., *Proc. Natl. Acad. Sci. U. S. A.*, 111(49), 17373–8, doi:10.1073/pnas.1419604111, 2014.
- Han, B., Zhang, R., Yang, W., Bai, Z., Ma, Z. and Zhang, W.: Heavy haze episodes in Beijing during January 2013: Inorganic ion chemistry and source analysis using highly time-resolved measurements from an urban site, *Sci. Total Environ.*, 544, 319–329, doi:10.1016/j.scitotenv.2015.10.053, 2016.
- 30 Han, L., Zhuang, G., Cheng, S., Wang, Y. and Li, J.: Characteristics of re-suspended road dust and its impact on the atmospheric environment in Beijing, *Atmos. Environ.*, 41(35), 7485–7499, doi:10.1016/j.atmosenv.2007.05.044, 2007.
- 35 He, H., Wang, Y. S., Ma, Q. X., Ma, J. Z., Chu, B. W., Ji, D., Tang, G. Q., Liu, C., Zhang, H. X. and Hao, J. M.: Mineral dust and NO<sub>x</sub> promote the conversion of SO<sub>2</sub> to sulfate in heavy pollution days, *Sci. Rep.*, 4(2), 1–6, doi:10.1038/srep04172, 2014.
- He, K., Yang, F., Ma, Y., Zhang, Q., Yao, X., Chan, C. K., Cadle, S., Chan, T. and Mulawa, P.: The characteristics of PM<sub>2.5</sub> in Beijing, China, *Atmos. Environ.*, 35, 4959–4970, 2001.
- Hu, M., Peng, J., Sun, K., Yue, D., Guo, S., Wiedensohler, A. and Wu, Z.: Estimation of size-resolved

- ambient particle density based on the measurement of aerosol number, mass, and chemical size distributions in the winter in Beijing, *Env. Sci Technol*, 46(18), 9941–9947, doi:10.1021/es204073t, 2012.
- 5 Huang, C., Chen, C. H., Li, L., Cheng, Z., Wang, H. L., Huang, H. Y., Streets, D. G., Wang, Y. J., Zhang, G. F. and Chen, Y. R.: Emission inventory of anthropogenic air pollutants and VOC species in the Yangtze River Delta region, China, *Atmos. Chem. Phys.*, 11(9), 4105–4120, doi:10.5194/acp-11-4105-2011, 2011.
- 10 Huang, K., Zhuang, G., Lin, Y., Li, J., Sun, Y., Zhang, W., Fu, J. S., Huang, K., Zhuang, G., Lin, Y., Li, J., Sun, Y., Zhang, W. and Fu, J. S.: Relation between optical and chemical properties of dust aerosol over Beijing, China, *J. Geophys. Res.*, 115, 0–16, doi:10.1029/2009JD013212, 2010.
- 15 Huang, R. J., Zhang, Y., Bozzetti, C., Ho, K. F., Cao, J. J., Han, Y., Daellenbach, K. R., Slowik, J. G., Platt, S. M., Canonaco, F., Zotter, P., Wolf, R., Pieber, S. M., Brun, E. A., Crippa, M., Ciarelli, G., Piazzalunga, A., Schwikowski, M., Abbaszade, G., Schnelle-Kreis, J., Zimmermann, R., An, Z., Szidat, S., Baltensperger, U., El Haddad, I. and Prevot, A. S.: High secondary aerosol contribution to particulate pollution during haze events in China, *Nature*, 514(7521), 218–222, doi:10.1038/nature13774, 2014.
- Huang, X. J., Liu, Z. R., Zhang, J. K., Wen, T. X., Ji, D. S. and Wang, Y. S.: Seasonal variation and secondary formation of size-segregated aerosol water-soluble inorganic ions during pollution episodes in Beijing, *Atmos. Res.*, 168(September), 70–79, doi:10.1016/j.atmosres.2015.08.021, 2016.
- 20 Ianniello, A., Spataro, F., Esposito, G., Allegrini, I., Hu, M. and Zhu, T.: Chemical characteristics of inorganic ammonium salts in PM<sub>2.5</sub> in the atmosphere of Beijing (China), *Atmos. Chem. Phys.*, 11(21), 10803–10822, doi:10.5194/acp-11-10803-2011, 2011.
- 25 Karnae, S. and John, K.: Source apportionment of fine particulate matter measured in an industrialized coastal urban area of South Texas, *Atmos. Environ.*, 45(23), 3769–3776, doi:10.1016/j.atmosenv.2011.04.040, 2011.
- Li, J., Du, H. Y., Wang, Z. F., Sun, Y. Le, Yang, W. Y., Li, J. J., Tang, X. and Fu, P. Q.: Rapid formation of a severe regional winter haze episode over a mega-city cluster on the North China Plain, *Environ. Pollut.*, 1–11, doi:10.1016/j.envpol.2017.01.063, 2017.
- 30 Li, L., Chen, Y., Zeng, L., Shao, M., Xie, S., Chen, W., Lu, S., Wu, Y. and Cao, W.: Biomass burning contribution to ambient volatile organic compounds (VOCs) in the chengdu-chongqing region (CCR), China, *Atmos. Environ.*, 99, 403–410, doi:10.1016/j.atmosenv.2014.09.067, 2014.
- Li, P. F., Yan, R. C., Yu, S. C., Wang, S., Liu, W. P. and Bao, H. M.: Reinstatement regional transport of PM<sub>2.5</sub> as a major cause of severe haze in Beijing, *Proc. Natl. Acad. Sci.*, 112(21), 2–3, doi:10.1073/pnas.1502596112, 2015.
- 35 Li, W. J., Shao, L. Y. and Buseck, P. R.: Haze types in Beijing and the influence of agricultural biomass burning, *Atmos. Chem. Phys.*, 10(17), 8119–8130, doi:10.5194/acp-10-8119-2010, 2010.
- Li, X. R., Song, A. L., Wang, Y. F., Sun, Y., Liu, Z. R. and Wang, Y. S.: Analysis on water-soluble inorganic ions in the atmospheric aerosol of Xinglong, *Environ. Sci.*, 34(1), 15–20(in Chinese), 2013.



- Liang, C. S., Duan, F. K., He, K. B. and Ma, Y. L.: Review on recent progress in observations, source identifications and countermeasures of PM<sub>2.5</sub>, *Env. Int.*, 86, 150–170, doi:10.1016/j.envint.2015.10.016, 2016.
- 5 Liu, B., Yang, J., Yuan, J., Wang, J., Dai, Q., Li, T., Bi, X., Feng, Y., Xiao, Z., Zhang, Y. and Xu, H.: Source apportionment of atmospheric pollutants based on the online data by using PMF and ME2 models at a megacity, China, *Atmos. Res.*, 185, 22–31, doi:10.1016/j.atmosres.2016.10.023, 2017a.
- 10 Liu, T. T., Gong, S. L., He, J. J., Yu, M., Wang, Q. F., Li, H. R., Liu, W., Zhang, J., Li, L., Wang, X. G., Li, S. L., Lu, Y. L., Du, H. T., Wang, Y. Q., Zhou, C. H., Liu, H. L. and Zhao, Q. C.: Attributions of meteorological and emission factors to the 2015 winter severe haze pollution episodes in China's Jing-Jin-Ji area, *Atmos. Chem. Phys.*, 17, 2971–2980, doi:10.5194/acp-17-2971-2017, 2017b.
- Liu, Z. R., Hu, B., Zhang, J. K., Yu, Y. C. and Wang, Y. S.: Characteristics of aerosol size distributions and chemical compositions during wintertime pollution episodes in Beijing, *Atmos. Res.*, 168(August 2015), 1–12, doi:10.1016/j.atmosres.2015.08.013, 2016a.
- 15 Liu, Z. R., Wang, Y. S., Hu, B., Ji, D. S., Zhang, J. K., Wu, F. K., Wan, X. and Wang, Y. H.: Source apportionment of fine particle number and volume concentration during severe haze pollution in Beijing in January 2013, *Environ. Sci. Pollut. Res.*, 23(7), 6845–6860, doi:10.1007/s11356-015-5868-6, 2016b.
- Mason, B.: *Principles of Geochemistry*, New York, Wiley., 1966.
- 20 Mohiuddin, K., Strezov, V., Nelson, P. F. and Stelcer, E.: Characterisation of trace metals in atmospheric particles in the vicinity of iron and steelmaking industries in Australia, *Atmos. Environ.*, 83(February), 72–79, doi:10.1016/j.atmosenv.2013.11.011, 2014.
- Peng, J., Hu, M., Du, Z., Wang, Y., Zheng, J., Zhang, W., Yang, Y., Qin, Y., Zheng, R., Xiao, Y., Wu, Y., Lu, S., Wu, Z., Guo, S., Mao, H. and Shuai, S.: Gasoline aromatic: a critical determinant of urban secondary organic aerosol formation, *Atmos. Chem. Phys. Discuss.*, (x), 1–20, doi:10.5194/acp-2017-254, 2017.
- 25 Reff, A., Eberly, S. I. and Bhawe, P. V.: Receptor Modeling of Ambient Particulate Matter Data Using Positive Matrix Factorization: Review of Existing Methods, *J. Air Waste Manag. Assoc.*, 57, 146–154, 2007.
- 30 Saarikoski, S., Timonen, H., Saarnio, K., Aurela, M., Jarvi, M., Keronen, P., Kerminen, V.-M. and Hillamo, R.: Sources of organic carbon in fine particulate matter in northern European urban air, *Atmos. Chem. Phys.*, 8(20), 6281–6295, 2008.
- Schell, B., Ackermann, I. J., Hass, H., Binkowski, F. S. and Ebel, A.: Modeling the formation of secondary organic aerosol within a comprehensive air quality model system, *J. Geophys. Res. Atmos.*, 106(D22), 28275–28293, doi:10.1029/2001JD000384, 2001.
- 35 Shen, R. R., Schäfer, K., Schnelle-Kreis, J., Shao, L. Y., Norra, S., Kramar, U., Michalke, B., Abbaszade, G., Streibel, T., Fricker, M., Chen, Y., Zimmermann, R., Emeis, S. and Schmid, H. P.: Characteristics and sources of PM in seasonal perspective - A case study from one year continuously sampling in Beijing, *Atmos. Pollut. Res.*, 7(2), 235–248, doi:10.1016/j.apr.2015.09.008, 2016.

- Singh, A., Rastogi, N., Patel, A. and Singh, D.: Seasonality in size-segregated ionic composition of ambient particulate pollutants over the Indo-Gangetic Plain: Source apportionment using PMF, *Environ. Pollut.*, 1–10, doi:10.1016/j.envpol.2016.09.010, 2016.
- 5 Sun, Y., Jiang, Q., Wang, Z., Fu, P., Li, J., Yang, T. and Yin, Y.: Investigation of the sources and evolution processes of severe haze pollution in Beijing in January 2013, *J. Geophys. Res.*, 119(7), 4380–4398, doi:10.1002/2014JD021641, 2014.
- Sun, Y. L., Zhuang, G. S., Huang, K., Li, J., Wang, Q. Z., Wang, Y., Lin, Y. F., Fu, J. S., Zhang, W. J., Tang, A. H. and Zhao, X. J.: Asian dust over northern China and its impact on the downstream aerosol chemistry in 2004, *J. Geophys. Res. Atmos.*, 115(11), 1–16, doi:10.1029/2009JD012757, 2010.
- 10 Sun, Y. L., Wang, Z. F., Fu, P. Q., Yang, T., Jiang, Q., Dong, H. B., Li, J. and Jia, J. J.: Aerosol composition, sources and processes during wintertime in Beijing, China, *Atmos. Chem. Phys.*, 13(9), 4577–4592, doi:10.5194/acp-13-4577-2013, 2013.
- Sun, Y. L., Jiang, Q., Xu, Y. S., Ma, Y., Zhang, Y. J., Liu, X. G., Li, W. J., Li, J., Wang, P. C., Wang, F. and Li, Z. Q.: Aerosol characterization over the North China Plain: Haze life cycle and biomass burning impacts in summer, *J. Geophys. Res. Atmos. Res.*, 121, 2508–2521, doi:10.1002/2015JD024261, 2016.
- 15 Tang, G., Zhu, X., Hu, B., Xin, J., Wang, L., Münkler, C., Mao, G. and Wang, Y.: Impact of emission controls on air quality in Beijing during APEC 2014: Lidar ceilometer observations, *Atmos. Chem. Phys.*, 15, 12667–12680, doi:10.5194/acp-15-12667-2015, 2015a.
- 20 Tang, G. Q., Sun, J., Wu, F. K., Sun, Y., Zhu, X. W., Geng, Y. J. and Wang, Y. S.: Organic composition of gasoline and its potential effects on air pollution in North China, *Sci. China Chem.*, 58(9), 1416–1425, doi:10.1007/s11426-015-5464-0, 2015b.
- Tang, G. Q., Zhang, J. Q., Zhu, X. W., Song, T., Münkler, C., Hu, B., Schäfer, K., Liu, Z., Zhang, J. K., Wang, L. L., Xin, J. Y., Suppan, P. and Wang, Y. S.: Mixing layer height and its implications for air pollution over Beijing, China, *Atmos. Chem. Phys.*, 16(4), 2459–2475, doi:10.5194/acp-16-2459-2016, 2016a.
- 25 Tang, G. Q., Chao, N., Wang, Y. S. and Chen, J. S.: Vehicular emissions in China in 2006 and 2010, *J. Environ. Sci. (China)*, 48, 179–192, doi:10.1016/j.jes.2016.01.031, 2016b.
- Tang, G. Q., Zhao, P. S., Wang, Y. H., Gao, W. K., Cheng, M. T., Xin, J. Y., Li, X. and Wang, Y. S.: Mortality and air pollution in Beijing: The long-term relationship, *Atmos. Environ.*, 150, 238–243, doi:10.1016/j.atmosenv.2016.11.045, 2017.
- 30 Tao, J., Zhang, L. M., Cao, J. J., Hsu, S. C., Xia, X. G., Zhang, Z., Lin, Z. J., Cheng, T. T. and Zhang, R. J.: Characterization and source apportionment of aerosol light extinction in Chengdu, southwest China, *Atmos. Environ.*, 95, 552–562, doi:10.1016/j.atmosenv.2014.07.017, 2014a.
- 35 Tao, M., Chen, L., Xiong, X., Zhang, M., Ma, P., Tao, J. and Wang, Z.: Formation process of the widespread extreme haze pollution over northern China in January 2013: Implications for regional air quality and climate, *Atmos. Environ.*, 98, 417–425, doi:10.1016/j.atmosenv.2014.09.026, 2014b.
- Tao, M. H., Chen, L. F., Su, L. and Tao, J. H.: Satellite observation of regional haze pollution over the

- North China Plain, *J. Geophys. Res. Atmos.*, 117, D12203, doi:10.1029/2012JD017915, 2012.
- Tian, S. L., Pan, Y. P. and Wang, Y. S.: Size-resolved source apportionment of particulate matter in urban Beijing during haze and non-haze episodes, *Atmos. Chem. Phys.*, 16(1), 1–19, doi:10.5194/acp-16-1-2016, 2016.
- 5 Turpin, B. J. and Lim, H.: Species Contributions to PM<sub>2.5</sub> Mass Concentrations: Revisiting Common Assumptions for Estimating Organic Mass, *Aerosol Sci. Technol.*, 35(1), 602–610, doi:10.1080/02786820119445, 2001.
- U.S. Environmental Protection Agency: EPA Positive Matrix Factorization (PMF) 5.0 Fundamentals and User Guide, 2014.
- 10 Wang, G., Cheng, S. Y., Li, J. B., Lang, J. L., Wen, W., Yang, X. W. and Tian, L.: Source apportionment and seasonal variation of PM<sub>2.5</sub> carbonaceous aerosol in the Beijing-Tianjin-Hebei region of China, *Env. Monit Assess*, 187(3), 143, doi:10.1007/s10661-015-4288-x, 2015a.
- Wang, G., Zhang, R., Gomez, M. E., Yang, L., Levy Zamora, M., Hu, M., Lin, Y., Peng, J., Guo, S., Meng, J., Li, J., Cheng, C., Hu, T., Ren, Y., Wang, Y., Gao, J., Cao, J., An, Z., Zhou, W., Li, G., Wang, J., Tian, P., Marrero-Ortiz, W., Secrest, J., Du, Z., Zheng, J., Shang, D., Zeng, L., Shao, M., Wang, W., 15 Huang, Y., Wang, Y., Zhu, Y., Li, Y., Hu, J., Pan, B., Cai, L., Cheng, Y., Ji, Y., Zhang, F., Rosenfeld, D., Liss, P. S., Duce, R. A., Kolb, C. E. and Molina, M. J.: Persistent sulfate formation from London Fog to Chinese haze., *Proc. Natl. Acad. Sci. U. S. A.*, 113(48), 13630–13635, doi:10.1073/pnas.1616540113, 2016a.
- 20 Wang, G. H., Zhou, B. H., Cheng, C. L., Cao, J. J., Li, J. J., Meng, J. J., Tao, J., Zhang, R. J. and Fu, P. Q.: Impact of Gobi desert dust on aerosol chemistry of Xi'an, inland China during spring 2009: differences in composition and size distribution between the urban ground surface and the mountain atmosphere, *Atmos. Chem. Phys.*, 13(2), 819–835, doi:10.5194/acp-13-819-2013, 2013a.
- Wang, J., Pan, Y. P., Tian, S. L., Chen, X., Wang, L. and Wang, Y. S.: Size distributions and health 25 risks of particulate trace elements in rural areas in northeastern China, *Atmos. Res.*, 168, 191–204, doi:10.1016/j.atmosres.2015.08.019, 2016b.
- Wang, L. T., Xu, J., Yang, J., Zhao, X. J., Wei, W., Cheng, D. D., Pan, X. M. and Su, J.: Understanding haze pollution over the southern Hebei area of China using the CMAQ model, *Atmos. Environ.*, 56, 69–79, doi:10.1016/j.atmosenv.2012.04.013, 2012a.
- 30 Wang, L. T., Wei, Z., Yang, J., Zhang, Y., Zhang, F. F., Su, J., Meng, C. C. and Zhang, Q.: The 2013 severe haze over southern Hebei, China: Model evaluation, source apportionment, and policy implications, *Atmos. Chem. Phys.*, 14(6), 3151–3173, doi:10.5194/acp-14-3151-2014, 2014a.
- Wang, X. F., Wang, W. X., Yang, L. X., Gao, X. M., Nie, W., Yu, Y. C., Xu, P. J., Zhou, Y. and Wang, Z.: The secondary formation of inorganic aerosols in the droplet mode through heterogeneous aqueous 35 reactions under haze conditions, *Atmos. Environ.*, 63, 68–76, doi:10.1016/j.atmosenv.2012.09.029, 2012b.
- Wang, Y., Yao, L., Wang, L., Liu, Z., Ji, D., Tang, G., Zhang, J., Sun, Y., Hu, B. and Xin, J.: Mechanism for the formation of the January 2013 heavy haze pollution episode over central and eastern China, *Sci. China Earth Sci.*, 57(1), 14–25, doi:10.1007/s11430-013-4773-4, 2013b.

- Wang, Y., Bao, S., Wang, S., Hu, Y., Shi, X., Wang, J., Zhao, B., Jiang, J., Zheng, M., Wu, M., Russell, A. G., Wang, Y. and Hao, J.: Local and regional contributions to fine particulate matter in Beijing during heavy haze episodes, *Sci. Total Environ.*, 580(December), 283–296, doi:10.1016/j.scitotenv.2016.12.127, 2017.
- 5 Wang, Y. H., Liu, Z. R., Zhang, J. K., Hu, B., Ji, D. S., Yu, Y. C. and Wang, Y. S.: Aerosol physicochemical properties and implications for visibility during an intense haze episode during winter in Beijing, *Atmos. Chem. Phys.*, 15(6), 3205–3215, doi:10.5194/acp-15-3205-2015, 2015b.
- Wang, Y. S., Yao, L., Wang, L. L., Liu, Z. R., Ji, D. S., Tang, G. Q., Zhang, J. K., Sun, Y., Hu, B. and Xin, J. Y.: Mechanism for the formation of the January 2013 heavy haze pollution episode over central and eastern China, *Sci. China Earth Sci.*, 57(1), 14–25, doi:10.1007/s11430-013-4773-4, 2014b.
- 10 Watson, J. G., Chow, J. C. and Houck, J. E.: PM<sub>2.5</sub> chemical source profiles for vehicle exhaust, vegetative burning, geological material, and coal burning in Northwestern Colorado during 1995, *Chemosphere*, 43(8), 1141–1151, doi:10.1016/S0045-6535(00)00171-5, 2001.
- Wedepohl, K. H.: The composition of the continental crust, *Geochim. Cosmochim. Acta*, 59(7), 1217–1232, 1995.
- 15 Wu, D., Mao, J. T., Deng, X. J., Tie, X. X., Zhang, Y. H., Zeng, L. M., Li, F., Tan, H. B., Bi, X. Y., Huang, X. Y., Chen, J. and Deng, T.: Black carbon aerosols and their radiative properties in the Pearl River Delta region, *Sci. China, Ser. D Earth Sci.*, 52(8), 1152–1163, doi:10.1007/s11430-009-0115-y, 2009.
- 20 Wu, R., Dai, H. C., Geng, Y., Xie, Y., Masui, T., Liu, Z. Q. and Qian, Y. Y.: Economic Impacts from PM 2.5 Pollution-Related Health Effects: A Case Study in Shanghai, *Environ. Sci. Technol.*, acs.est.7b00026, doi:10.1021/acs.est.7b00026, 2017.
- Wu, S., Deng, F., Wei, H., Huang, J., Wang, X., Hao, Y., Zheng, C., Qin, Y., Lv, H., Shima, M. and Guo, X.: Association of cardiopulmonary health effects with source-appointed ambient fine particulate in Beijing, China: A combined analysis from the healthy volunteer natural relocation (HVNRR) study, *Environ. Sci. Technol.*, 48(6), 3438–3448, doi:10.1021/es404778w, 2014.
- 25 Xie, M., Piedrahita, R., Dutton, S. J., Milford, J. B., Hemann, J. G., Peel, J. L., Miller, S. L., Kim, S. Y., Vedal, S., Sheppard, L. and Hannigan, M. P.: Positive matrix factorization of a 32-month series of daily PM<sub>2.5</sub> speciation data with incorporation of temperature stratification, *Atmos. Environ.*, 65, 11–20, doi:10.1016/j.atmosenv.2012.09.034, 2013a.
- 30 Xie, M., Barsanti, K. C., Hannigan, M. P., Dutton, S. J. and Vedal, S.: Positive matrix factorization of PM<sub>2.5</sub> – eliminating the effects of gas/particle partitioning of semivolatile organic compounds, *Atmos. Chem. Phys.*, 13(15), 7381–7393, doi:10.5194/acp-13-7381-2013, 2013b.
- Xin, J., Wang, Y., Pan, Y., Ji, D., Liu, Z., Wen, T., Wang, Y., Li, X., Sun, Y., Sun, J., Wang, P., Wang, G., Wang, X., Cong, Z., Song, T., Hu, B., Wang, L., Tang, G., Gao, W., Guo, Y., Miao, H., Tian, S. and Wang, L.: The campaign on atmospheric aerosol research network of China: CARE-China, *Bull. Am. Meteorol. Soc.*, 96(7), 1137–1155, doi:10.1175/BAMS-D-14-00039.1, 2015.
- 35 Xu, W. Y., Zhao, C. S., Ran, L., Deng, Z. Z., Liu, P. F., Ma, N., Lin, W. L., Xu, X. B., Yan, P., He, X., Yu, J., Liang, W. D. and Chen, L. L.: Characteristics of pollutants and their correlation to

- meteorological conditions at a suburban site in the North China Plain, *Atmos. Chem. Phys.*, 11(9), 4353–4369, doi:10.5194/acp-11-4353-2011, 2011.
- Yang, L. X., Zhou, X. H., Wang, Z., Zhou, Y., Cheng, S. H., Xu, P. J., Gao, X. M., Nie, W., Wang, X. F. and Wang, W. X.: Airborne fine particulate pollution in Jinan, China: Concentrations, chemical compositions and influence on visibility impairment, *Atmos. Environ.*, 55, 506–514, doi:10.1016/j.atmosenv.2012.02.029, 2012.
- Yang, Y. R., Liu, X. G., Qu, Y., An, J. L., Jiang, R., Zhang, Y. H., Sun, Y. L., Wu, Z. J., Zhang, F., Xu, W. Q. and Ma, Q. X.: Characteristics and formation mechanism of continuous hazes in China: A case study during the autumn of 2014 in the North China Plain, *Atmos. Chem. Phys.*, 15(14), 8165–8178, doi:10.5194/acp-15-8165-2015, 2015.
- Ying, Q., Wu, L. and Zhang, H. L.: Local and inter-regional contributions to PM<sub>2.5</sub> nitrate and sulfate in China, *Atmos. Environ.*, 94, 582–592, doi:10.1016/j.atmosenv.2014.05.078, 2014.
- Yuan, B., Liu, Y., Shao, M., Lu, S. H. and Streets, D. G.: Biomass burning contributions to ambient VOCs species at a receptor site in the Pearl River delta (PRD), China, *Environ. Sci. Technol.*, 44(12), 4577–4582, doi:10.1021/es1003389, 2010.
- Zhang, J. K., Sun, Y., Liu, Z. R., Ji, D. S., Hu, B., Liu, Q. and Wang, Y. S.: Characterization of submicron aerosols during a month of serious pollution in Beijing, 2013., *Atmos. Chem. Phys.*, 14, 2887–2903, doi:10.5194/acp-14-2887-2014, 2014.
- Zhang, J. K., Wang, Y. S., Huang, X. J., Liu, Z. R., Ji, D. S. and Sun, Y.: Characterization of Organic Aerosols in Beijing Using an Aerodyne High-Resolution Aerosol Mass Spectrometer, *Adv. Atmos. Sci.*, 32, 877–888, doi:10.1007/s00376-014-4153-9, 2015a.
- Zhang, J. K., Wang, L. L., Wang, Y. H. and Wang, Y. S.: Submicron aerosols during the Beijing Asia-Pacific Economic Cooperation conference in 2014, *Atmos. Environ.*, 124, 224–231, doi:10.1016/j.atmosenv.2015.06.049, 2016.
- Zhang, K., Batterman, S. and Dion, F.: Vehicle emissions in congestion: Comparison of work zone, rush hour and free-flow conditions, *Atmos. Environ.*, 45(11), 1929–1939, doi:10.1016/j.atmosenv.2011.01.030, 2011.
- Zhang, R., Jing, J., Tao, J., Hsu, S. C., Wang, G., Cao, J., Lee, C. S. L., Zhu, L., Chen, Z., Zhao, Y. and Shen, Z.: Chemical characterization and source apportionment of PM<sub>2.5</sub> in Beijing: seasonal perspective, *Atmos. Chem. Phys.*, 13(14), 7053–7074, doi:10.5194/acp-13-7053-2013, 2013.
- Zhang, R. Y., Wang, G. H., Guo, S., Zamora, M. L., Ying, Q., Lin, Y., Wang, W. gang, Hu, M. and Wang, Y.: Formation of urban fine particulate matter, *Chem Rev*, 115(10), 3803–3855, doi:10.1021/acs.chemrev.5b00067, 2015b.
- Zhang, X. Y., Wang, Y. Q., Niu, T., Zhang, X. C., Gong, S. L., Zhang, Y. M. and Sun, J. Y.: Atmospheric aerosol compositions in China: spatial/temporal variability, chemical signature, regional haze distribution and comparisons with global aerosols, *Atmos. Chem. Phys.*, 12(2), 779–799, doi:10.5194/acp-12-779-2012, 2012.
- Zhang, Y. J., Zheng, M., Cai, J., Yan, C. Q., Hu, Y. T., Russell, A. G., Wang, X. S., Wang, S. X. and

- Zhang, Y. H.: Comparison and overview of PM<sub>2.5</sub> source apportionment methods, *Chinese Sci. Bull. (Chinese Version)*, 60(2), 109–121, doi:10.1360/n972014-00975, 2015c.
- Zhang, Y. L. and Cao, F.: Fine particulate matter (PM 2.5) in China at a city level, *Sci Rep*, 5, 14884, doi:10.1038/srep14884, 2015.
- 5 Zhao, B., Wang, P., Ma, J. Z., Zhu, S., Pozzer, A. and Li, W.: A high-resolution emission inventory of primary pollutants for the Huabei region, China, *Atmos. Chem. Phys.*, 12(1), 481–501, doi:10.5194/acp-12-481-2012, 2012.
- Zhao, P. S., Dong, F., Yang, Y. D., He, D., Zhao, X. J., Zhang, W. Z., Yao, Q. and Liu, H. Y.: Characteristics of carbonaceous aerosol in the region of Beijing, Tianjin, and Hebei, China, *Atmos. Environ.*, 71, 389–398, doi:10.1016/j.atmosenv.2013.02.010, 2013a.
- 10 Zhao, P. S., Dong, F., He, D., Zhao, X. J., Zhang, X. L., Zhang, W. Z., Yao, Q. and Liu, H. Y.: Characteristics of concentrations and chemical compositions for PM<sub>2.5</sub> in the region of Beijing, Tianjin, and Hebei, China, *Atmos. Chem. Phys.*, 13(9), 4631–4644, doi:10.5194/acp-13-4631-2013, 2013b.
- Zhao, P. S., Dong, F., He, D., Zhao, X. J., Zhang, X. L., Zhang, W. Z., Yao, Q. and Liu, H. Y.: Characteristics of concentrations and chemical compositions for PM<sub>2.5</sub> in the region of Beijing, Tianjin, and Hebei, China, *Atmos. Chem. Phys.*, 13(9), 4631–4644, doi:10.5194/acp-13-4631-2013, 2013c.
- 15 Zhao, X. J., Zhang, X. L., Xu, X. F., Xu, J., Meng, W. and Pu, W. W.: Seasonal and diurnal variations of ambient PM<sub>2.5</sub> concentration in urban and rural environments in Beijing, *Atmos. Environ.*, 43(18), 2893–2900, doi:10.1016/j.atmosenv.2009.03.009, 2009.
- 20 Zhao, X. J., Zhao, P. S., Xu, J., Meng, W., Pu, W. W., Dong, F., He, D. and Shi, Q. F.: Analysis of a winter regional haze event and its formation mechanism in the North China Plain, *Atmos. Chem. Phys.*, 13(11), 5685–5696, doi:10.5194/acp-13-5685-2013, 2013d.
- Zhu, X., Tang, G., Hu, B., Wang, L., Xin, J., Zhang, J., Liu, Z., Munkel, C. and Wang, Y.: Regional pollution and its formation mechanism over North China Plain: A case study with ceilometer observations and model simulations, *J. Geophys. Res. Atmos.*, 1–15, doi:10.1002/2016JD025730, 2016.
- 25 Zong, Z., Wang, X. P., Tian, C. G., Chen, Y. J., Qu, L., Ji, L., Zhi, G. R., Li, J. and Zhang, G.: Source apportionment of PM<sub>2.5</sub> at a regional background site in North China using PMF linked with radiocarbon analysis: Insight into the contribution of biomass burning, *Atmos. Chem. Phys.*, 16(17), 11249–11265, doi:10.5194/acp-16-11249-2016, 2016.
- 30

## Supplementary

Table S1 The distribution of the sample quantity during the entire study period at each site  
(sample quantity (proportion))

|               | Beijing        |                 |                 | Tianjin |         |         | Shijiazhuang |         |         | Xinglong |         |        |
|---------------|----------------|-----------------|-----------------|---------|---------|---------|--------------|---------|---------|----------|---------|--------|
|               | C <sup>a</sup> | MP <sup>b</sup> | HP <sup>c</sup> | C       | MP      | HP      | C            | MP      | HP      | C        | MP      | HP     |
| <b>Total</b>  | 100            | 70              | 54              | 80      | 93      | 41      | 41           | 87      | 93      | 149      | 41      | 21     |
| <b>Summer</b> | 33 (33%)       | 15(22%)         | 11(20%)         | 25(31%) | 28(30%) | 2(5%)   | 22(54%)      | 17(20%) | 15(16%) | 36(24%)  | 8(20%)  | 7(33%) |
| <b>Autumn</b> | 25 (25%)       | 17(24%)         | 6(11%)          | 21(26%) | 27(29%) | 3(7%)   | 11(27%)      | 29(33%) | 11(12%) | 33(22%)  | 6(15%)  | 7(33%) |
| <b>Winter</b> | 20 (20%)       | 16(23%)         | 22(41%)         | 19(24%) | 12(13%) | 21(51%) | 4(10%)       | 13(15%) | 40(43%) | 47(32%)  | 8(20%)  | 4(19%) |
| <b>Spring</b> | 22 (22%)       | 22(31%)         | 15(28%)         | 15(19%) | 26(28%) | 15(37%) | 4(10%)       | 28(32%) | 27(29%) | 33(22%)  | 19(46%) | 3(14%) |

<sup>a</sup> Clean days ( $PM_{2.5} < 75 \mu\text{g}/\text{m}^3$ ); <sup>b</sup> Moderate pollution days ( $75 \leq PM_{2.5} < 150 \mu\text{g}/\text{m}^3$ ); <sup>c</sup> Heavy pollution days ( $PM_{2.5} \geq 150 \mu\text{g}/\text{m}^3$ )

Table S2 The meteorological parameters under specific conditions during the sampling periods

|              |                 | Temperature (°C) |        |        |        | Relative humidity (%) |        |        |        | Wind speed (m/s) |        |        |        |
|--------------|-----------------|------------------|--------|--------|--------|-----------------------|--------|--------|--------|------------------|--------|--------|--------|
|              |                 | Summer           | Autumn | Winter | Spring | Summer                | Autumn | Winter | Spring | Summer           | Autumn | Winter | Spring |
| Beijing      | Annual          | 28.0             | 18.0   | 1.5    | 14.0   | 51                    | 59     | 32     | 35     | 1.0              | 0.8    | 1.5    | 1.7    |
|              | C <sup>a</sup>  | 28.3             | 18.6   | 1.5    | 12.1   | 44                    | 46     | 21     | 32     | 1.2              | 1.2    | 2.3    | 2.3    |
|              | MP <sup>b</sup> | 27.4             | 18.7   | 2.3    | 14.2   | 57                    | 69     | 34     | 33     | 0.9              | 0.6    | 1.4    | 1.6    |
|              | HP <sup>c</sup> | 27.7             | 17.5   | 1.1    | 16.4   | 67                    | 69     | 41     | 42     | 0.7              | 0.6    | 0.9    | 1.2    |
|              | D <sup>d</sup>  | 30.3             | 19.8   | 2.8    | 16.0   | 43                    | 51     | 28     | 27     | 1.4              | 1.0    | 1.7    | 2.1    |
|              | N <sup>e</sup>  | 25.8             | 16.2   | 0.1    | 11.2   | 60                    | 67     | 37     | 43     | 0.7              | 0.6    | 1.3    | 1.3    |
| Tianjin      | Annual          | 27.7             | 18.4   | 1.1    | 13.0   | 54                    | 60     | 41     | 41     | 1.5              | 1.3    | 1.4    | 1.8    |
|              | C               | 28.6             | 18.9   | 1.5    | 11.2   | 47                    | 61     | 31     | 39     | 1.6              | 1.4    | 1.8    | 2.1    |
|              | MP              | 27.2             | 19.1   | 1.1    | 13.3   | 59                    | 61     | 40     | 44     | 1.4              | 1.1    | 1.6    | 1.8    |
|              | HP              | 28.4             | 16.9   | 1.7    | 13.4   | 66                    | 53     | 46     | 40     | 1.2              | 1.2    | 1.1    | 1.5    |
|              | D               | 29.7             | 20.1   | 2.6    | 15.2   | 47                    | 53     | 35     | 34     | 1.8              | 1.5    | 1.7    | 2.1    |
|              | N               | 25.7             | 16.6   | -0.4   | 10.9   | 62                    | 69     | 45     | 48     | 1.2              | 1.0    | 1.2    | 1.5    |
| Shijiazhuang | Annual          | 26.9             | 17.9   | 1.0    | 13.8   | 63                    | 75     | 41     | 46     | 1.2              | 0.9    | 1.0    | 1.5    |
|              | C               | 28.6             | 16.3   | 1.9    | 9.1    | 50                    | 64     | 21     | 64     | 1.3              | 1.1    | 1.3    | 1.2    |
|              | MP              | 26.6             | 18.9   | 1.6    | 13.0   | 66                    | 78     | 35     | 47     | 1.2              | 0.9    | 1.4    | 1.5    |
|              | HP              | 26.2             | 17.7   | 0.6    | 15.5   | 71                    | 78     | 46     | 40     | 1.1              | 0.7    | 0.9    | 1.6    |
|              | D               | 29.2             | 19.6   | 3.0    | 16.0   | 54                    | 68     | 36     | 39     | 1.4              | 1.1    | 1.2    | 1.9    |
|              | N               | 24.8             | 16.2   | -1.0   | 11.5   | 70                    | 83     | 47     | 53     | 1.0              | 0.7    | 0.8    | 1.2    |
| Xinglong     | Annual          | 20.6             | 12.1   | -4.8   | 7.0    | 67                    | 66     | 40     | 44     | 2.3              | 2.5    | 2.7    | 3.3    |
|              | C               | 20.6             | 12.1   | -5.0   | 6.5    | 61                    | 58     | 35     | 30     | 2.1              | 2.6    | 2.9    | 3.4    |
|              | MP              | 19.7             | 14.0   | -3.1   | 8.9    | 80                    | 68     | 42     | 52     | 2.5              | 3.3    | 2.6    | 3.4    |
|              | HP              | 21.5             | 13.8   | -4.9   | 8.9    | 85                    | 74     | 79     | 66     | 2.7              | 2.4    | 1.4    | 3.6    |
|              | D               | 21.7             | 13.2   | -3.7   | 8.3    | 64                    | 62     | 36     | 38     | 2.4              | 2.7    | 2.7    | 3.6    |
|              | N               | 19.4             | 10.9   | -5.8   | 5.5    | 70                    | 71     | 43     | 50     | 2.1              | 2.3    | 2.7    | 3.1    |

<sup>a</sup> Clean days ( $PM_{2.5} < 75 \mu g/m^3$ ); <sup>b</sup> Moderate pollution days ( $75 \leq PM_{2.5} < 150 \mu g/m^3$ ); <sup>c</sup> Heavy pollution days ( $PM_{2.5} \geq 150 \mu g/m^3$ );

<sup>d</sup> Daytime; <sup>e</sup> Nighttime



Table S3 Comparisons of the PM<sub>2.5</sub> source apportionment results from this study and other recent studies

| Reference                     | Wu et al. (2014)          |      | Liu et al. (2017) |      | EPB <sup>a</sup>           |           |                  | This study |                                     |      |      |      |
|-------------------------------|---------------------------|------|-------------------|------|----------------------------|-----------|------------------|------------|-------------------------------------|------|------|------|
| City                          | BJ <sup>b</sup>           |      | TJ <sup>c</sup>   |      | BJ                         | TJ        | SJZ <sup>d</sup> | BJ         | TJ                                  | SJZ  |      |      |
| Time                          | 2010                      |      | 06-08/2015        |      | 2013-2014                  |           |                  | 2014-2015  |                                     |      |      |      |
| Method                        | PMF                       |      | PMF               |      | multiple models            |           |                  | PMF        |                                     |      |      |      |
| Sources and contributions (%) | traffic emissions         | 12.0 | vehicle exhaust   | 25.4 | vehicle exhaust            | 19.9–22.4 | 13.2–15.6        | 10.5–11.6  | motor vehicle exhaust               | 24.9 | 15.2 | 17.3 |
|                               | coal combustion           | 22.0 | coal combustion   | 16.5 | coal combustion            | 14.3–16.1 | 17.8–21.1        | 20.0–21.9  | coal combustion                     | 5.6  | 12.4 | 15.5 |
|                               | secondary sulfate/nitrate | 30.2 | secondary sources | 26.1 |                            |           |                  |            | secondary inorganic                 | 40.5 | 29.2 | 36.4 |
|                               | dust/soil                 | 12.4 | crustal dust      | 13.2 | soil dust                  | 9.2–10.3  | 19.8–23.4        | 15.8–17.3  | mineral dust                        | 8.6  | 11.7 | 8.5  |
|                               | metallurgical emission    | 0.4  |                   |      |                            |           |                  |            | oil refining /metal smelting source |      | 2.8  | 0.7  |
|                               | industry                  | 6.9  |                   |      | industry                   | 11.6–13.0 | 11.2–13.3        | 17.6–19.4  | industrial process                  | 3.2  | 8.9  | 6.1  |
|                               | secondary organic aerosol | 9.9  |                   |      | regional transport         | 28–36     | 22–34            | 23–30      |                                     |      |      |      |
|                               |                           |      | biomass burning   | 10.2 | other sources <sup>e</sup> | 9.0–10.2  | 4.0–4.7          | 6.2–6.8    | biomass burning                     | 4.5  | 5.3  | 2.8  |

<sup>a</sup> Beijing Municipal Environmental Protection Bureau (<http://www.bjepb.gov.cn/>), Tianjin Municipal Environmental Protection Bureau (<http://www.tjhb.gov.cn/>) and Shijiazhuang Municipal Environmental Protection Bureau (<http://www.sjzhb.gov.cn/>)

<sup>b</sup> Beijing; <sup>c</sup> Tianjin; <sup>d</sup> Shijiazhuang

<sup>e</sup> Including emissions from biomass burning, cooking, and agricultural, etc.

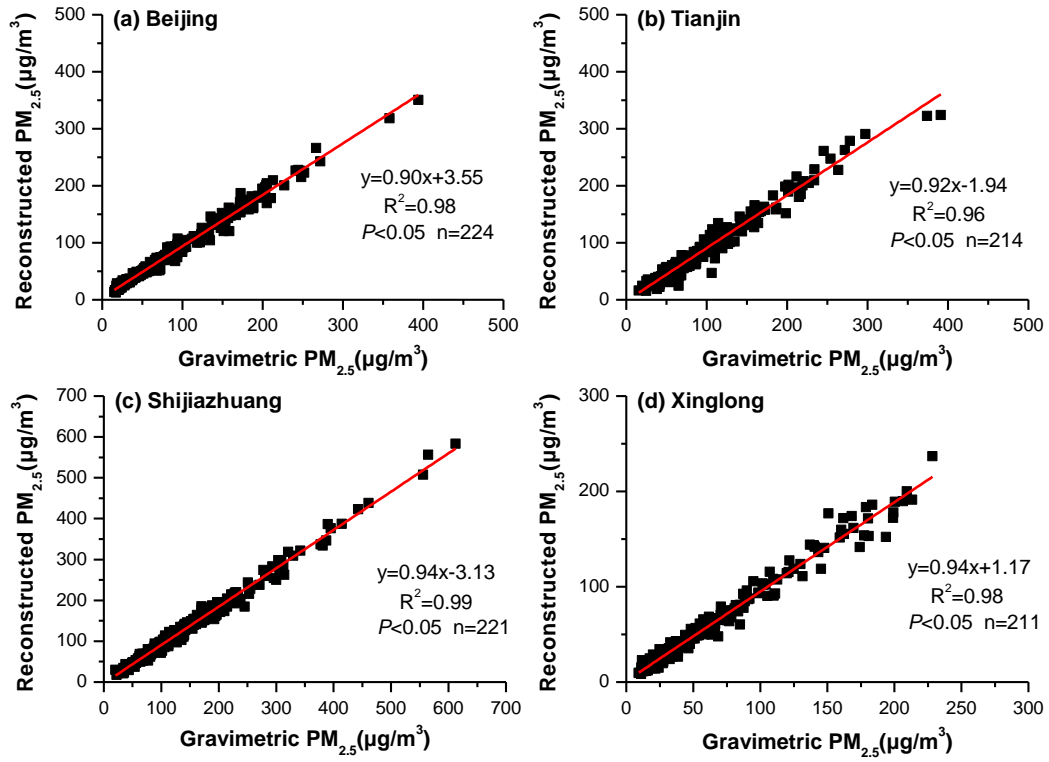

Figure S1. Gravimetric PM<sub>2.5</sub> versus reconstructed PM<sub>2.5</sub> mass concentrations from Beijing (a), Tianjin (b), Shijiazhuang (c) and Xinglong (d). "n" represents the sample quantity at each site.

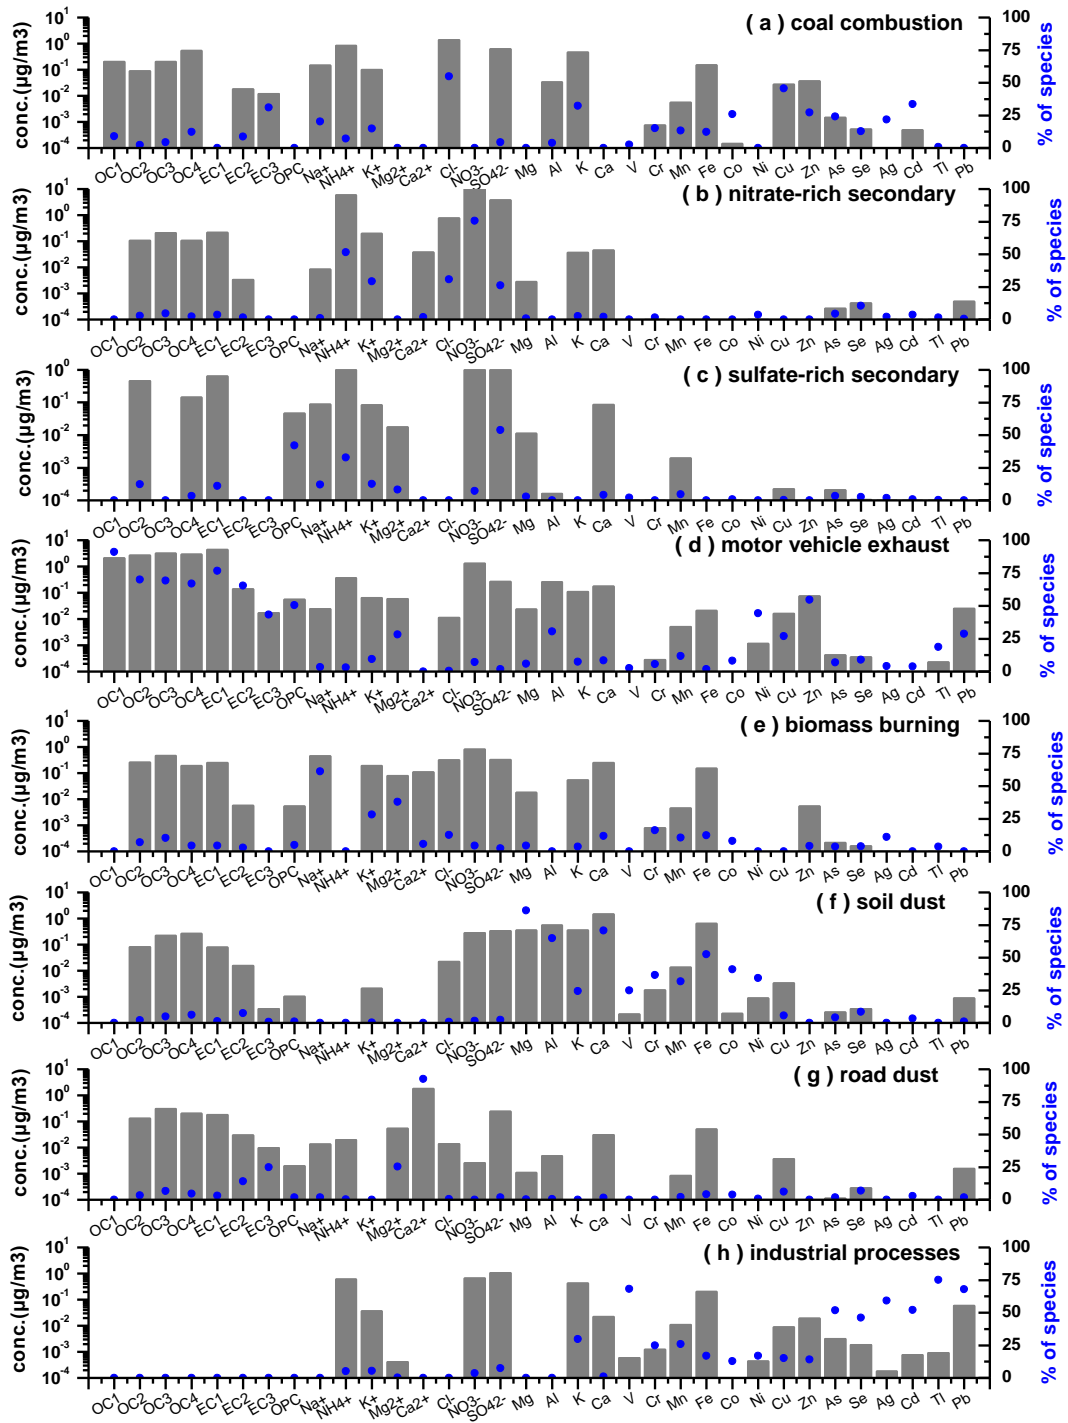

Figure S2. PMF factor/source profiles for the PM<sub>2.5</sub> samples throughout the entire study period in Beijing in terms of concentrations ( $\mu\text{g}/\text{m}^3$ ) and percentages (%)

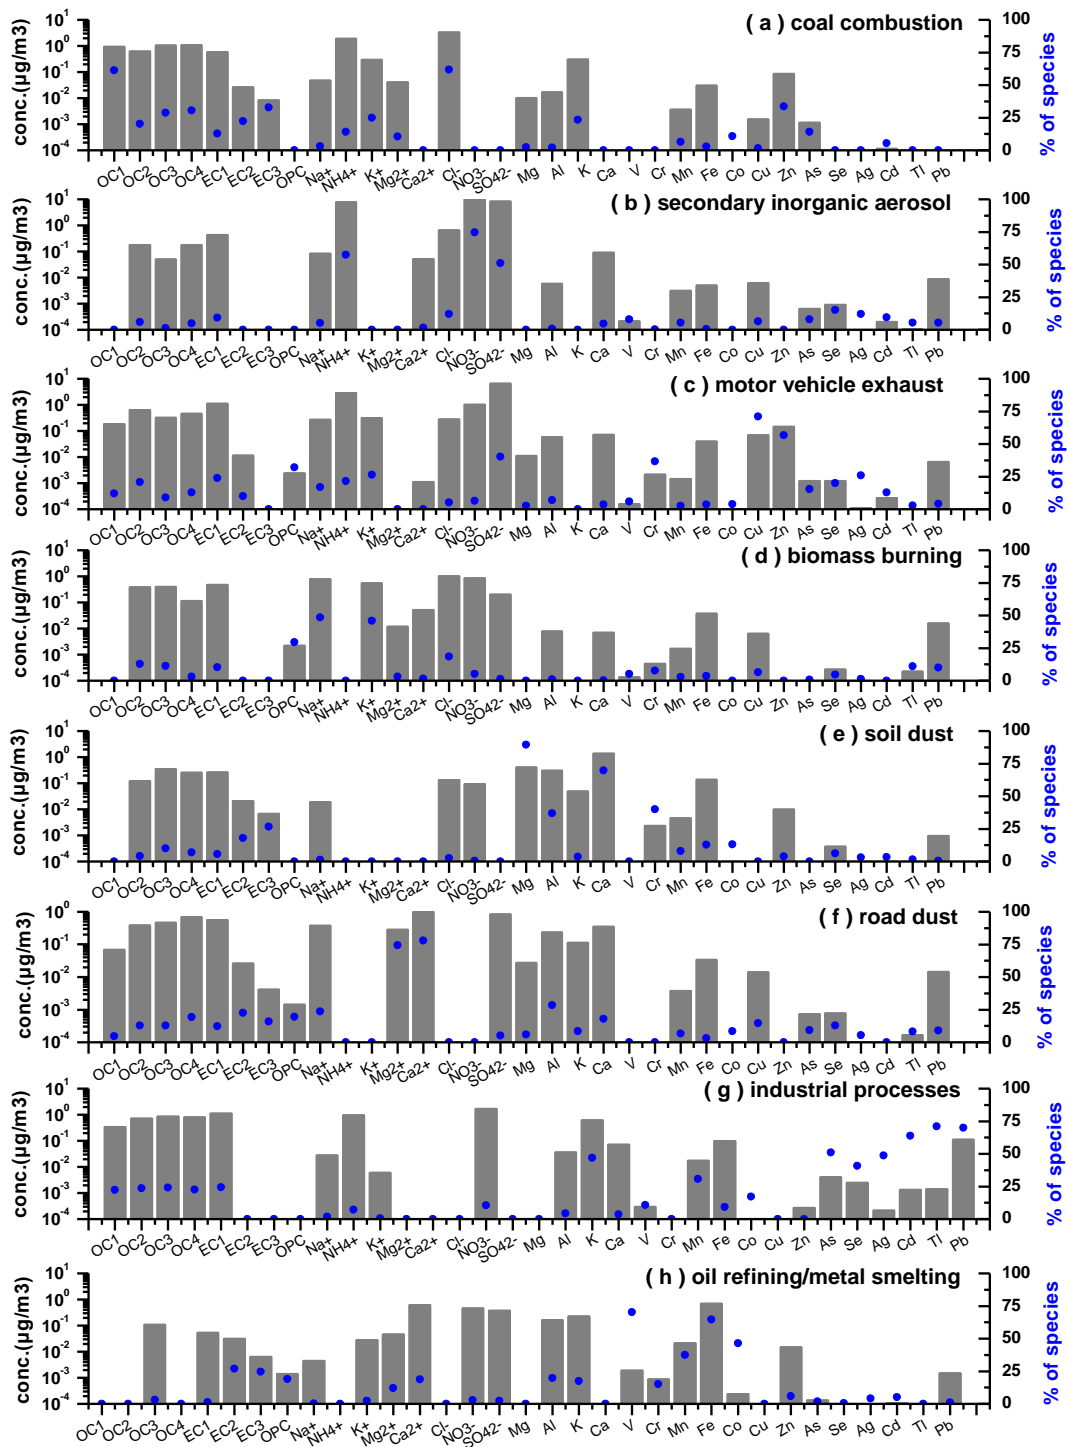

Figure S3. PMF factor/source profiles for the PM<sub>2.5</sub> samples throughout the entire study period in Tianjin in terms of concentrations ( $\mu\text{g}/\text{m}^3$ ) and percentages (%)

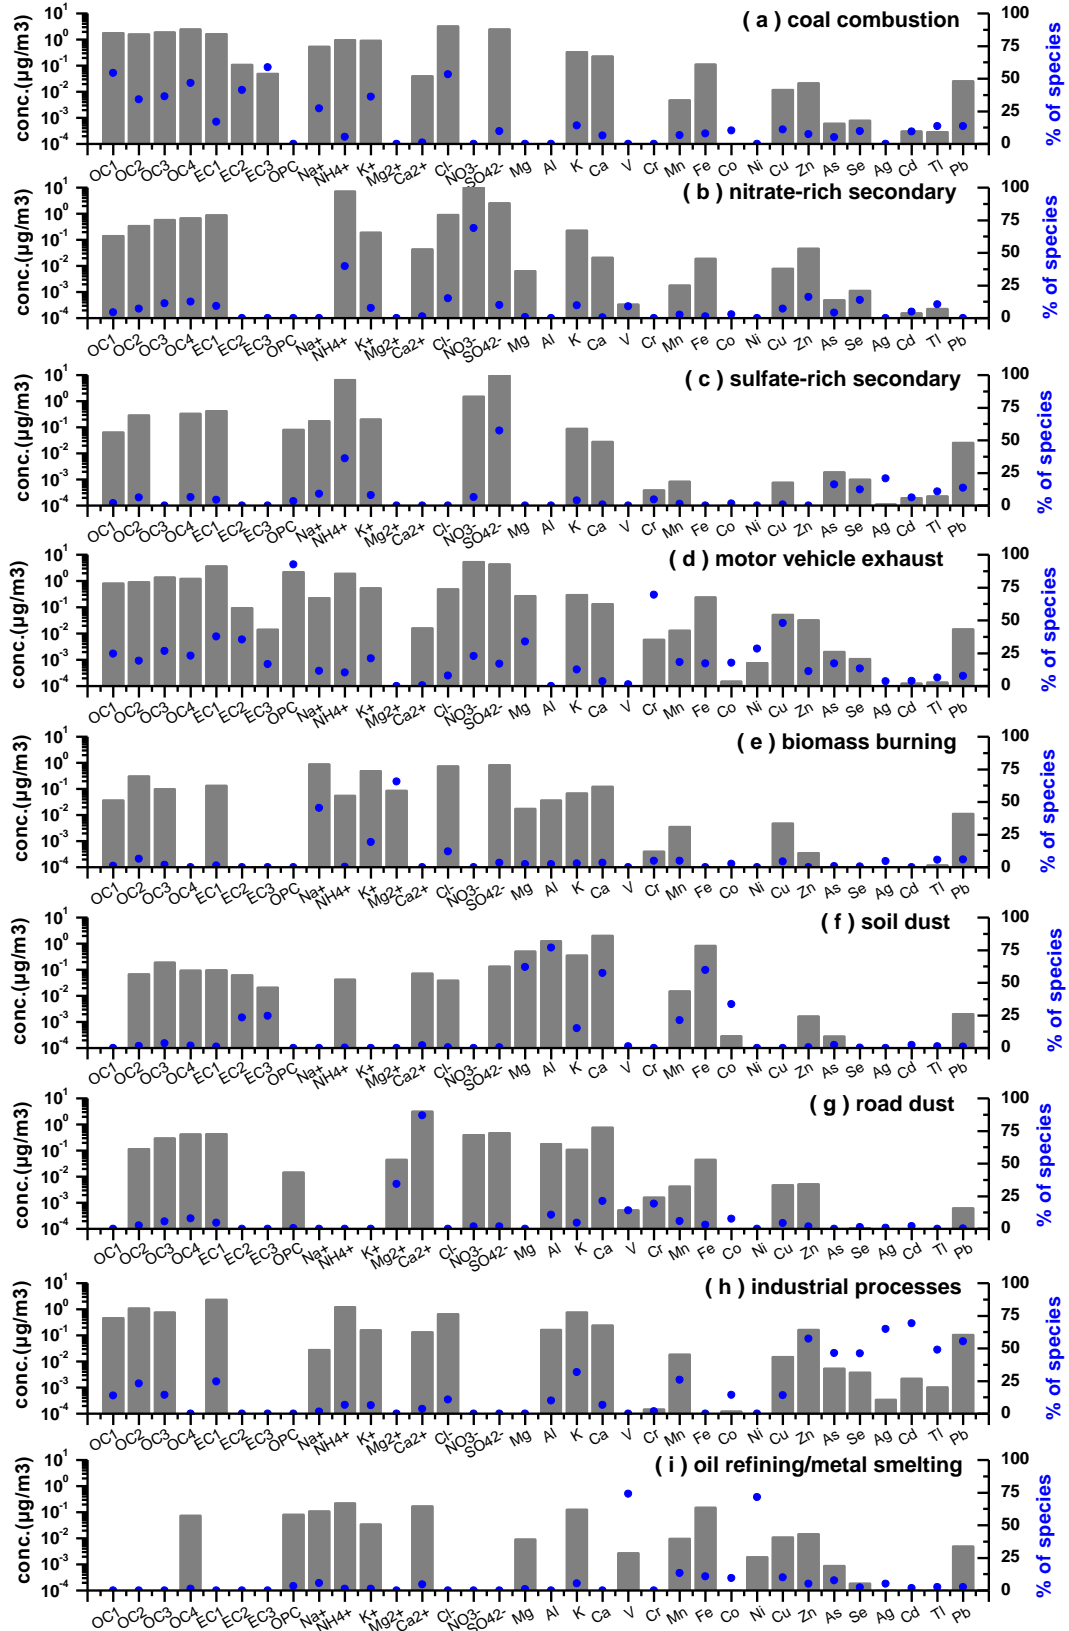

Figure S4. PMF factor/source profiles for PM<sub>2.5</sub> samples throughout the entire study period in Shijiazhuang in terms of concentrations ( $\mu\text{g}/\text{m}^3$ ) and percentages (%)

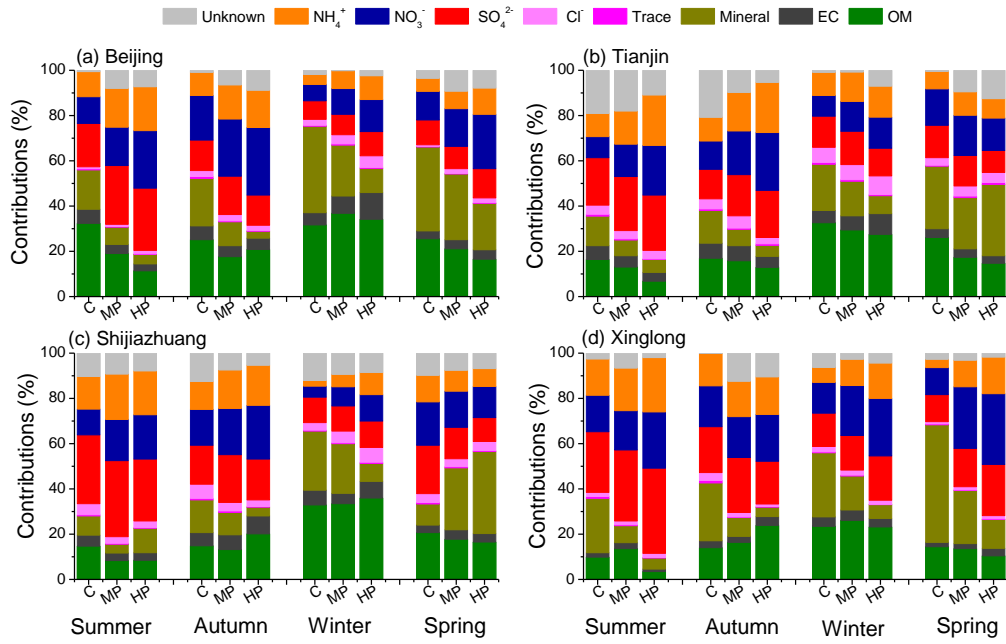

Figure S5. The mass fraction of each aerosol chemical species at different pollution levels throughout the entire study period. C, MP, and HP represent clean days ( $\text{PM}_{2.5} < 75 \mu\text{g}/\text{m}^3$ ), moderate pollution days ( $75 \leq \text{PM}_{2.5} < 150 \mu\text{g}/\text{m}^3$ ) and heavy pollution days ( $\text{PM}_{2.5} \geq 150 \mu\text{g}/\text{m}^3$ ), respectively. "%" represents the proportion of filter sample quantity at each pollution level to the total samples.

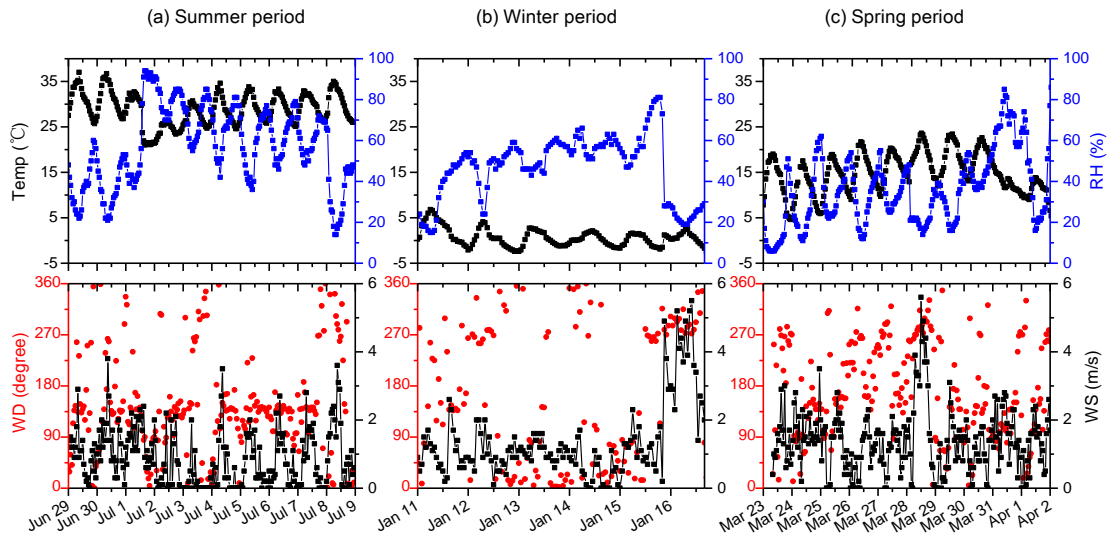

Figure S6. Time series variations of the meteorological parameters from Beijing during the specific pollution periods in summer (a), winter (b) and spring (c).

## Supplementary text for describing the day-night variations of PM<sub>2.5</sub> and major chemical components

The analysis of the day-night variations indicates that the differences in the PM<sub>2.5</sub> annual average concentrations during the day and those during the night were significant at the urban sites, where the values were 8–19% higher at night than those during the day, while negligible differences were found on the annual scale in Xinglong (Fig. S7). This obvious day-night variation of the PM<sub>2.5</sub> concentrations in urban areas was probably due to the apparent changes in the height of the mixing layer between day and night (Zhao et al., 2009). However, in Xinglong, the dominant source was from the regional or long-range transport, with fewer contributions from local emissions; thus, the nocturnal stable boundary layer could have reduced the quantity of transmissions from the outside. The chemical compositions also recorded obvious day-night variations, as the mass ratio of NO<sub>3</sub><sup>-</sup>/SO<sub>4</sub><sup>2-</sup> recorded higher values at night (0.99–1.39) than during the day (0.81–1.13), which is consistent with the similar results obtained by Sun et al. (2016) in Xianghe, which is located approximately 50 km southeast of Beijing. Such day-night variations indicate the important role of the gas-phase photochemical production of sulfate during the day while the facilitated gas-to-particle partitioning of semi-volatile nitrate is associated with the low temperatures (Sun et al., 2016) and effective hydrolysis of N<sub>2</sub>O<sub>5</sub> at night, which is a major source of nitric acid in the urban atmosphere during the night and is more efficient on wet surfaces (Zhang et al., 2015). In addition, the relatively static and stable meteorological conditions at night resulted in obviously lower fractions of mineral dust (11.3–17.0%, except for in Tianjin), than those recorded during the day (18.3–24.3%).

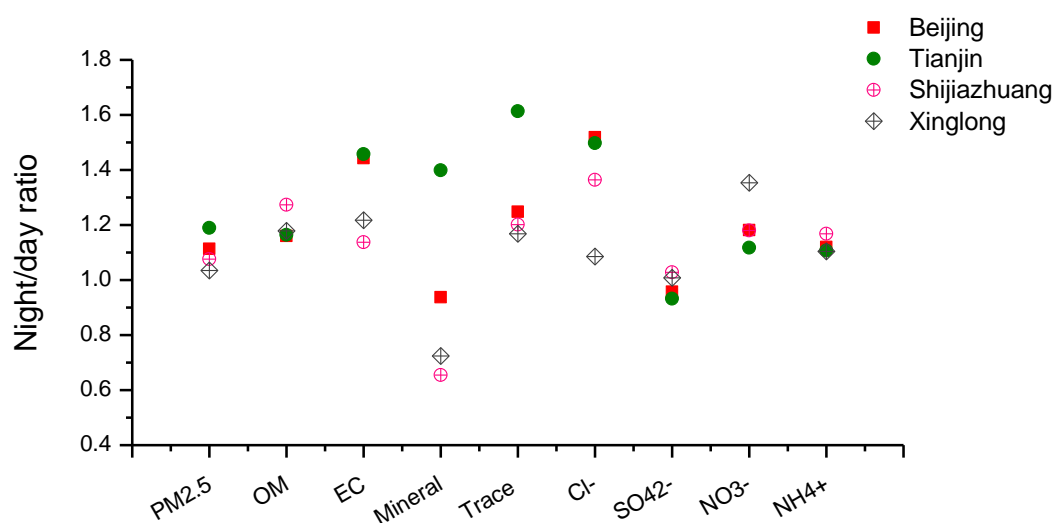

Figure S7. Day-night variations of PM<sub>2.5</sub> and major chemical components, based on annual data

## References

- Liu, B., Yang, J., Yuan, J., Wang, J., Dai, Q., Li, T., Bi, X., Feng, Y., Xiao, Z., Zhang, Y. and Xu, H.: Source apportionment of atmospheric pollutants based on the online data by using PMF and ME2 models at a megacity, China, *Atmos. Res.*, 185, 22–31, doi:10.1016/j.atmosres.2016.10.023, 2017.
- Sun, Y. L., Jiang, Q., Xu, Y. S., Ma, Y., Zhang, Y. J., Liu, X. G., Li, W. J., Li, J., Wang, P. C., Wang, F. and Li, Z. Q.: Aerosol characterization over the North China Plain: Haze life cycle and biomass burning impacts in summer, *J. Geophys. Res. Atmos. Res.*, 121, 2508–2521, doi:10.1002/2015JD024261, 2016.
- Wu, S., Deng, F., Wei, H., Huang, J., Wang, X., Hao, Y., Zheng, C., Qin, Y., Lv, H., Shima, M. and Guo, X.: Association of cardiopulmonary health effects with source-appointed ambient fine particulate in Beijing, China: A combined analysis from the healthy volunteer natural relocation (HVNR) study, *Environ. Sci. Technol.*, 48(6), 3438–3448, doi:10.1021/es404778w, 2014.
- Zhang, R. Y., Wang, G. H., Guo, S., Zamora, M. L., Ying, Q., Lin, Y., Wang, W. gang, Hu, M. and Wang, Y.: Formation of urban fine particulate matter, *Chem Rev*, 115(10), 3803–3855, doi:10.1021/acs.chemrev.5b00067, 2015.
- Zhao, X. J., Zhang, X. L., Xu, X. F., Xu, J., Meng, W. and Pu, W. W.: Seasonal and diurnal variations of ambient PM<sub>2.5</sub> concentration in urban and rural environments in Beijing, *Atmos. Environ.*, 43(18), 2893–2900, doi:10.1016/j.atmosenv.2009.03.009, 2009.
